# Supplementary material for: Prognostic value of different lymph node staging methods for node-positive cardia gastric cancer: a register-based retrospective cohort study
Source: PubMed Central journal article supplement — BMJ Open. 2021 Aug 23;11(8):e050378. doi: 10.1136/bmjopen-2021-050378 (PMC8383860; doi:10.1136/bmjopen-2021-050378), 2021-08-23
Supplement: bmjopen-2021-050378.draft_revisions.pdf [file bmjopen-2021-050378.draft_revisions.pdf]

# BMJ Open

BMJ Open is committed to open peer review. As part of this commitment we make the peer review history of every article we publish publicly available.

When an article is published we post the peer reviewers' comments and the authors' responses online. We also post the versions of the paper that were used during peer review. These are the versions that the peer review comments apply to.

The versions of the paper that follow are the versions that were submitted during the peer review process. They are not the versions of record or the final published versions. They should not be cited or distributed as the published version of this manuscript.

BMJ Open is an open access journal and the full, final, typeset and author-corrected version of record of the manuscript is available on our site with no access controls, subscription charges or pay-per-view fees (<http://bmjopen.bmj.com>).

If you have any questions on BMJ Open's open peer review process please email [info.bmjopen@bmj.com](mailto:info.bmjopen@bmj.com)

# BMJ Open

## Prognostic value of different lymph node staging methods for node positive cardia gastric cancer

|                               |                                                                                                                                                  |
|-------------------------------|--------------------------------------------------------------------------------------------------------------------------------------------------|
| Journal:                      | <i>BMJ Open</i>                                                                                                                                  |
| Manuscript ID                 | bmjopen-2021-050378                                                                                                                              |
| Article Type:                 | Original research                                                                                                                                |
| Date Submitted by the Author: | 22-Feb-2021                                                                                                                                      |
| Complete List of Authors:     | Wang, Xiao-Qing; Anhui Medical College<br>Bao, Min; Anhui Medical College<br>Zhang, Cheng; First Affiliated Hospital of Anhui Medical University |
| Keywords:                     | Gastrointestinal tumours < ONCOLOGY, Gastrointestinal tumours < GASTROENTEROLOGY, SURGERY                                                        |
|                               |                                                                                                                                                  |

SCHOLARONE™  
Manuscripts

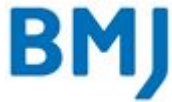

I, the Submitting Author has the right to grant and does grant on behalf of all authors of the Work (as defined in the below author licence), an exclusive licence and/or a non-exclusive licence for contributions from authors who are: i) UK Crown employees; ii) where BMJ has agreed a CC-BY licence shall apply, and/or iii) in accordance with the terms applicable for US Federal Government officers or employees acting as part of their official duties; on a worldwide, perpetual, irrevocable, royalty-free basis to BMJ Publishing Group Ltd ("BMJ") its licensees and where the relevant Journal is co-owned by BMJ to the co-owners of the Journal, to publish the Work in this journal and any other BMJ products and to exploit all rights, as set out in our [licence](#).

The Submitting Author accepts and understands that any supply made under these terms is made by BMJ to the Submitting Author unless you are acting as an employee on behalf of your employer or a postgraduate student of an affiliated institution which is paying any applicable article publishing charge ("APC") for Open Access articles. Where the Submitting Author wishes to make the Work available on an Open Access basis (and intends to pay the relevant APC), the terms of reuse of such Open Access shall be governed by a Creative Commons licence – details of these licences and which [Creative Commons](#) licence will apply to this Work are set out in our licence referred to above.

Other than as permitted in any relevant BMJ Author's Self Archiving Policies, I confirm this Work has not been accepted for publication elsewhere, is not being considered for publication elsewhere and does not duplicate material already published. I confirm all authors consent to publication of this Work and authorise the granting of this licence.

1  
2  
3  
4  
5  
6  
7  
8  
9  
10  
11  
12  
13  
14  
15  
16  
17  
18  
19  
20  
21  
22  
23  
24  
25  
26  
27  
28  
29  
30  
31  
32  
33  
34  
35  
36  
37  
38  
39  
40  
41  
42  
43  
44  
45  
46  
47  
48  
49  
50  
51  
52  
53  
54  
55  
56  
57  
58  
59  
60

1 **Title page**

2 **Article title:** Prognostic value of different lymph node staging methods for node positive cardia  
3 gastric cancer

4 **Author information:** Xiao-Qing Wang 1, Min Bao 1, Cheng Zhang 2

5 1 Anhui Medical College, Hefei, Anhui, China PR

6 2 Anhui Provincial Cancer Institute, the First Affiliated Hospital of Anhui Medical University,  
7 Hefei, Anhui, China PR

8 Corresponding to: Cheng Zhang, [ahmuzc@sina.cn](mailto:ahmuzc@sina.cn)

9 **Disclaimer:** The views expressed in the submitted article are our own and not an official position  
10 of the institution or funder.

11 **Word count:** 2052 (excluding its abstract, acknowledgments, tables, figure legends, and  
12 references) abstract 274 .

13 **Number of figures and tables:** This draft included 4 figures and 2 tables.

14 **Disclosure of relationships and activities:** None.

1  
2  
3  
4  
5  
6  
7  
8  
9  
10  
11  
12  
13  
14  
15  
16  
17  
18  
19  
20  
21  
22  
23  
24  
25  
26  
27  
28  
29  
30  
31  
32  
33  
34  
35  
36  
37  
38  
39  
40  
41  
42  
43  
44  
45  
46  
47  
48  
49  
50  
51  
52  
53  
54  
55  
56  
57  
58  
59  
60

15 **Abstract**

16 Objective: To investigate the prognostic efficacy of lymph node ratio (LNR) and log odds of  
17 positive lymph nodes (LODDS) in node positive cardia gastric adenocarcinoma (CGA).

18 Design: A SEER database review

19 Participants: A total of 1 038 patients with node positive CGA were enrolled from SEER database.

20 Seventy percent of the entire patients were randomly assigned to training set (N = 723) and the  
21 rest was assigned to validating set (N = 315).

22 Interventions: The major endpoint was cancer specific survival (CSS). Optimal cut-off values  
23 were determined by X-tile software. The prognostic power was evaluated using Akaike  
24 Information Criterion (AIC) and Harrell concordance index (C-index). Cox stepwise regression  
25 analysis was performed to construct nomogram for prediction of 1-, 2-, and 5-year CSS.

26 Results: The training set and validating set are similar in terms of clinical and demographic  
27 features. The optimal cut-off values for LNR were 0.09 and 0.33, and for LODDS were -2.09 and  
28 -0.65. CSS was significantly different by N, LNR and LODDS categories. The C-index of N stage  
29 was lower than that of LNR or LODDS. The AIC of N stage was higher than that of LNR or  
30 LODDS. Independent predictors included age, race, tumor grade, T stage, M stage and LNR (or  
31 LODDS) and they were incorporated in nomograms for 1-, 2- and 5-year CSS prediction.  
32 Calibration plots showed satisfied results of internal and external validity of the nomogram.

33 Conclusions: LNR and LODDS staging methods have better prognostic efficacy than traditional N  
34 staging method in CGA patients with regional node metastasis. Besides, the two values are  
35 promising substitute for N staging in nomogram development when other independent prognostic  
36 factors are incorporated.

37  
38 Key words: Cardia; Adenocarcinoma; Stomach Neoplasms; Lymph Node Ratio; Neoplasm  
39 Staging

1  
2  
3  
4  
5  
6  
7  
8  
9  
10  
11  
12  
13  
14  
15  
16  
17  
18  
19  
20  
21  
22  
23  
24  
25  
26  
27  
28  
29  
30  
31  
32  
33  
34  
35  
36  
37  
38  
39  
40  
41  
42  
43  
44  
45  
46  
47  
48  
49

**Strengths and limitations of this study**

- This study used national cancer registry data for cardia gastric adenocarcinoma research;
- Novel staging methods based on the number of positive lymph node was established for prognostic prediction;
- Nomograms based on the new staging methods were constructed and validated;
- This study needs to be confirmed by other populations.

**Patient consent form:** The SEER database review is granted exemption from obtaining patients' consents.

**Word count:** 2052 (excluding its abstract, acknowledgments, tables, figure legends, and references) abstract 274 .

For peer review only

## 50 Introduction

51 Gastric cancer (GC) generally includes 2 topographical categories: non-cardia GC that arises from  
52 more distant sites and cardia GC that arises in gastroesophageal junction (GEJ). In contrast to  
53 steady decline of non-cardia GC incidence, cardia GC occurs more frequently, particular in  
54 high-income countries (1, 2). This trend is associated with obesity, gastroesophageal reflux  
55 disease (GERD), and Barrett esophagus (2). In addition to different incidence trend,  
56 clinicalpathological feature and long-term survival vary between the two GC subtypes (3). For  
57 accurate prediction of survival, precise staging is required. The Tumor-Node-Metastasis (TNM)  
58 classification 7<sup>th</sup> edition by the American Joint Committee on Cancer (AJCC) recommends at least  
59 15 lymph nodes (LN) collection for N staging (4, 5). However inadequate LN harvest frequently  
60 occurs due to many conditions, thus precise staging cannot be obtained sometimes. It has been  
61 demonstrated that LN ratio (LNR) could better estimate survival of GC patients after curative  
62 gastrectomy, regardless of the number of LN examined (6), and may be promising for aiding  
63 TNM staging system (7). Apart from that, log odds of positive LN (LODDS) outperformed N and  
64 LNR staging system when predicting survival of GC patients (8-10). Therefore the traditional N  
65 staging classification may be substituted with different methods, with even improved performance.  
66 Nevertheless little evidence evaluates the performance of the two LN staging systems  
67 aforementioned in cardia GC, since it has distinct clinical characteristics and epidemiology from  
68 overall GC.

69 Here we use nationwide cancer registry data to appraise the prognostic value of LNR and LODDS  
70 in patients with node positive cardia gastric adenocarcinoma (CGA), and, if possible, construct  
71 nomogram for survival prediction based on the new LN staging system.

## 72 Methods

### 73 Selection and Description of Participants

74 The inclusion criteria were as follows: 1) the International Classification of Disease for Oncology,  
75 Third Edition (ICD-O-3) for primary tumor site was C16.0 (cardia); 2) broad histological recode  
76 was 8140-8389: adenomas and adenocarcinomas; 3) diagnostic confirmation was positive  
77 histology; 4) surgery was performed; 5) diagnosed during 2010-2015; 6) the definite number of  
78 regional positive nodes was clear and not zero. We excluded cases with unknown race, T stage  
79 information, tumor size and grade. As shown in Figure 1, the final cohort enrolled 1 038 patients  
80 with node positive CGA, of whom 857 were male and 181 were female. Three hundred and thirty  
81 eight (32.56%) were over 70 years old. Eight hundred and ninety six (86.32%) were white, 64  
82 were black and 78 were other races. Next 70% of the entire patients were randomly assigned to  
83 training set (N = 723) and the rest was assigned to validating set (N = 315).

### 84 Patient and Public Involvement

85 This study is a data review based on SEER program, so it was granted exemption from requiring  
86 informed consent. All procedures performed in studies involving human participants were in  
87 accordance with the ethical standards of the Ethics Committee of the Anhui Medical College. We  
88 used SEER\*Stat (version 8.3.8) to access to Incidence - SEER Research Data, 18 Registries, Nov  
89 2019 Sub 2000-2017 (SEER 18 database) (11) for collection of node positive CGA patients  
90 (username: 21268-Nov2019). Patients were not involved in the recruitment to and conduct of the

91 study. The findings of the study will be disseminated to all study participants by online article.

## 92 **Technical Information**

93 The main outcome was cancer specific survival (CSS), which was referred to as death specifically  
 94 due to CGA and the period between first diagnosis and death. In addition, we extracted the  
 95 following variables for analysis: sex, race, age, AJCC 7<sup>th</sup> TNM stage information, tumor size,  
 96 grade, number of regional nodes examined and number of regional nodes positive. LNR and  
 97 LODDS were calculated as previously reported (12). Briefly, LNR was defined as the ratio of the  
 98 number of positive nodes divided by the total number of examined nodes. LODDS was calculated  
 99 using the formula:  $\log(\text{NPLN}+0.50)/(\text{NDLN}-\text{NPLN}+0.50)$ , in which 0.50 was added to both the  
 100 numerator and denominator to avoid an infinite number.

101 The optimal thresholds for cutting LNR and LODDS into trichotomous variables were determined  
 102 by X-tile software (version 3.6.1) (13), which were based on the maximal log-rank chi-square  
 103 value that represented the greatest group difference of CSS probability.

## 104 **Statistics**

105 The distributions of baseline features between training set and validating set were described and  
 106 compared by chi-square test. Survival curves, median survival and CSS rates were generated using  
 107 the Kaplan-Meier method. Outcome difference between groups was analyzed by the log-rank test.  
 108 Multivariable Cox regression model was used to establish prognostic model for CSS. The  
 109 prognostic power was evaluated using Akaike Information Criterion (AIC) and Harrell  
 110 concordance index (C-index). A predictive model with lower AIC indicated better model fit, while  
 111 with higher C-index indicated better discriminative ability. A value of C-index of 0.5 indicates no  
 112 predictive power, and an index of 1.0 indicates complete differentiation. Cox stepwise regression  
 113 analysis was also performed to construct nomogram for prediction of 1-, 2-, and 5-year CSS.  
 114 Validation of nomogram was performed by internal and external calibration plots (14). Bootstraps  
 115 with 1 000 resample were used for validation activities. All statistical analyses were performed  
 116 using R software (version 3.5.3). A two-tailed P value of less than 0.05 was considered  
 117 statistically significant.

## 118 **Results**

119 Table 1 summarized the demographic and clinical feature of the participants. Six hundred and  
 120 twenty eight patients (60.50%) were diagnosed with a tumor less than 5cm. Six hundred and forty  
 121 patients (61.66%) were with grade III or IV. The numbers of patients with T1, T2, T3 and T4  
 122 respectively were 94, 125, 717 and 102. The numbers of patients with N1, N2 and N3 respectively  
 123 were 488, 331 and 219. Seventy five patients (7.23%) were with distant metastasis at presentation.  
 124 The median CSS was 27 months. The 1-, 2- and 5-year CSS rates were 76.8%, 53.0% and 29.2%,  
 125 respectively. There was no statistical difference of baseline characteristics between training set  
 126 and validating set. The detailed information of the two sets was also presented in Table 1.

Table 1. Baseline information of the included patients with node positive CGA,  
 N(%).

| Groups | Training set<br>(N = 723) | Validating set<br>(N = 315) | P-value |
|--------|---------------------------|-----------------------------|---------|
|--------|---------------------------|-----------------------------|---------|



|                          |                   |                   |  |       |
|--------------------------|-------------------|-------------------|--|-------|
| Sex                      |                   |                   |  |       |
| Male                     | 596 (82.43)       | 261 (82.86)       |  | 0.939 |
| Female                   | 127 (17.57)       | 54 (17.14)        |  |       |
| Age                      |                   |                   |  |       |
| <70                      | 490 (67.77)       | 210 (66.67)       |  | 0.781 |
| ≥70                      | 233 (32.23)       | 105 (33.33)       |  |       |
| Race                     |                   |                   |  |       |
| White                    | 628 (86.86)       | 268 (85.08)       |  |       |
| Black                    | 40 (5.53)         | 24 (7.62)         |  | 0.437 |
| Others                   | 55 (7.61)         | 23 (7.30)         |  |       |
| Tumor size               |                   |                   |  |       |
| <5cm                     | 442 (61.13)       | 186 (59.05)       |  | 0.573 |
| ≥5cm                     | 281 (38.87)       | 129 (40.95)       |  |       |
| Grade                    |                   |                   |  |       |
| I-II                     | 279 (38.59)       | 119 (37.78)       |  | 0.859 |
| III-IV                   | 444 (61.41)       | 196 (62.22)       |  |       |
| T stage                  |                   |                   |  |       |
| T1                       | 70 (9.68)         | 24 (7.62)         |  |       |
| T2                       | 83 (11.48)        | 42 (13.33)        |  | 0.600 |
| T3                       | 501 (69.30)       | 216 (68.57)       |  |       |
| T4                       | 69 (9.54)         | 33 (10.48)        |  |       |
| N stage                  |                   |                   |  |       |
| N1                       | 348 (48.13)       | 140 (44.44)       |  | 0.545 |
| N2                       | 225 (31.12)       | 106 (33.65)       |  |       |
| N3                       | 150 (20.75)       | 69 (21.91)        |  |       |
| M stage                  |                   |                   |  |       |
| M0                       | 678 (93.78)       | 285 (90.48)       |  | 0.079 |
| M1                       | 45 (6.22)         | 30 (9.52)         |  |       |
| Median survival (months) | 28 (25, 32)       | 25 (21, 32)       |  | 0.361 |
| CSS rate (%)             |                   |                   |  |       |
| 1-year                   | 77.0 (74.0, 80.2) | 76.3 (71.6, 81.2) |  |       |
| 2-year                   | 53.7 (50.1, 57.5) | 51.4 (46.0, 57.5) |  |       |
| 5-year                   | 30.3 (26.7, 34.5) | 26.4 (20.9, 33.4) |  |       |

Abbreviation: CGA, cardia gastric adenocarcinoma; CSS, cancer-specific survival

127 According to X-tile software results, the optimal cut-off values for LNR were 0.09 and 0.33, and  
 128 for LODDS were -2.09 and -0.65. Thus patients were separated into low (R1), medium (R2) or  
 129 high LNR (R3) group, or low (L1), medium (L2) or high LODDS (L3) group. Next we illustrated  
 130 the survival curves of the patients according to N, LNR or LODDS staging system. As shown in  
 131 Figure 2 training set section, CSS was significantly different by all the three staging systems (all  
 132 the log-rank P values < 0.0001); however the 95% CIs of N2 and N3 survival curve initially  
 133 separated and partly overlapped afterwards. The inferior discriminative ability of N system was  
 134 further supported by AIC and C-index. As shown in Table 2, the C-index of N stage was lower  
 135 than that of LNR or LODDS. Similarly, the AIC of N stage was higher than that of LNR or

136 LODDS. The prognostic value of adjusted model was better than crude mode generally. In  
 137 addition, the value of LNR system seemed to be worse than LODDS system; however the  
 138 difference was not noticeable, so we considered both of the systems into nomogram construction.

Table 2. Prognostic values of variables for patients with node positive CGA (N = 1038).

| Variables                       | Crude model       |         |      | Adjusted model    |         |      |
|---------------------------------|-------------------|---------|------|-------------------|---------|------|
|                                 | HR (95% CI)       | C-index | AIC  | HR (95% CI)       | C-index | AIC  |
| <b>Training set (N = 723)</b>   |                   |         |      |                   |         |      |
| N stage                         |                   | 0.572   | 5412 |                   | 0.633   | 5379 |
| N1                              | 1 (ref)           |         |      | 1 (ref)           |         |      |
| N2                              | 1.44 (1.17, 1.79) |         |      | 1.34 (1.07, 1.66) |         |      |
| N3                              | 1.98 (1.57, 2.51) |         |      | 1.71 (1.34, 2.19) |         |      |
| LNR*                            |                   | 0.607   | 5376 |                   | 0.655   | 5343 |
| R1                              | 1 (ref)           |         |      | 1 (ref)           |         |      |
| R2                              | 1.88 (1.44, 2.44) |         |      | 1.83 (1.40, 2.39) |         |      |
| R3                              | 3.02 (2.30, 3.97) |         |      | 2.74 (2.07, 3.63) |         |      |
| LODDS*                          |                   | 0.609   | 5373 |                   | 0.656   | 5339 |
| L1                              | 1 (ref)           |         |      | 1 (ref)           |         |      |
| L2                              | 1.93 (1.48, 2.51) |         |      | 1.86 (1.42, 2.44) |         |      |
| L3                              | 3.13 (2.38, 4.13) |         |      | 2.87 (2.16, 3.81) |         |      |
| <b>Validating set (N = 315)</b> |                   |         |      |                   |         |      |
| N stage                         |                   | 0.603   | 1953 |                   | 0.681   | 1926 |
| N1                              | 1 (ref)           |         |      | 1 (ref)           |         |      |
| N2                              | 1.89 (1.36, 2.63) |         |      | 1.88 (1.34, 2.64) |         |      |
| N3                              | 2.34 (1.62, 3.38) |         |      | 2.18 (1.47, 3.24) |         |      |
| LNR*                            |                   | 0.646   | 1927 |                   | 0.702   | 1902 |
| R1                              | 1 (ref)           |         |      | 1 (ref)           |         |      |
| R2                              | 2.20 (1.47, 3.30) |         |      | 2.14 (1.41, 3.23) |         |      |
| R3                              | 4.16 (2.76, 6.28) |         |      | 4.00 (2.59, 6.17) |         |      |
| LODDS*                          |                   | 0.647   | 1927 |                   | 0.703   | 1901 |
| L1                              | 1 (ref)           |         |      | 1 (ref)           |         |      |
| L2                              | 2.07 (1.39, 3.09) |         |      | 2.08 (1.38, 3.14) |         |      |
| L3                              | 4.22 (2.79, 6.39) |         |      | 4.10 (2.65, 6.34) |         |      |

Abbreviations: CGA, cardia gastric adenocarcinoma; HR, hazard ratio; CI, confidence interval; AIC, Akaike information criterion; LNR, lymph node ratio; LODDS, log odds of positive lymph nodes.

Adjusted model considered age, sex, race, tumor size, grade, T stage and M stage.

\* cut-off values for LNR were 0.09 and 0.33, and for LODDS were -2.09 and -0.65.

139 Stepwise Cox regression analysis showed age, race, tumor grade, T stage, M stage and LNR (or  
 140 LODDS) were independent predictors, so these factors were included in nomograms. For both  
 141 LNR and LODDS, the total score was 40, and higher score suggested lower survival (Figure 3A  
 142 and 4A). Next calibration plot was used to assess the internal and external validity of the  
 143 nomogram (Figure 3B, 3C, 4B and 4C). Since the cross-spot line was generally close to the grey

1  
2  
3 144 reference line, we concluded the predicted CSS was well correlated with the actual situation.  
4

5 145 **Discussion**  
6

7 146 The present study analyzes national cancer registry databases and demonstrates that survival of  
8 147 patients with node-positive CGA is well predicted when the traditional N staging method is  
9 148 substituted with LNR or LODDS system. This finding both exists in training and validating sets.  
10 149 In training set, the survival curves separate clearly when patient grouping is implemented by LNR  
11 150 or LODDS method, which is not achieved by traditional N staging system. Adjusted model that  
12 151 simultaneously considers staging, clinical and demographic features outperforms crude model that  
13 152 only takes staging into account. Therefore multiple independent survival factors are incorporated  
14 153 in nomogram construction, which suggests older age at diagnosis, white, higher grade, greater  
15 154 tumor infiltration, higher proportion of positive LN, and metastasis as risk factors. The  
16 155 nomograms perform steadily in 1-, 2- and 5-year CSS prediction as the validation plots show.

17  
18  
19  
20  
21 156 Previous studies have demonstrated the superiority of LNR or LODDS for prognostic prediction  
22 157 in GC after surgical resection (8-10, 15-17). However the GC patients are not further separated  
23 158 and investigated according to primary tumor site, since there is much difference between cardia  
24 159 and non-cardia GC in terms of tumor features, etiological factors, and biological behaviors (3). In  
25 160 AJCC cancer staging 7<sup>th</sup> edition, tumors involving EGJ was categorized as esophagus cancer (5),  
26 161 which was however argued by the viewpoint that GC staging system has a better ability to predict  
27 162 survival of EGJ tumor (18, 19). In the latest 8<sup>th</sup> edition (20), a tumor that has its epicenter within 2  
28 163 cm of EGJ and involves the EGJ (Siewert type I/II) is classified as esophageal cancer. Other  
29 164 situation, including a tumor with epicenter more than 2 cm from EGJ or a tumor located with 2 cm  
30 165 of EGJ but does not involve EGJ, is classified as stomach cancer. The superiority of the new  
31 166 system is confirmed by a retrospective observational study from two high-volume institutions in  
32 167 China, regardless of Siewert type (21). In terms of Siewert type II junctional adenocarcinoma, a  
33 168 marginal advantage of the esophagus cancer system is found in discriminating survival rates after  
34 169 3 and 5 years, however the advantage of GC system lies in division of the N3 category into N3a  
35 170 and N3b, so the authors concludes neither the esophageal nor the stomach staging system is  
36 171 flawless in predicting survival in Siewert type II junctional cancer (22). Above all, CGA is  
37 172 probably a special entity that has a different biological property compared with genuine gastric  
38 173 and genuine esophageal cancer. To the best of our knowledge, the present study first reveals a  
39 174 superior performance of prognostic prediction based on LNR or LODDS in node positive CGA  
40 175 patients. Unfortunately we are unable to consider Siewert type due to unavailable information  
41 176 from SEER database; therefore we encourage further studies to pay special attention on tumor  
42 177 location.

43  
44  
45  
46  
47  
48  
49  
50 178 LNR and LODDS have been proved to be the strongest indicators of survival in gastric  
51 179 adenocarcinoma when LN harvest is inadequate (16, 17). It is demonstrated that in general, more  
52 180 LN resected is associated with better survival, which may be the result of either improved N  
53 181 classification or a therapeutic effect of lymphadenectomy. For esophageal cancer, worldwide data  
54 182 shows that yielding 10 nodes for pT1, 20 for pT2, and 30 or more for pT3/T4 is recommended for  
55 183 maximum 5-year survival (23). For GC, greater LN harvest also shows improved survival (24). It  
56 184 is suggested that at least 16 nodes be assessed pathologically and evaluation of more than 30  
57 185 nodes is desirable (25). Overall it is encouraged to harvest as many LN as possible, balancing the

186 extent of LN resection necessary for accurate N staging and maximum survival without  
187 unnecessarily increasing the morbidity of radical lymphadenectomy. Nevertheless, many  
188 conditions would lead to insufficient LN harvest. It is estimated that only one fifth GC patients  
189 have sufficient LN examined in Iran (26), while more than 15 LNs are examined in 64% of  
190 patients in the US (25). The LNR and LODDS staging methods do not require adequate number of  
191 LN assessment. In fact, the new N category method is stable when nodal assessment is insufficient  
192 during surgery not only for GC (8, 15-17) but also for colorectal cancer (27), esophageal cancer  
193 (28), oral squamous cell carcinoma (29), gallbladder cancer (30), etc.

194 One limitation of this study is that the recruited patients were diagnosed during 2010-2015 and  
195 staged based on TNM 7<sup>th</sup> edition that defined 3 N categories. In 8<sup>th</sup> edition, N category of GC  
196 includes N1, N2, N3a and N3b, which improves survival prediction in patients with junctional  
197 cancer (22). So whether LNR or LODDS based staging system outperforms TNM 8<sup>th</sup> edition  
198 needs to be further investigated. Another limitation is that our results are based on training set and  
199 confirmed by validating set; however the features of the two groups are similar. So this finding  
200 needs to be proved among populations with distinct features.

201 In conclusion, LNR and LODDS staging methods have better prognostic efficacy than traditional  
202 N staging method in CGA patients with regional node metastasis. Besides, the two values are  
203 promising substitute for N staging in nomogram development when other independent prognostic  
204 factors are incorporated.

205 **a. Contributorship statement:** WXQ work conception, data interpretation, critical review for  
206 important content, final approval of the manuscript and agreement to be accountable for all  
207 aspects of the work; BM administrative work, funding, critical review for important content,  
208 final approval of the manuscript and agreement to be accountable for all aspects of the work;  
209 ZC acquisition, analysis of data, drafting the work, final approval of the manuscript and  
210 agreement to be accountable for all aspects of the work.

211 **b. Competing interests:** None.

212 **c. Funding:** This work was supported by [Major Project of Natural Science of Anhui Provincial  
213 Department of Education] grant number [KJ2019ZD73].

214 **d. Data sharing statement:** Dataset available from the SEER website  
215 (<https://seer.cancer.gov/data-software/>).

216  
217 **Acknowledgement:** We thank all patient advisers for their special contribution.

## 218 219 **References:**

- 220 1. Bray F, Ferlay J, Soerjomataram I, Siegel RL, Torre LA, Jemal A. Global cancer statistics 2018:  
221 GLOBOCAN estimates of incidence and mortality worldwide for 36 cancers in 185 countries. *CA*  
222 *Cancer J Clin.* [Journal Article]. 2018 2018-11-01;68(6):394-424.
- 223 2. Abdi E, Latifi-Navid S, Zahri S, Yazdanbod A, Pourfarzi F. Risk factors predisposing to cardia  
224 gastric adenocarcinoma: Insights and new perspectives. *Cancer Med.* [Journal Article; Research  
225 Support, Non-U.S. Gov't; Review]. 2019 2019-10-01;8(13):6114-26.
- 226 3. Amini N, Spolverato G, Kim Y, Squires MH, Poultsides GA, Fields R, et al. Clinicopathological  
227 features and prognosis of gastric cardia adenocarcinoma: a multi-institutional US study. *J SURG*  
228 *ONCOL.* [Comparative Study; Journal Article; Multicenter Study]. 2015 2015-03-01;111(3):285-92.

- 229 4. Sobin L, Gospodarowicz M, Wittekind C. TNM classification of malignant tumours. 7th edition.:  
230 Wiley-Blackwell; 2009.
- 231 5. Edge S, Byrd D, Compton C, Fritz A, Greene F, Trotti A. AJCC cancer staging manual. 7th  
232 edition.: Springer; 2009.
- 233 6. Hou Y, Wang X, Chen J. Prognostic significance of metastatic lymph node ratio: the lymph node  
234 ratio could be a prognostic indicator for patients with gastric cancer. *WORLD J SURG ONCOL.*  
235 [Journal Article]. 2018 2018-10-04;16(1):198.
- 236 7. Zhu J, Xue Z, Zhang S, Guo X, Zhai L, Shang S, et al. Integrated analysis of the prognostic role  
237 of the lymph node ratio in node-positive gastric cancer: A meta-analysis. *INT J SURG.* [Journal Article;  
238 Meta-Analysis; Review]. 2018 2018-09-01;57:76-83.
- 239 8. Sun Z, Xu Y, Li DM, Wang ZN, Zhu GL, Huang BJ, et al. Log odds of positive lymph nodes: a  
240 novel prognostic indicator superior to the number-based and the ratio-based N category for gastric  
241 cancer patients with R0 resection. *CANCER-AM CANCER SOC.* [Journal Article; Research Support,  
242 Non-U.S. Gov't]. 2010 2010-06-01;116(11):2571-80.
- 243 9. Zhao E, Zhou C, Chen S. Prognostic nomogram based on log odds of positive lymph nodes for  
244 gastric carcinoma patients after surgical resection. *FUTURE ONCOL.* [Journal Article]. 2019  
245 2019-12-01;15(36):4207-22.
- 246 10. Gu P, Deng J, Sun Z, Wang Z, Wang W, Liang H, et al. Superiority of log odds of positive lymph  
247 nodes (LODDS) for prognostic prediction after gastric cancer surgery: a multi-institutional analysis of  
248 7620 patients in China. *SURG TODAY.* [Journal Article]. 2021 2021-01-01;51(1):101-10.
- 249 11. Surveillance, Epidemiology, and End Results (SEER) Program ([www.seer.cancer.gov](http://www.seer.cancer.gov))  
250 SEER\*Stat Database: Incidence - SEER Research Data, 18 Registries, Nov 2019 Sub (2000-2017) -  
251 Linked To County Attributes - Time Dependent (1990-2017) Income/Rurality, 1969-2018 Counties,  
252 National Cancer Institute, DCCPS, Surveillance Research Program, released April 2020, based on the  
253 November 2019 submission..
- 254 12. Yu Y, Zhang P, Yao R, Wang J, Wang P, Xue X, et al. Prognostic value of log odds of positive  
255 lymph nodes in node-positive lung squamous cell carcinoma patients after surgery: a SEER  
256 population-based study. *Transl Lung Cancer Res.* [Journal Article]. 2020 2020-08-01;9(4):1285-301.
- 257 13. Camp RL, Dolled-Filhart M, Rimm DL. X-tile: a new bio-informatics tool for biomarker  
258 assessment and outcome-based cut-point optimization. *CLIN CANCER RES.* [Journal Article;  
259 Research Support, Non-U.S. Gov't; Research Support, U.S. Gov't, Non-P.H.S.; Research Support, U.S.  
260 Gov't, P.H.S.]. 2004 2004-11-01;10(21):7252-9.
- 261 14. Iasonos A, Schrag D, Raj GV, Panageas KS. How to build and interpret a nomogram for cancer  
262 prognosis. *J CLIN ONCOL.* [Journal Article; Review]. 2008 2008-03-10;26(8):1364-70.
- 263 15. Jian-Hui C, Shi-Rong C, Hui W, Si-le C, Jian-Bo X, Er-Tao Z, et al. Prognostic value of three  
264 different lymph node staging systems in the survival of patients with gastric cancer following D2  
265 lymphadenectomy. *Tumour Biol.* [Journal Article]. 2016 2016-08-01;37(8):11105-13.
- 266 16. Aurello P, Petrucciani N, Nigri GR, La Torre M, Magistri P, Tierno S, et al. Log odds of positive  
267 lymph nodes (LODDS): what are their role in the prognostic assessment of gastric adenocarcinoma? *J*  
268 *GASTROINTEST SURG.* [Comparative Study; Journal Article]. 2014 2014-07-01;18(7):1254-60.
- 269 17. Kilic MO, Gundogdu SB, Ozden S, Saylam B, Tez M. The prognostic value of different node  
270 staging systems in patients with  $\leq 15$  lymph nodes following surgery for gastric adenocarcinoma.  
271 *ACTA CHIR BELG.* [Journal Article]. 2018 2018-02-01;118(1):1-6.
- 272 18. Suh YS, Han DS, Kong SH, Lee HJ, Kim YT, Kim WH, et al. Should adenocarcinoma of the

- 1  
2  
3 273 esophagogastric junction be classified as esophageal cancer? A comparative analysis according to the  
4 274 seventh AJCC TNM classification. *ANN SURG*. [Comparative Study; Journal Article; Research  
5 275 Support, Non-U.S. Gov't]. 2012 2012-05-01;255(5):908-15.
- 6 276 19. Huang Q, Shi J, Feng A, Fan X, Zhang L, Mashimo H, et al. Gastric cardiac carcinomas involving  
7 277 the esophagus are more adequately staged as gastric cancers by the 7th edition of the American Joint  
8 278 Commission on Cancer Staging System. *Mod Pathol*. [Journal Article; Research Support, Non-U.S.  
9 279 Gov't; Validation Study]. 2011 2011-01-01;24(1):138-46.
- 10 280 20. Amin M, Edge S, Greene F, Byrd D, Brookland R. *AJCC cancer staging manual*. 8th edition.:  
11 281 Springer; 2016.
- 12 282 21. Liu K, Feng F, Chen XZ, Zhou XY, Zhang JY, Chen XL, et al. Comparison between gastric and  
13 283 esophageal classification system among adenocarcinomas of esophagogastric junction according to  
14 284 AJCC 8th edition: a retrospective observational study from two high-volume institutions in China.  
15 285 *GASTRIC CANCER*. [Comparative Study; Journal Article; Observational Study]. 2019  
16 286 2019-05-01;22(3):506-17.
- 17 287 22. Karstens KF, Ghadban T, Sawez S, Konczalla L, Woestemeier A, Bachmann K, et al. Comparison  
18 288 of the 8th UICC staging system for esophageal and gastric cancers in Siewert type II junctional  
19 289 adenocarcinomas. *Eur J Surg Oncol*. [Comparative Study; Journal Article]. 2020 2020-04-01;46(4 Pt  
20 290 A):638-43.
- 21 291 23. Rizk NP, Ishwaran H, Rice TW, Chen LQ, Schipper PH, Kesler KA, et al. Optimum  
22 292 lymphadenectomy for esophageal cancer. *ANN SURG*. [Journal Article; Research Support, Non-U.S.  
23 293 Gov't]. 2010 2010-01-01;251(1):46-50.
- 24 294 24. Macalindong SS, Kim KH, Nam BH, Ryu KW, Kubo N, Kim JY, et al. Effect of total number of  
25 295 harvested lymph nodes on survival outcomes after curative resection for gastric adenocarcinoma:  
26 296 findings from an eastern high-volume gastric cancer center. *BMC CANCER*. [Journal Article;  
27 297 Research Support, Non-U.S. Gov't]. 2018 2018-01-12;18(1):73.
- 28 298 25. Schoenleber SJ, Schnelldorfer T, Wood CM, Qin R, Sarr MG, Donohue JH. Factors influencing  
29 299 lymph node recovery from the operative specimen after gastrectomy for gastric adenocarcinoma. *J*  
30 300 *GASTROINTEST SURG*. [Journal Article]. 2009 2009-07-01;13(7):1233-7.
- 31 301 26. Khanjani N, Mirzaei S, Nasrolahi H, Hamed SH, Mosalaei A, Omidvari S, et al. Insufficient  
32 302 lymph node assessment in gastric adenocarcinoma. *J Egypt Natl Canc Inst*. [Journal Article]. 2019  
33 303 2019-10-22;31(1):2.
- 34 304 27. Pei JP, Zhang CD, Fan YC, Dai DQ. Comparison of Different Lymph Node Staging Systems in  
35 305 Patients With Resectable Colorectal Cancer. *FRONT ONCOL*. [Journal Article]. 2018  
36 306 2018-01-20;8:671.
- 37 307 28. Cao J, Yuan P, Ma H, Ye P, Wang Y, Yuan X, et al. Log Odds of Positive Lymph Nodes Predicts  
38 308 Survival in Patients After Resection for Esophageal Cancer. *ANN THORAC SURG*. [Journal Article;  
39 309 Multicenter Study]. 2016 2016-08-01;102(2):424-32.
- 40 310 29. Jin W, Zhu Z, Wu Y, Ding X, Wu H, Song X, et al. Prognostic value of log odds of positive  
41 311 lymph nodes in patients with resectable oral squamous cell carcinoma. *ORAL ONCOL*. [Journal  
42 312 Article; Research Support, Non-U.S. Gov't]. 2020 2020-09-01;108:104709.
- 43 313 30. Li J, Sun Y, Zhao B, Tang C, Fan D, Jiang W, et al. Lymph Node Ratio-Based Staging System for  
44 314 Gallbladder Cancer With Fewer Than Six Lymph Nodes Examined. *FRONT ONCOL*. [Journal  
45 315 Article]. 2020 2020-01-20;10:542005.
- 46  
47  
48  
49  
50  
51  
52  
53  
54  
55  
56  
57  
58  
59 316  
60

1  
2  
3  
4  
5  
6  
7  
8  
9  
10  
11  
12  
13  
14  
15  
16  
17  
18  
19  
20  
21  
22  
23  
24  
25  
26  
27  
28  
29  
30  
31  
32  
33  
34  
35  
36  
37  
38  
39  
40  
41  
42  
43  
44  
45  
46  
47  
48  
49  
50  
51  
52  
53  
54  
55  
56  
57  
58  
59  
60

317 **Illustrations**

318 Figure 1. Flow diagram of patient selection and grouping.

319 Figure 2. Survival curves of training and validating sets by different staging systems.

320 Figure 3. Construction and validation of nomogram based on Tumor-Lymph node ratio-Metastasis  
321 staging system. B) Internal validation; C) External validation.

322 Figure 4. Construction and validation of nomogram based on Tumor-Log odds of positive lymph  
323 node-Metastasis staging system. B) Internal validation; C) External validation.

For peer review only

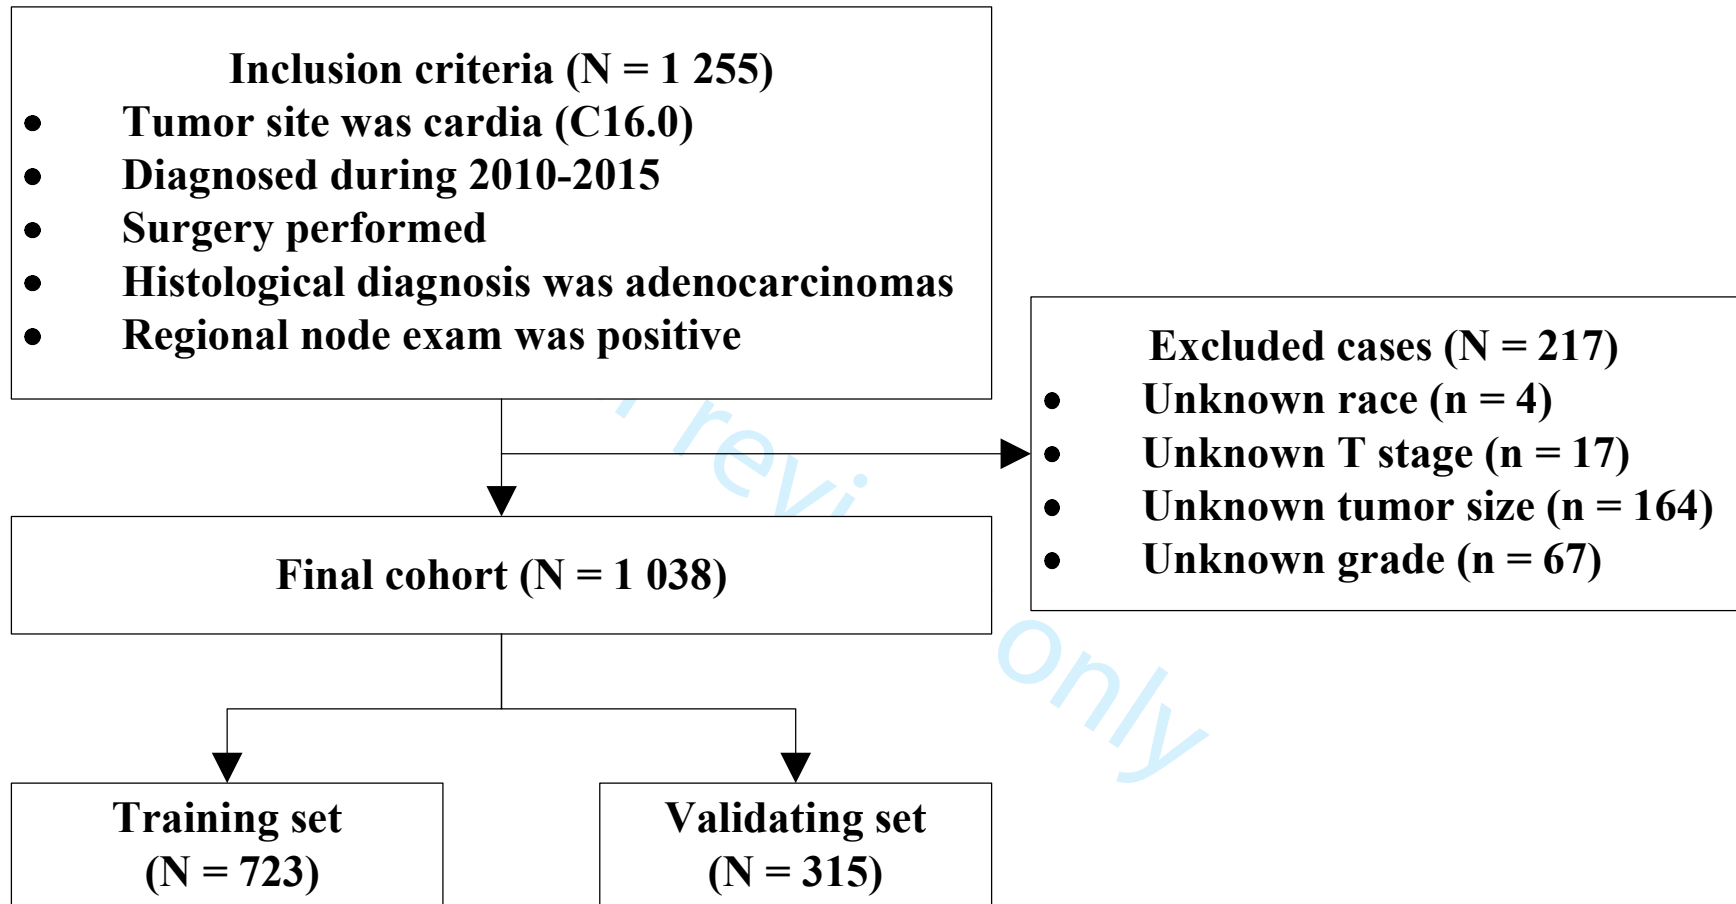



# Training Set

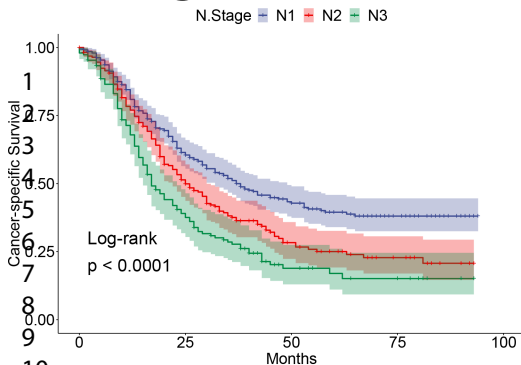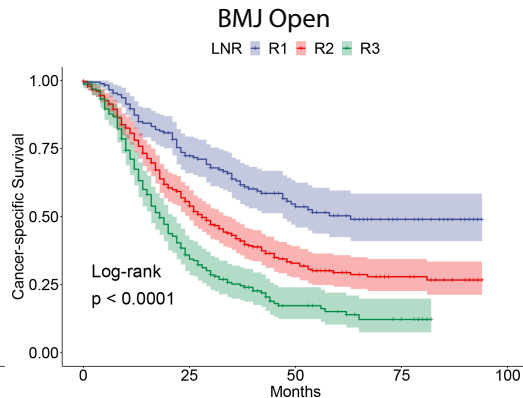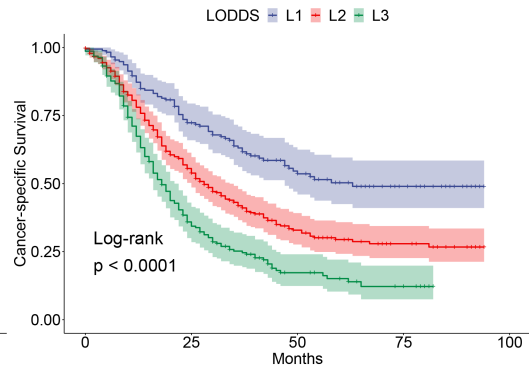

# Validating Set

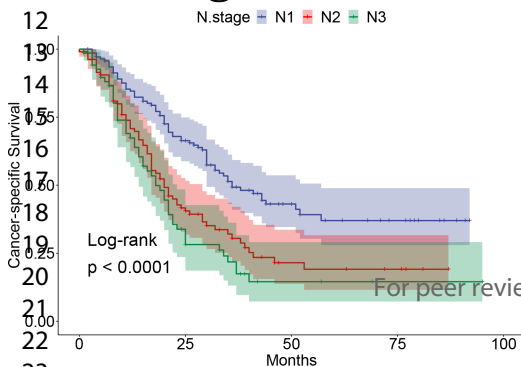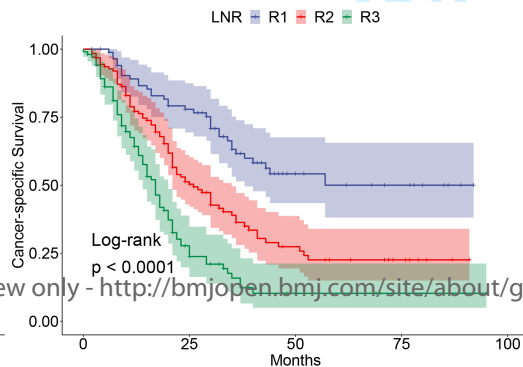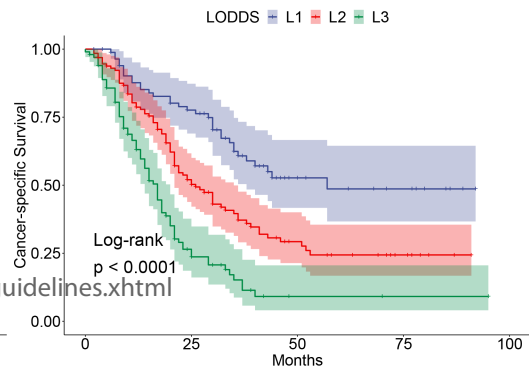

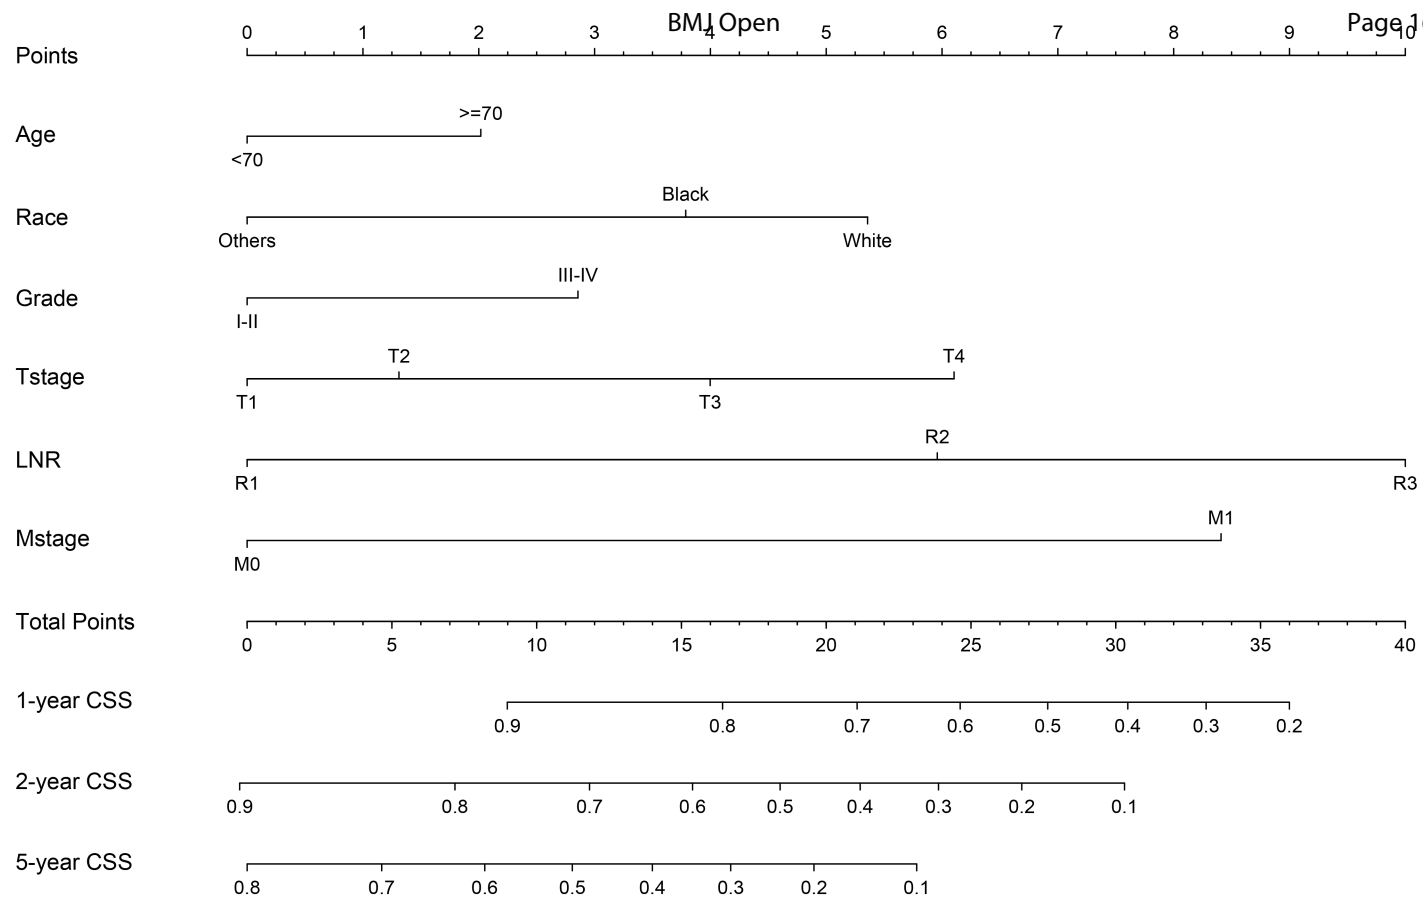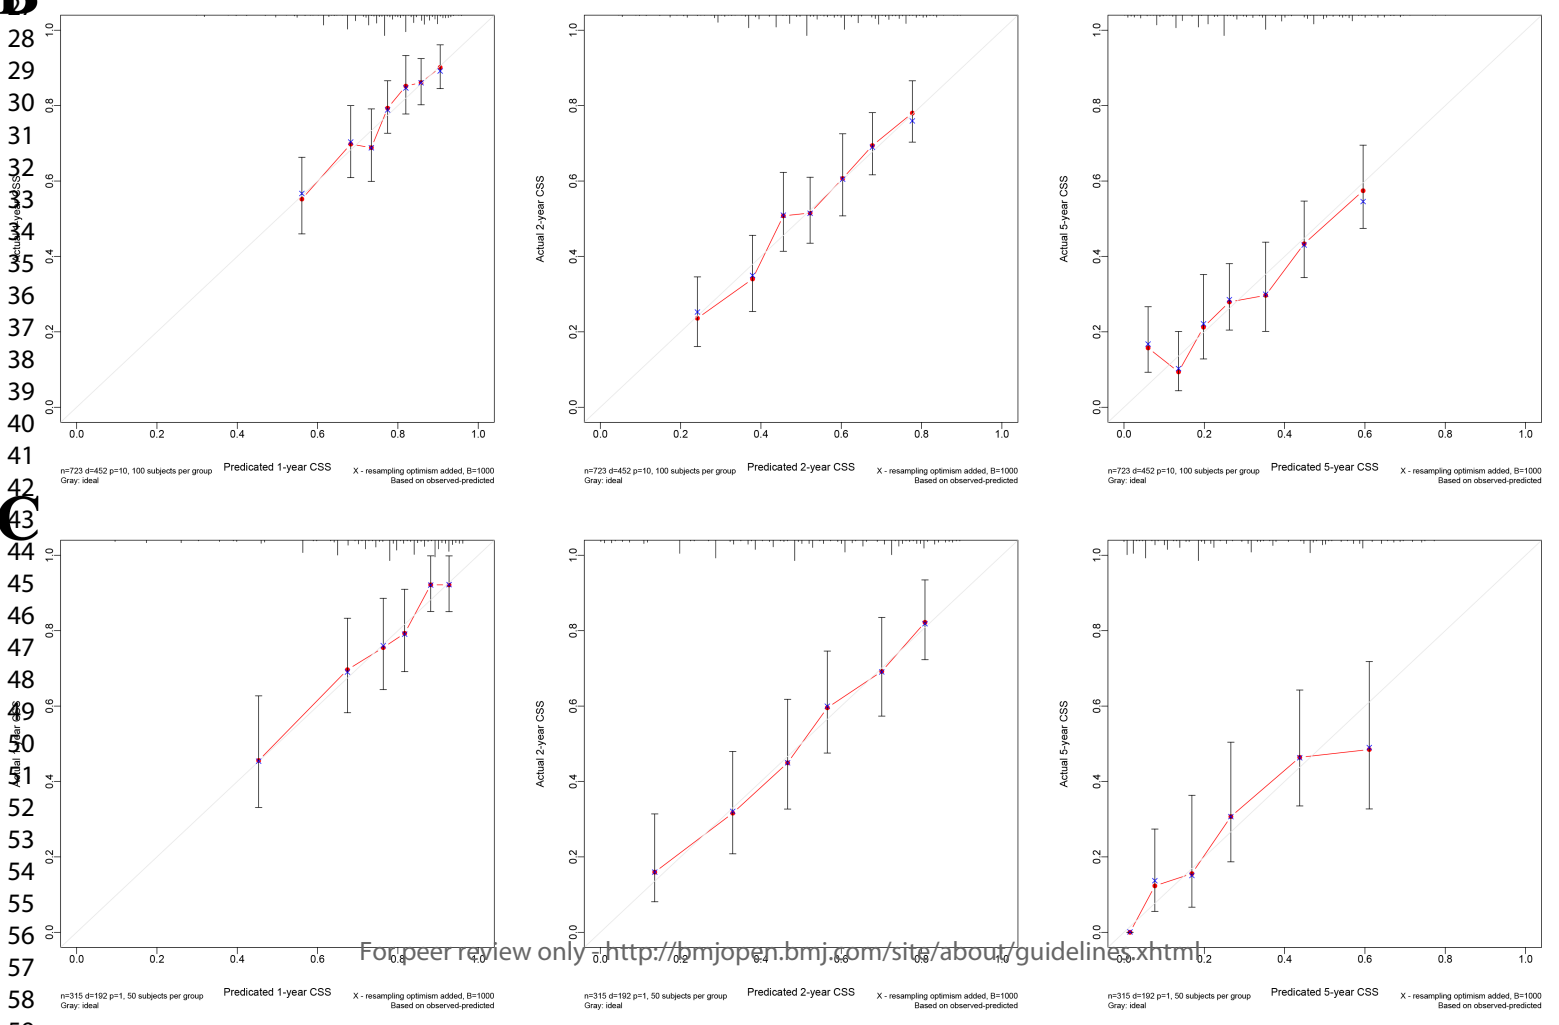

- 1 Age
- 2
- 3
- 4 Race
- 5
- 6 Grade
- 7
- 8
- 9 Tstage
- 10
- 11 LODDS
- 12
- 13
- 14 Mstage
- 15
- 16 Total Points
- 17
- 18
- 19 1-year CSS
- 20
- 21
- 22 2-year CSS
- 23
- 24 5-year CSS
- 25

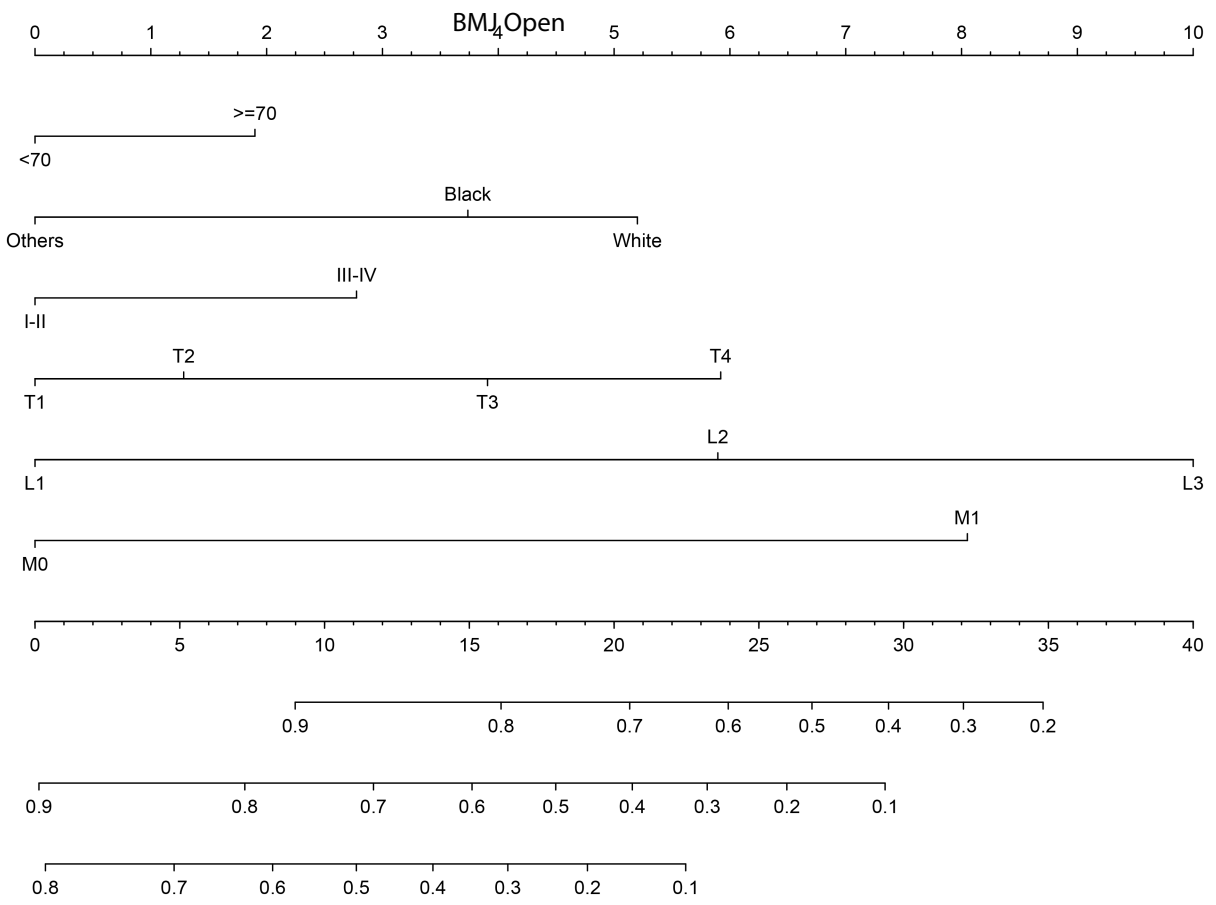

**B**

- 28
- 29
- 30
- 31
- 32
- 33
- 34
- 35
- 36
- 37
- 38
- 39
- 40
- 41
- 42

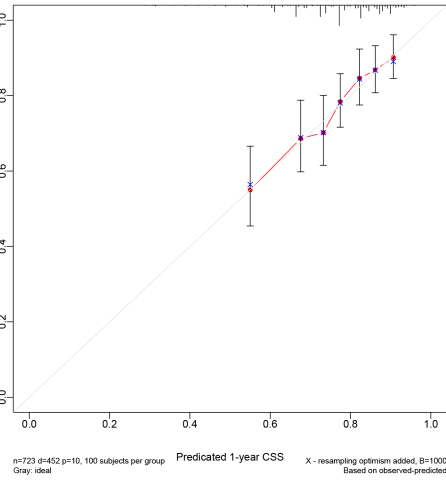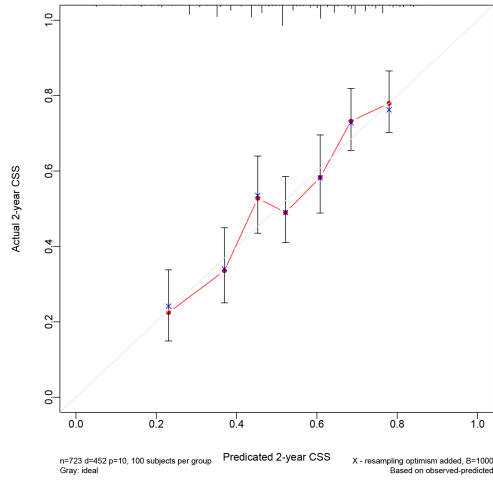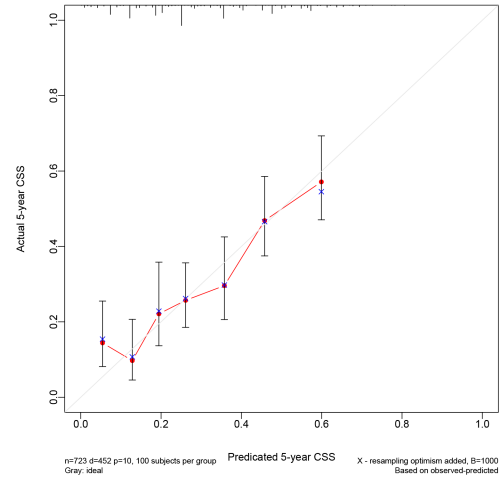

**C**

- 43
- 44
- 45
- 46
- 47
- 48
- 49
- 50
- 51
- 52
- 53
- 54
- 55
- 56
- 57
- 58
- 59

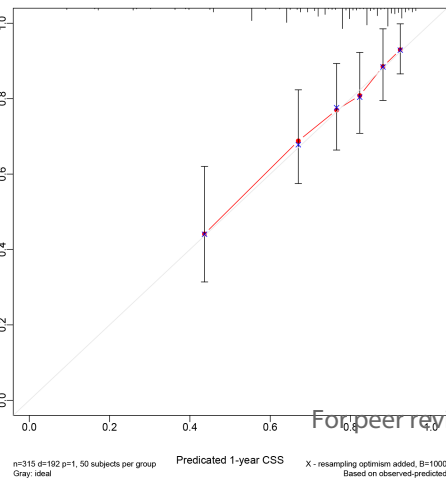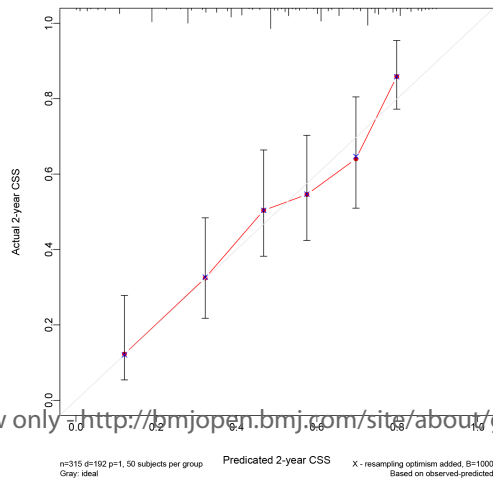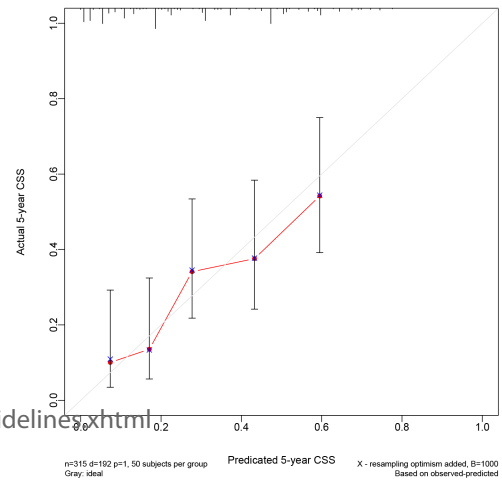

# BMJ Open

## Prognostic value of different lymph node staging methods for node positive cardia gastric cancer: a register-based retrospective cohort study

|                                 |                                                                                                                                                  |
|---------------------------------|--------------------------------------------------------------------------------------------------------------------------------------------------|
| Journal:                        | <i>BMJ Open</i>                                                                                                                                  |
| Manuscript ID                   | bmjopen-2021-050378.R1                                                                                                                           |
| Article Type:                   | Original research                                                                                                                                |
| Date Submitted by the Author:   | 18-Jun-2021                                                                                                                                      |
| Complete List of Authors:       | Wang, Xiao-Qing; Anhui Medical College<br>Bao, Min; Anhui Medical College<br>Zhang, Cheng; First Affiliated Hospital of Anhui Medical University |
| <b>Primary Subject Heading</b>: | Oncology                                                                                                                                         |
| Secondary Subject Heading:      | Gastroenterology and hepatology                                                                                                                  |
| Keywords:                       | Gastrointestinal tumours < ONCOLOGY, Gastrointestinal tumours < GASTROENTEROLOGY, SURGERY                                                        |
|                                 |                                                                                                                                                  |

SCHOLARONE™  
Manuscripts



I, the Submitting Author has the right to grant and does grant on behalf of all authors of the Work (as defined in the below author licence), an exclusive licence and/or a non-exclusive licence for contributions from authors who are: i) UK Crown employees; ii) where BMJ has agreed a CC-BY licence shall apply, and/or iii) in accordance with the terms applicable for US Federal Government officers or employees acting as part of their official duties; on a worldwide, perpetual, irrevocable, royalty-free basis to BMJ Publishing Group Ltd ("BMJ") its licensees and where the relevant Journal is co-owned by BMJ to the co-owners of the Journal, to publish the Work in this journal and any other BMJ products and to exploit all rights, as set out in our [licence](#).

The Submitting Author accepts and understands that any supply made under these terms is made by BMJ to the Submitting Author unless you are acting as an employee on behalf of your employer or a postgraduate student of an affiliated institution which is paying any applicable article publishing charge ("APC") for Open Access articles. Where the Submitting Author wishes to make the Work available on an Open Access basis (and intends to pay the relevant APC), the terms of reuse of such Open Access shall be governed by a Creative Commons licence – details of these licences and which [Creative Commons](#) licence will apply to this Work are set out in our licence referred to above.

Other than as permitted in any relevant BMJ Author's Self Archiving Policies, I confirm this Work has not been accepted for publication elsewhere, is not being considered for publication elsewhere and does not duplicate material already published. I confirm all authors consent to publication of this Work and authorise the granting of this licence.

1  
2  
3  
4  
5  
6  
7  
8  
9  
10  
11  
12  
13  
14  
15  
16  
17  
18  
19  
20  
21  
22  
23  
24  
25  
26  
27  
28  
29  
30  
31  
32  
33  
34  
35  
36  
37  
38  
39  
40  
41  
42  
43  
44  
45  
46  
47  
48  
49  
50  
51  
52  
53  
54  
55  
56  
57  
58  
59  
60

1 **Title page**

2 **Article title:** Prognostic value of different lymph node staging methods for node positive cardia  
3 gastric cancer: a register-based retrospective cohort study

4 **Author information:** Xiao-Qing Wang 1, Min Bao 1, Cheng Zhang 2

5 1 Anhui Medical College, Hefei, Anhui, China PR

6 2 Anhui Provincial Cancer Institute, the First Affiliated Hospital of Anhui Medical University,  
7 Hefei, Anhui, China PR

8 Corresponding to: Cheng Zhang, [ahmuzc@sina.cn](mailto:ahmuzc@sina.cn)

9 **Disclaimer:** The views expressed in the submitted article are our own and not an official position  
10 of the institution or funder.

11 **Word count:** 3191 (excluding its abstract, acknowledgments, tables, figure legends, and  
12 references) abstract 281 .

13 **Number of figures and tables:** This draft included 3 figures and 2 tables.

14 **Disclosure of relationships and activities:** None.

1  
2  
3  
4  
5  
6  
7  
8  
9  
10  
11  
12  
13  
14  
15  
16  
17  
18  
19  
20  
21  
22  
23  
24  
25  
26  
27  
28  
29  
30  
31  
32  
33  
34  
35  
36  
37  
38  
39  
40  
41  
42  
43  
44  
45  
46  
47  
48  
49  
50  
51  
52  
53  
54  
55  
56  
57  
58  
59  
60

15 **Abstract**

16 Objective: To investigate the prognostic efficacy of lymph node ratio (LNR) and log odds of  
17 positive lymph nodes (LODDS) in node positive cardia gastric adenocarcinoma (CGA).

18 Design: A register-based retrospective cohort study.

19 Participants: A total of 1 038 patients with node positive CGA were enrolled from SEER database,  
20 and randomly assigned (7:3) in training set (N = 723) or validating set (N = 315).

21 Interventions: The major endpoint was cancer specific survival (CSS). Optimal cut-off values  
22 were determined by X-tile software. The prognostic power was evaluated using Akaike  
23 Information Criterion (AIC) and Harrell concordance index (C-index). Cox stepwise regression  
24 analysis was performed to construct nomogram for prediction of 1-, 2-, and 5-year CSS. The  
25 prediction model was further evaluated by calibration curve, receiver operator characteristic (ROC)  
26 curve and decision curve analysis (DCA) plot.

27 Results: The training set and validating set are similar in terms of clinical and demographic  
28 features. The optimal cut-off values for LNR were 0.09 and 0.33, and for LODDS were -2.09 and  
29 -0.65. CSS was significantly different by N, LNR and LODDS categories. The C-index of N stage  
30 was lower than that of LNR or LODDS. The AIC of N stage was higher than that of LNR or  
31 LODDS. Independent predictors included race, T stage, M stage and LNR (or LODDS) and they  
32 were incorporated in nomograms for 1-, 2- and 5-year CSS prediction. Calibration plots showed  
33 satisfied results of internal and external validity of the nomogram.

34 Conclusions: LNR and LODDS staging methods have better prognostic efficacy than traditional N  
35 staging method in CGA patients with node metastasis. Besides, the two values are promising  
36 substitute for N staging in nomogram development when other independent prognostic factors are  
37 incorporated.

38  
39 Key words: Cardia; Adenocarcinoma; Stomach Neoplasms; Lymph Node Ratio; Neoplasm  
40 Staging

1  
2  
3  
4  
5  
6  
7  
8  
9  
10  
11  
12  
13  
14  
15  
16  
17  
18  
19  
20  
21  
22  
23  
24  
25  
26  
27  
28  
29  
30  
31  
32  
33  
34  
35  
36  
37  
38  
39  
40  
41  
42  
43  
44  
45  
46  
47  
48  
49  
50  
51  
52  
53  
54  
55  
56  
57  
58  
59  
60

41 **Strengths and limitations of this study**

- 42 ● This study used national cancer registry data for cardia gastric adenocarcinoma research;
- 43 ● Novel staging methods based on the number of positive lymph node was established for  
44 prognostic prediction;
- 45 ● Nomograms based on the new staging methods were constructed and validated;
- 46 ● This study needs to be confirmed by other populations.

47 **Patient consent form:** The SEER database review is granted exemption from obtaining patients'  
48 consents.

49 **Word count:** 3191 (excluding its abstract, acknowledgments, tables, figure legends, and  
50 references) abstract 281.

For peer review only



## 51 Introduction

52 Gastric cancer (GC) generally includes 2 topographical categories: non-cardia GC that arises from  
53 more distant sites and cardia GC that arises in gastroesophageal junction (GEJ). In contrast to  
54 steady decline of non-cardia GC incidence, cardia GC occurs more frequently, particular in  
55 high-income countries (1, 2). This trend is associated with obesity, gastroesophageal reflux  
56 disease (GERD), and Barrett esophagus (2). In addition to different incidence trend,  
57 clinicalpathological feature and long-term survival vary between the two GC subtypes (3). For  
58 accurate prediction of survival, precise staging is required. The Tumor-Node-Metastasis (TNM)  
59 classification 7<sup>th</sup> edition by the American Joint Committee on Cancer (AJCC) recommends at least  
60 15 lymph nodes (LN) collection for N staging (4, 5). However inadequate LN harvest frequently  
61 occurs due to many conditions, thus precise staging cannot be obtained sometimes. It has been  
62 demonstrated that LN ratio (LNR) could better estimate survival of GC patients after curative  
63 gastrectomy, regardless of the number of LN examined (6), and may be promising for aiding  
64 TNM staging system (7). Apart from that, log odds of positive LN (LODDS) outperformed N and  
65 LNR staging system when predicting survival of GC patients (8-10). Therefore the traditional N  
66 staging classification may be substituted with different methods, with even improved performance.  
67 Nevertheless little evidence evaluates the performance of the two LN staging systems  
68 aforementioned in cardia GC, since it has distinct clinical characteristics and epidemiology from  
69 overall GC.

70 Here we use nationwide cancer registry data to appraise the prognostic value of LNR and LODDS  
71 in patients with node positive cardia gastric adenocarcinoma (CGA), and, if possible, construct  
72 nomogram for survival prediction based on the new LN staging system.

## 73 Methods

### 74 *Study design and Participants Selection*

75 This study is a SEER register-based retrospective cohort study, which aimed to enroll patients  
76 with node positive cardia gastric adenocarcinoma (CGA), review crucial clinical characteristics  
77 and observe survival of this population. The source of SEER data is registered cancer cases from  
78 various locations throughout the United States. The permission of data access was obtained by  
79 sending application form and receiving confirmation mail with valid username (21268-Nov2019)  
80 and password.

81 We used SEER\*Stat (version 8.3.8) to access to Incidence - SEER Research Data, 18 Registries,  
82 Nov 2019 Sub 2000-2017 (SEER 18 database) (11) for collection of node positive CGA patients.  
83 The inclusion criteria were as follows: 1) the International Classification of Disease for Oncology,  
84 Third Edition (ICD-O-3) for primary tumor site was C16.0 (cardia); 2) broad histological recode  
85 was 8140-8389: adenomas and adenocarcinomas; 3) diagnostic confirmation was positive  
86 histology; 4) surgery was performed; 5) diagnosed during 2010-2015; 6) the definite number of  
87 regional positive nodes was clear and not zero. We excluded cases with unknown race, T stage  
88 information, tumor size and grade. As shown in Figure 1, the final cohort enrolled 1 038 patients  
89 with node positive CGA, of whom 857 were male and 181 were female. Three hundred and thirty  
90 eight (32.56%) were over 70 years old. Eight hundred and ninety six (86.32%) were white, 64  
91 were black and 78 were other races. Next 70% of the entire patients were randomly assigned to

1  
2  
3 92 training set (N = 723) and the rest was assigned to validating set (N = 315).  
4

### 5 93 ***Technical Information***

6  
7 94 The main outcome was cancer specific survival (CSS), which was referred to as death specifically  
8 95 due to CGA and the period between first diagnosis and death. In addition, we extracted the  
9 96 following variables for analysis: sex, race, age, AJCC 7<sup>th</sup> TNM stage information, tumor size,  
10 97 grade, number of regional nodes examined and number of regional nodes positive. The stage  
11 98 information was further corrected according to AJCC 8<sup>th</sup> criteria. LNR and LODDS were  
12 99 calculated as previously reported (12). Briefly, LNR was defined as the ratio of the number of  
13 100 positive nodes divided by the total number of examined nodes. LODDS was calculated using the  
14 101 formula:  $\log(\text{NPLN}+0.50)/(\text{NDLN}-\text{NPLN}+0.50)$ , in which 0.50 was added to both the numerator  
15 102 and denominator to avoid an infinite number.

16  
17  
18  
19 103 The optimal thresholds for cutting LNR and LODDS into trichotomous variables were determined  
20 104 by X-tile software (version 3.6.1) (13), which were based on the maximal log-rank chi-square  
21 105 value that represented the greatest group difference of CSS probability. LNR and LODDS were  
22 106 cut into 3 levels because they are proposed as the alternative indicators for N stage in node  
23 107 positive GC that included N1, N2 and N3.

### 24 108 ***Statistics***

25  
26  
27 109 The distributions of baseline features between training set and validating set were described and  
28 110 compared by chi-square test. Survival curves, median survival and CSS rates were generated using  
29 111 the Kaplan-Meier method. Outcome difference between groups was analyzed by the log-rank test.  
30 112 After testing proportional hazard assumption, multivariable Cox regression model was used to  
31 113 establish prognostic model for CSS. The prognostic power was evaluated using Akaike  
32 114 Information Criterion (AIC) and Harrell concordance index (C-index). A predictive model with  
33 115 lower AIC indicated better model fit, while with higher C-index indicated better discriminative  
34 116 ability. A value of C-index of 0.5 indicates no predictive power, and an index of 1.0 indicates  
35 117 complete differentiation. Cox stepwise regression analysis was also performed to construct  
36 118 nomogram for prediction of 1-, 2-, and 5-year CSS. Validation of nomogram was performed by  
37 119 internal and external calibration plots (14). Bootstraps with 1 000 resample were used for  
38 120 validation activities. Receiver operator characteristic (ROC) curves and areas under the ROC  
39 121 curves (AUCs) were calculated to evaluate how accurately the CSS was predicted by different  
40 122 models. Decision curve analysis (DCA) was performed to determine the clinical application of  
41 123 different model: the proportion of true positive results minus the proportion of false positive  
42 124 results, and then, the relative risks of false positive and false negative results were weighted to  
43 125 obtain the net benefits of decision-making. All statistical analyses were performed using R  
44 126 software (version 3.5.3). A two-tailed P value of less than 0.05 was considered statistically  
45 127 significant.

### 46 128 ***Patient and Public Involvement***

47  
48 129 The development of the research question and outcome measures were not informed by patients'  
49 130 priorities, experience, and preferences. The patients were involved during the retrospective review  
50 131 of public database where cases were diagnosed during 2010-2015. Patients were not involved in  
51 132 the recruitment to and conduct of the study. The findings of the study will be disseminated by

133 online article to all study participants whose identity kept confidential during the whole research.

134 ***Ethics approval statement***

135 The Ethics committee(s) and IRB name: the Ethics Committee of Anhui Medical College; Reason  
136 for exemption: The observational nature of the study

137 **Results**

138 Table 1 summarized the demographic and clinical feature of the participants. Six hundred and  
139 twenty eight patients (60.50%) were diagnosed with a tumor less than 5cm. Six hundred and forty  
140 patients (61.66%) were with grade III or IV. The numbers of patients with T1, T2, T3 and T4  
141 respectively were 94, 125, 717 and 102. The numbers of patients with N1, N2 and N3 respectively  
142 were 479, 330 and 229. Seventy five patients (7.23%) were with distant metastasis at presentation.  
143 The median CSS was 27 months. The 1-, 2- and 5-year CSS rates were 76.8%, 53.0% and 29.2%,  
144 respectively. There was no statistical difference of baseline characteristics between training set  
145 and validating set. The detailed information of the two sets was also presented in Table 1.

Table 1. Baseline information of the included patients with node positive CGA, N(%).

| Groups     | Training set<br>(N = 723) | Validating set<br>(N = 315) | P-value |
|------------|---------------------------|-----------------------------|---------|
| Sex        |                           |                             |         |
| Male       | 596 (82.43)               | 261 (82.86)                 | 0.939   |
| Female     | 127 (17.57)               | 54 (17.14)                  |         |
| Age        |                           |                             |         |
| <70        | 490 (67.77)               | 210 (66.67)                 | 0.781   |
| ≥70        | 233 (32.23)               | 105 (33.33)                 |         |
| Race       |                           |                             |         |
| White      | 628 (86.86)               | 268 (85.08)                 | 0.437   |
| Black      | 40 (5.53)                 | 24 (7.62)                   |         |
| Others     | 55 (7.61)                 | 23 (7.30)                   |         |
| Tumor size |                           |                             |         |
| <5cm       | 442 (61.13)               | 186 (59.05)                 | 0.573   |
| ≥5cm       | 281 (38.87)               | 129 (40.95)                 |         |
| Grade      |                           |                             |         |
| I-II       | 279 (38.59)               | 119 (37.78)                 | 0.859   |
| III-IV     | 444 (61.41)               | 196 (62.22)                 |         |
| T stage    |                           |                             |         |
| T1a        | 17 (2.35)                 | 4 (1.27)                    | 0.224   |
| T1b        | 53 (7.33)                 | 20 (6.35)                   |         |
| T2         | 83 (11.48)                | 42 (13.33)                  |         |
| T3         | 501 (69.29)               | 216 (68.57)                 |         |
| T4a        | 49 (6.78)                 | 28 (8.89)                   |         |
| T4b        | 20 (2.77)                 | 5 (1.59)                    |         |
| N stage    |                           |                             |         |
| N1         | 332 (45.92)               | 147 (46.67)                 | 0.921   |

|                          |                   |                   |       |
|--------------------------|-------------------|-------------------|-------|
| N2                       | 229 (31.67)       | 101 (32.06)       |       |
| N3                       | 162 (22.41)       | 67 (21.27)        |       |
| M stage                  |                   |                   |       |
| M0                       | 678 (93.78)       | 285 (90.48)       | 0.079 |
| M1                       | 45 (6.22)         | 30 (9.52)         |       |
| Low nodes yield          |                   |                   |       |
| Yes                      | 532 (73.58)       | 243 (77.14)       | 0.300 |
| No                       | 191 (26.42)       | 72 (22.86)        |       |
| No. of nodes harvest     | 17 (12, 25)       | 16 (11, 24)       | 0.400 |
| No. of positive nodes    | 3 (1, 6)          | 3 (1, 6)          | 1.000 |
| Median survival (months) | 28 (25, 32)       | 25 (21, 32)       | 0.361 |
| CSS rate (%)             |                   |                   |       |
| 1-year                   | 77.0 (74.0, 80.2) | 76.3 (71.6, 81.2) |       |
| 2-year                   | 53.7 (50.1, 57.5) | 51.4 (46.0, 57.5) |       |
| 5-year                   | 30.3 (26.7, 34.5) | 26.4 (20.9, 33.4) |       |

Abbreviation: CGA, cardia gastric adenocarcinoma; CSS, cancer-specific survival

146 According to X-tile software results, the optimal cut-off values for LNR were 0.09 and 0.33, and  
 147 for LODDS were -2.09 and -0.65. Thus patients were separated into low (R1), medium (R2) or  
 148 high LNR (R3) group, or low (L1), medium (L2) or high LODDS (L3) group. For model  
 149 optimization, LNR and LODDS were also categorized into trichotomous factors using cut-off  
 150 values of  $P_{25}$  and  $P_{75}$ . The discrimination ability of the model based on interquartile was lower  
 151 (Suppl. Table 1), so this model was not further analyzed. Next we illustrated the survival curves of  
 152 the patients according to N, LNR or LODDS staging system. As shown in Figure 2 training set  
 153 section, CSS was significantly different by all the three staging systems (all the log-rank P values  
 154  $< 0.0001$ ); however the 95% CIs of N2 and N3 survival curve initially separated and partly  
 155 overlapped afterwards. The inferior discriminative ability of N system was further supported by  
 156 AIC and C-index. As shown in Table 2, the C-index of N stage was lower than that of LNR or  
 157 LODDS. Similarly, the AIC of N stage was higher than that of LNR or LODDS. The clinical  
 158 characteristics with statistical significance for CSS were further incorporated in the Cox regression  
 159 model as potential confounders (Suppl. Table 2), and all the variables met proportional hazard  
 160 assumption (Suppl. Figure 1). The prognostic value of adjusted model was better than crude mode  
 161 generally. In addition, the value of LNR system seemed to be worse than LODDS system;  
 162 however the difference was not noticeable, so we considered both of the systems into nomogram  
 163 construction.

Table 2. Prognostic values of variables for patients with node positive CGA (N = 1038).

| Variables                     | Crude model       |         |      | Adjusted model    |         |      |
|-------------------------------|-------------------|---------|------|-------------------|---------|------|
|                               | HR (95% CI)       | C-index | AIC  | HR (95% CI)       | C-index | AIC  |
| <b>Training set (N = 723)</b> |                   |         |      |                   |         |      |
| N stage                       |                   | 0.582   | 5403 |                   | 0.632   | 5365 |
| N1                            | 1 (ref)           |         |      | 1 (ref)           |         |      |
| N2                            | 1.53 (1.24, 1.91) |         |      | 1.42 (1.14, 1.77) |         |      |

|                                 |                   |       |      |                   |       |      |
|---------------------------------|-------------------|-------|------|-------------------|-------|------|
| N3                              | 2.15 (1.70, 2.71) |       |      | 2.03 (1.60, 2.59) |       |      |
| LNR*                            |                   | 0.607 | 5376 |                   | 0.643 | 5350 |
| R1                              | 1 (ref)           |       |      | 1 (ref)           |       |      |
| R2                              | 1.88 (1.44, 2.44) |       |      | 1.74 (1.33, 2.29) |       |      |
| R3                              | 3.02 (2.30, 3.97) |       |      | 2.63 (1.97, 3.50) |       |      |
| LODDS*                          |                   | 0.609 | 5373 |                   | 0.644 | 5346 |
| L1                              | 1 (ref)           |       |      | 1 (ref)           |       |      |
| L2                              | 1.93 (1.48, 2.51) |       |      | 1.80 (1.36, 2.37) |       |      |
| L3                              | 3.13 (2.38, 4.13) |       |      | 2.77 (2.07, 3.70) |       |      |
| <b>Validating set (N = 315)</b> |                   |       |      |                   |       |      |
| N stage                         |                   | 0.596 | 1957 |                   | 0.675 | 1931 |
| N1                              | 1 (ref)           |       |      | 1 (ref)           |       |      |
| N2                              | 1.81 (1.31, 2.51) |       |      | 1.75 (1.25, 2.46) |       |      |
| N3                              | 2.18 (1.51, 3.15) |       |      | 2.23 (1.50, 3.30) |       |      |
| LNR*                            |                   | 0.646 | 1927 |                   | 0.691 | 1913 |
| R1                              | 1 (ref)           |       |      | 1 (ref)           |       |      |
| R2                              | 2.20 (1.47, 3.30) |       |      | 1.91 (1.26, 2.90) |       |      |
| R3                              | 4.16 (2.76, 6.28) |       |      | 3.58 (2.30, 5.56) |       |      |
| LODDS*                          |                   | 0.647 | 1927 |                   | 0.789 | 1914 |
| L1                              | 1 (ref)           |       |      | 1 (ref)           |       |      |
| L2                              | 2.07 (1.39, 3.09) |       |      | 2.08 (1.38, 3.14) |       |      |
| L3                              | 4.22 (2.79, 6.39) |       |      | 4.10 (2.65, 6.34) |       |      |

Abbreviations: CGA, cardia gastric adenocarcinoma; HR, hazard ratio; CI, confidence interval; AIC, Akaike information criterion; LNR, lymph node ratio; LODDS, log odds of positive lymph nodes.

Adjusted model considered race, tumor size, grade, T stage and M stage.

\* cut-off values for LNR were 0.09 and 0.33, and for LODDS were -2.09 and -0.65.

164 Stepwise Cox regression analysis showed race, tumor grade, low nodes yield, T stage, M stage  
 165 and LNR (or LODDS) were independent predictors, so these factors were included in nomograms.  
 166 For both LNR and LODDS, the total score was 40, and higher score suggested lower survival  
 167 (Figure 3 and Suppl. Figure 2). Next calibration plot was used to assess the internal and external  
 168 validity of the nomogram (Figure 3 and Suppl. Figure 2). Since the cross-spot line was generally  
 169 close to the grey reference line, we concluded the predicted CSS was well correlated with the  
 170 actual situation. In addition, ROC curves indicated that the AUC of the model based on N stage  
 171 was lower than that of the model based on the nomogram of LNR or LODDS (Suppl. Figure 3).  
 172 DCA plot also showed that the nomogram model was superior to traditional model (Suppl. Figure  
 173 3).

## 174 Discussion

175 The present study analyzes national cancer registry databases and demonstrates that survival of  
 176 patients with node-positive CGA is well predicted when the traditional N staging method is  
 177 substituted with LNR or LODDS system. This finding both exists in training and validating sets.  
 178 In training set, the survival curves separate clearly when patient grouping is implemented by LNR  
 179 or LODDS method, which is not achieved by traditional N staging system. Adjusted model that

1  
2  
3 180 simultaneously considers staging, clinical and demographic features outperforms crude model that  
4 181 only takes staging into account. Therefore multiple independent survival factors are incorporated  
5 182 in nomogram construction, which suggests older age at diagnosis, white, higher grade, greater  
6 183 tumor infiltration, higher proportion of positive LN, and metastasis as risk factors. The  
7 184 nomograms perform steadily in 1-, 2- and 5-year CSS prediction as the validation plots show.

10 185 Previous studies have demonstrated the superiority of LNR or LODDS for prognostic prediction  
11 186 in GC after surgical resection (8-10, 15-17). However the GC patients are not further separated  
12 187 and investigated according to primary tumor site, since there is much difference between cardia  
13 188 and non-cardia GC in terms of tumor features, etiological factors, and biological behaviors (3). In  
14 189 AJCC cancer staging 7<sup>th</sup> edition, tumors involving EGJ was categorized as esophagus cancer (5),  
15 190 which was however argued by the viewpoint that GC staging system has a better ability to predict  
16 191 survival of EGJ tumor (18, 19). In the latest 8<sup>th</sup> edition (20), a tumor that has its epicenter within 2  
17 192 cm of EGJ and involves the EGJ (Siewert type I/II) is classified as esophageal cancer. Other  
18 193 situation, including a tumor with epicenter more than 2 cm from EGJ or a tumor located with 2 cm  
19 194 of EGJ but does not involve EGJ, is classified as stomach cancer. The superiority of the new  
20 195 system is confirmed by a retrospective observational study from two high-volume institutions in  
21 196 China, regardless of Siewert type (21). In terms of Siewert type II junctional adenocarcinoma, a  
22 197 marginal advantage of the esophagus cancer system is found in discriminating survival rates after  
23 198 3 and 5 years, however the advantage of GC system lies in division of the N3 category into N3a  
24 199 and N3b, so the authors concludes neither the esophageal nor the stomach staging system is  
25 200 flawless in predicting survival in Siewert type II junctional cancer (22). Above all, CGA is  
26 201 probably a special entity that has a different biological property compared with genuine gastric  
27 202 and genuine esophageal cancer. To the best of our knowledge, the present study first reveals a  
28 203 superior performance of prognostic prediction based on LNR or LODDS in node positive CGA  
29 204 patients. Unfortunately we are unable to consider Siewert type due to unavailable information  
30 205 from SEER database; therefore we encourage further studies to pay special attention on tumor  
31 206 location.

32  
33  
34  
35  
36  
37  
38  
39  
40 207 LNR and LODDS have been proved to be the strongest indicators of survival in gastric  
41 208 adenocarcinoma when LN harvest is inadequate (16, 17). It is demonstrated that in general, more  
42 209 LN resection is associated with better survival, which may be the result of either improved N  
43 210 classification or a therapeutic effect of lymphadenectomy. For esophageal cancer, worldwide data  
44 211 shows that yielding 10 nodes for pT1, 20 for pT2, and 30 or more for pT3/T4 is recommended for  
45 212 maximum 5-year survival (23). For GC, greater LN harvest also shows improved survival (24). It  
46 213 is suggested that at least 16 nodes be assessed pathologically and evaluation of more than 30  
47 214 nodes is desirable (25). Overall it is encouraged to harvest as many LN as possible, balancing the  
48 215 extent of LN resection necessary for accurate N staging and maximum survival without  
49 216 unnecessarily increasing the morbidity of radical lymphadenectomy. Nevertheless, many  
50 217 conditions would lead to insufficient LN harvest. It is estimated that only one fifth GC patients  
51 218 have sufficient LN examined in Iran (26), while more than 15 LNs are examined in 64% of  
52 219 patients in the US (25). The LNR and LODDS staging methods do not require adequate number of  
53 220 LN assessment. In the present study, low nodes yield is a risk factor for poor survival in univariate  
54 221 analysis; however it loses significance in LNR or LODDS based multivariate model, which  
55 222 indicates that it probably exerts little impact with consideration of LNR or LODDS. In fact, the

223 new node category method is stable when nodal assessment is insufficient during surgery not only  
224 for GC (8, 15-17) but also for colorectal cancer (27), esophageal cancer (28), oral squamous cell  
225 carcinoma (29), gallbladder cancer (30), etc.

226 The association between LNR and survival is an exciting aspect of cardia GC that is currently  
227 emerging and may be clinically meaningful. The higher ratio of positive LN indicates worse  
228 outcome in cardia GC. Patients are at 2-3 folds higher risk of cancer specific death if the ratio is  
229 over 33%. The ratio of 9-33% also indicates a double risk. This effect is independent of other  
230 crucial clinical characteristics, thus providing a useful tool for surgeons to predict the prognosis,  
231 and to be taken as evidence for the surgeon to tend towards truly radical, i.e., complete lymph  
232 node clearance rather than limited clearance (31). In addition, LNR minimizes the “stage  
233 migration” phenomenon that can be observed using the current N staging system (32).

234 One limitation of this study is that some important factors that are associated with survival are not  
235 considered in the model due to unavailable data source. For example, ECOG/KPS score is  
236 commonly taken into account in survival analysis due to its remarkable relationship with general  
237 status and prognosis. Unfortunately the SEER 18 database does not record the score at diagnosis,  
238 so the impact of it is not considered in this analysis. Treatment mode is also associated with  
239 clinical outcome. This study enrolled patients who received gastric resection; however other  
240 information about chemo- or radiotherapy is not available in SEER 18 database. Randomized  
241 clinical trial demonstrates that compared with surgery alone, preoperative administration of  
242 carboplatin and paclitaxel with concurrent radiotherapy significantly improved overall survival  
243 among patients with esophageal or GEJ cancer (HR = 0.657) (33). The NCCN clinical practice  
244 guidelines for GEJ cancer recommend preoperative chemoradiation or perioperative  
245 chemotherapy due to substantial survival benefit compared with surgery alone (34). To overcome  
246 this limitation, a database that provides with fully detailed medical records is needed for analysis.  
247 In addition, consideration of the potential factors aforementioned would greatly improve  
248 prognostic power of survival prediction model. Another limitation is that our results are based on  
249 training set and confirmed by validating set; however the features of the two groups are similar.  
250 So this finding needs to be proved among populations with distinct features.

251 In conclusion, LNR and LODDS staging methods have better prognostic efficacy than traditional  
252 N staging method in CGA patients with regional node metastasis. Besides, the two values are  
253 promising substitute for N staging in nomogram development when other independent prognostic  
254 factors are incorporated.

- 255 **a. Contributorship statement:** WXQ work conception, data interpretation, critical review for  
256 important content, final approval of the manuscript and agreement to be accountable for all  
257 aspects of the work; BM administrative work, funding, critical review for important content,  
258 final approval of the manuscript and agreement to be accountable for all aspects of the work;  
259 ZC acquisition, analysis of data, drafting the work, final approval of the manuscript and  
260 agreement to be accountable for all aspects of the work.
- 261 **b. Competing interests:** None.
- 262 **c. Funding:** This work was supported by [Major Project of Natural Science of Anhui Provincial  
263 Department of Education] grant number [KJ2019ZD73] and [Domestic Visiting Study Project  
264 for Outstanding Young Talents in Colleges and Universities in Anhui Province] grant number

265 [2021].  
 266 **d. Data sharing statement:** Dataset available from the SEER website  
 267 (<https://seer.cancer.gov/data-software/>).  
 268

269 **Acknowledgement:** We thank all patient advisers for their special contribution.  
 270

## 271 References:

- 272 1. Bray F, Ferlay J, Soerjomataram I, Siegel RL, Torre LA, Jemal A. Global cancer statistics 2018:  
 273 GLOBOCAN estimates of incidence and mortality worldwide for 36 cancers in 185 countries. *CA*  
 274 *Cancer J Clin.* [Journal Article]. 2018 2018-11-01;68(6):394-424.  
 275 2. Abdi E, Latifi-Navid S, Zahri S, Yazdanbod A, Pourfarzi F. Risk factors predisposing to cardia  
 276 gastric adenocarcinoma: Insights and new perspectives. *Cancer Med.* [Journal Article; Research  
 277 Support, Non-U.S. Gov't; Review]. 2019 2019-10-01;8(13):6114-26.  
 278 3. Amini N, Spolverato G, Kim Y, Squires MH, Poultsides GA, Fields R, et al. Clinicopathological  
 279 features and prognosis of gastric cardia adenocarcinoma: a multi-institutional US study. *J SURG*  
 280 *ONCOL.* [Comparative Study; Journal Article; Multicenter Study]. 2015 2015-03-01;111(3):285-92.  
 281 4. Sobin L, Gospodarowicz M, Wittekind C. TNM classification of malignant tumours. 7th edition.:  
 282 Wiley-Blackwell; 2009.  
 283 5. Edge S, Byrd D, Compton C, Fritz A, Greene F, Trotti A. AJCC cancer staging manual. 7th  
 284 edition.: Springer; 2009.  
 285 6. Hou Y, Wang X, Chen J. Prognostic significance of metastatic lymph node ratio: the lymph node  
 286 ratio could be a prognostic indicator for patients with gastric cancer. *WORLD J SURG ONCOL.*  
 287 [Journal Article]. 2018 2018-10-04;16(1):198.  
 288 7. Zhu J, Xue Z, Zhang S, Guo X, Zhai L, Shang S, et al. Integrated analysis of the prognostic role  
 289 of the lymph node ratio in node-positive gastric cancer: A meta-analysis. *INT J SURG.* [Journal Article;  
 290 Meta-Analysis; Review]. 2018 2018-09-01;57:76-83.  
 291 8. Sun Z, Xu Y, Li DM, Wang ZN, Zhu GL, Huang BJ, et al. Log odds of positive lymph nodes: a  
 292 novel prognostic indicator superior to the number-based and the ratio-based N category for gastric  
 293 cancer patients with R0 resection. *CANCER-AM CANCER SOC.* [Journal Article; Research Support,  
 294 Non-U.S. Gov't]. 2010 2010-06-01;116(11):2571-80.  
 295 9. Zhao E, Zhou C, Chen S. Prognostic nomogram based on log odds of positive lymph nodes for  
 296 gastric carcinoma patients after surgical resection. *FUTURE ONCOL.* [Journal Article]. 2019  
 297 2019-12-01;15(36):4207-22.  
 298 10. Gu P, Deng J, Sun Z, Wang Z, Wang W, Liang H, et al. Superiority of log odds of positive lymph  
 299 nodes (LODDS) for prognostic prediction after gastric cancer surgery: a multi-institutional analysis of  
 300 7620 patients in China. *SURG TODAY.* [Journal Article]. 2021 2021-01-01;51(1):101-10.  
 301 11. Surveillance, Epidemiology, and End Results (SEER) Program ([www.seer.cancer.gov](http://www.seer.cancer.gov))  
 302 SEER\*Stat Database: Incidence - SEER Research Data, 18 Registries, Nov 2019 Sub (2000-2017) -  
 303 Linked To County Attributes - Time Dependent (1990-2017) Income/Rurality, 1969-2018 Counties,  
 304 National Cancer Institute, DCCPS, Surveillance Research Program, released April 2020, based on the  
 305 November 2019 submission..  
 306 12. Yu Y, Zhang P, Yao R, Wang J, Wang P, Xue X, et al. Prognostic value of log odds of positive  
 307 lymph nodes in node-positive lung squamous cell carcinoma patients after surgery: a SEER



- 1  
2  
3 308 population-based study. *Transl Lung Cancer Res.* [Journal Article]. 2020 2020-08-01;9(4):1285-301.
- 4 309 13. Camp RL, Dolled-Filhart M, Rimm DL. X-tile: a new bio-informatics tool for biomarker  
5 310 assessment and outcome-based cut-point optimization. *CLIN CANCER RES.* [Journal Article;  
6 311 Research Support, Non-U.S. Gov't; Research Support, U.S. Gov't, Non-P.H.S.; Research Support, U.S.  
7 312 Gov't, P.H.S.]. 2004 2004-11-01;10(21):7252-9.
- 8 313 14. Iasonos A, Schrag D, Raj GV, Panageas KS. How to build and interpret a nomogram for cancer  
9 314 prognosis. *J CLIN ONCOL.* [Journal Article; Review]. 2008 2008-03-10;26(8):1364-70.
- 10 315 15. Jian-Hui C, Shi-Rong C, Hui W, Si-le C, Jian-Bo X, Er-Tao Z, et al. Prognostic value of three  
11 316 different lymph node staging systems in the survival of patients with gastric cancer following D2  
12 317 lymphadenectomy. *Tumour Biol.* [Journal Article]. 2016 2016-08-01;37(8):11105-13.
- 13 318 16. Aurello P, Petrucciani N, Nigri GR, La Torre M, Magistri P, Tierno S, et al. Log odds of positive  
14 319 lymph nodes (LODDS): what are their role in the prognostic assessment of gastric adenocarcinoma? *J*  
15 320 *GASTROINTEST SURG.* [Comparative Study; Journal Article]. 2014 2014-07-01;18(7):1254-60.
- 16 321 17. Kilic MO, Gundogdu SB, Ozden S, Saylam B, Tez M. The prognostic value of different node  
17 322 staging systems in patients with  $\leq 15$  lymph nodes following surgery for gastric adenocarcinoma.  
18 323 *ACTA CHIR BELG.* [Journal Article]. 2018 2018-02-01;118(1):1-6.
- 19 324 18. Suh YS, Han DS, Kong SH, Lee HJ, Kim YT, Kim WH, et al. Should adenocarcinoma of the  
20 325 esophagogastric junction be classified as esophageal cancer? A comparative analysis according to the  
21 326 seventh AJCC TNM classification. *ANN SURG.* [Comparative Study; Journal Article; Research  
22 327 Support, Non-U.S. Gov't]. 2012 2012-05-01;255(5):908-15.
- 23 328 19. Huang Q, Shi J, Feng A, Fan X, Zhang L, Mashimo H, et al. Gastric cardiac carcinomas involving  
24 329 the esophagus are more adequately staged as gastric cancers by the 7th edition of the American Joint  
25 330 Commission on Cancer Staging System. *Mod Pathol.* [Journal Article; Research Support, Non-U.S.  
26 331 Gov't; Validation Study]. 2011 2011-01-01;24(1):138-46.
- 27 332 20. Amin M, Edge S, Greene F, Byrd D, Brookland R. *AJCC cancer staging manual.* 8th edition.:  
28 333 Springer; 2016.
- 29 334 21. Liu K, Feng F, Chen XZ, Zhou XY, Zhang JY, Chen XL, et al. Comparison between gastric and  
30 335 esophageal classification system among adenocarcinomas of esophagogastric junction according to  
31 336 AJCC 8th edition: a retrospective observational study from two high-volume institutions in China.  
32 337 *GASTRIC CANCER.* [Comparative Study; Journal Article; Observational Study]. 2019  
33 338 2019-05-01;22(3):506-17.
- 34 339 22. Karstens KF, Ghadban T, Sawez S, Konczalla L, Woestemeier A, Bachmann K, et al. Comparison  
35 340 of the 8th UICC staging system for esophageal and gastric cancers in Siewert type II junctional  
36 341 adenocarcinomas. *Eur J Surg Oncol.* [Comparative Study; Journal Article]. 2020 2020-04-01;46(4 Pt  
37 342 A):638-43.
- 38 343 23. Rizk NP, Ishwaran H, Rice TW, Chen LQ, Schipper PH, Kesler KA, et al. Optimum  
39 344 lymphadenectomy for esophageal cancer. *ANN SURG.* [Journal Article; Research Support, Non-U.S.  
40 345 Gov't]. 2010 2010-01-01;251(1):46-50.
- 41 346 24. Macalindong SS, Kim KH, Nam BH, Ryu KW, Kubo N, Kim JY, et al. Effect of total number of  
42 347 harvested lymph nodes on survival outcomes after curative resection for gastric adenocarcinoma:  
43 348 findings from an eastern high-volume gastric cancer center. *BMC CANCER.* [Journal Article;  
44 349 Research Support, Non-U.S. Gov't]. 2018 2018-01-12;18(1):73.
- 45 350 25. Schoenleber SJ, Schnelldorfer T, Wood CM, Qin R, Sarr MG, Donohue JH. Factors influencing  
46 351 lymph node recovery from the operative specimen after gastrectomy for gastric adenocarcinoma. *J*

- 1  
2  
3 352 GASTROINTEST SURG. [Journal Article]. 2009 2009-07-01;13(7):1233-7.  
4 353 26. Khanjani N, Mirzaei S, Nasrolahi H, Hamed SH, Mosalaei A, Omidvari S, et al. Insufficient  
5 354 lymph node assessment in gastric adenocarcinoma. J Egypt Natl Canc Inst. [Journal Article]. 2019  
6 355 2019-10-22;31(1):2.  
7 356 27. Pei JP, Zhang CD, Fan YC, Dai DQ. Comparison of Different Lymph Node Staging Systems in  
8 357 Patients With Resectable Colorectal Cancer. FRONT ONCOL. [Journal Article]. 2018  
9 358 2018-01-20;8:671.  
10 359 28. Cao J, Yuan P, Ma H, Ye P, Wang Y, Yuan X, et al. Log Odds of Positive Lymph Nodes Predicts  
11 360 Survival in Patients After Resection for Esophageal Cancer. ANN THORAC SURG. [Journal Article;  
12 361 Multicenter Study]. 2016 2016-08-01;102(2):424-32.  
13 362 29. Jin W, Zhu Z, Wu Y, Ding X, Wu H, Song X, et al. Prognostic value of log odds of positive  
14 363 lymph nodes in patients with resectable oral squamous cell carcinoma. ORAL ONCOL. [Journal  
15 364 Article; Research Support, Non-U.S. Gov't]. 2020 2020-09-01;108:104709.  
16 365 30. Li J, Sun Y, Zhao B, Tang C, Fan D, Jiang W, et al. Lymph Node Ratio-Based Staging System for  
17 366 Gallbladder Cancer With Fewer Than Six Lymph Nodes Examined. FRONT ONCOL. [Journal  
18 367 Article]. 2020 2020-01-20;10:542005.  
19 368 31. Spillane AJ, Cheung BL, Winstanley J, Thompson JF. Lymph node ratio provides prognostic  
20 369 information in addition to american joint committee on cancer N stage in patients with melanoma, even  
21 370 if quality of surgery is standardized. ANN SURG. [Journal Article]. 2011 2011-01-01;253(1):109-15.  
22 371 32. Rosa F, Tortorelli AP, Alfieri S, Doglietto GB. Lymph node ratio for gastric cancer: useful  
23 372 instrument or just an expedient to retrieve fewer lymph nodes? ANN SURG. [Letter; Comment]. 2014  
24 373 2014-04-01;259(4):e65.  
25 374 33. van Hagen P, Hulshof MC, van Lanschot JJ, Steyerberg EW, van Berge HM, Wijnhoven BP, et al.  
26 375 Preoperative chemoradiotherapy for esophageal or junctional cancer. N Engl J Med. [Journal Article;  
27 376 Multicenter Study; Randomized Controlled Trial; Research Support, Non-U.S. Gov't]. 2012  
28 377 2012-05-31;366(22):2074-84.  
29 378 34. Ajani JA, D'Amico TA, Bentrem DJ, Chao J, Corvera C, Das P, et al. Esophageal and  
30 379 Esophagogastric Junction Cancers, Version 2.2019, NCCN Clinical Practice Guidelines in Oncology. J  
31 380 Natl Compr Canc Netw. [Journal Article]. 2019 2019-07-01;17(7):855-83.

## 381 382 **Illustrations**

383 Figure 1. Flow diagram of patient selection and grouping.

384 Figure 2. Survival curves of training and validating sets by different staging systems.

385 Figure 3. Construction of nomogram based on Tumor-Lymph node ratio-Metastasis staging system  
386 and calibration plots for the nomogram.

387  
388 Suppl. Figure 1. Plots of Schoenfeld, Martingale, and Deviance residuals for proportional hazard  
389 assumption test in models that incorporate N stage, lymph node ratio and log odds of positive  
390 lymph nodes.

391 Suppl. Figure 2. Construction of nomogram based on Tumor-Log odds of positive lymph nodes  
392 -Metastasis staging system and calibration plots for the nomogram.

393 Suppl. Figure 3. Receiver operator characteristic (ROC) curves and decision curve analysis (DCA)  
394 plots for comparison of the prediction powers of the different models.

1  
2  
3  
4  
5  
6  
7  
8  
9  
10  
11  
12  
13  
14  
15  
16  
17  
18  
19  
20  
21  
22  
23  
24  
25  
26  
27  
28  
29  
30  
31  
32  
33  
34  
35  
36  
37  
38  
39  
40  
41  
42  
43  
44  
45  
46

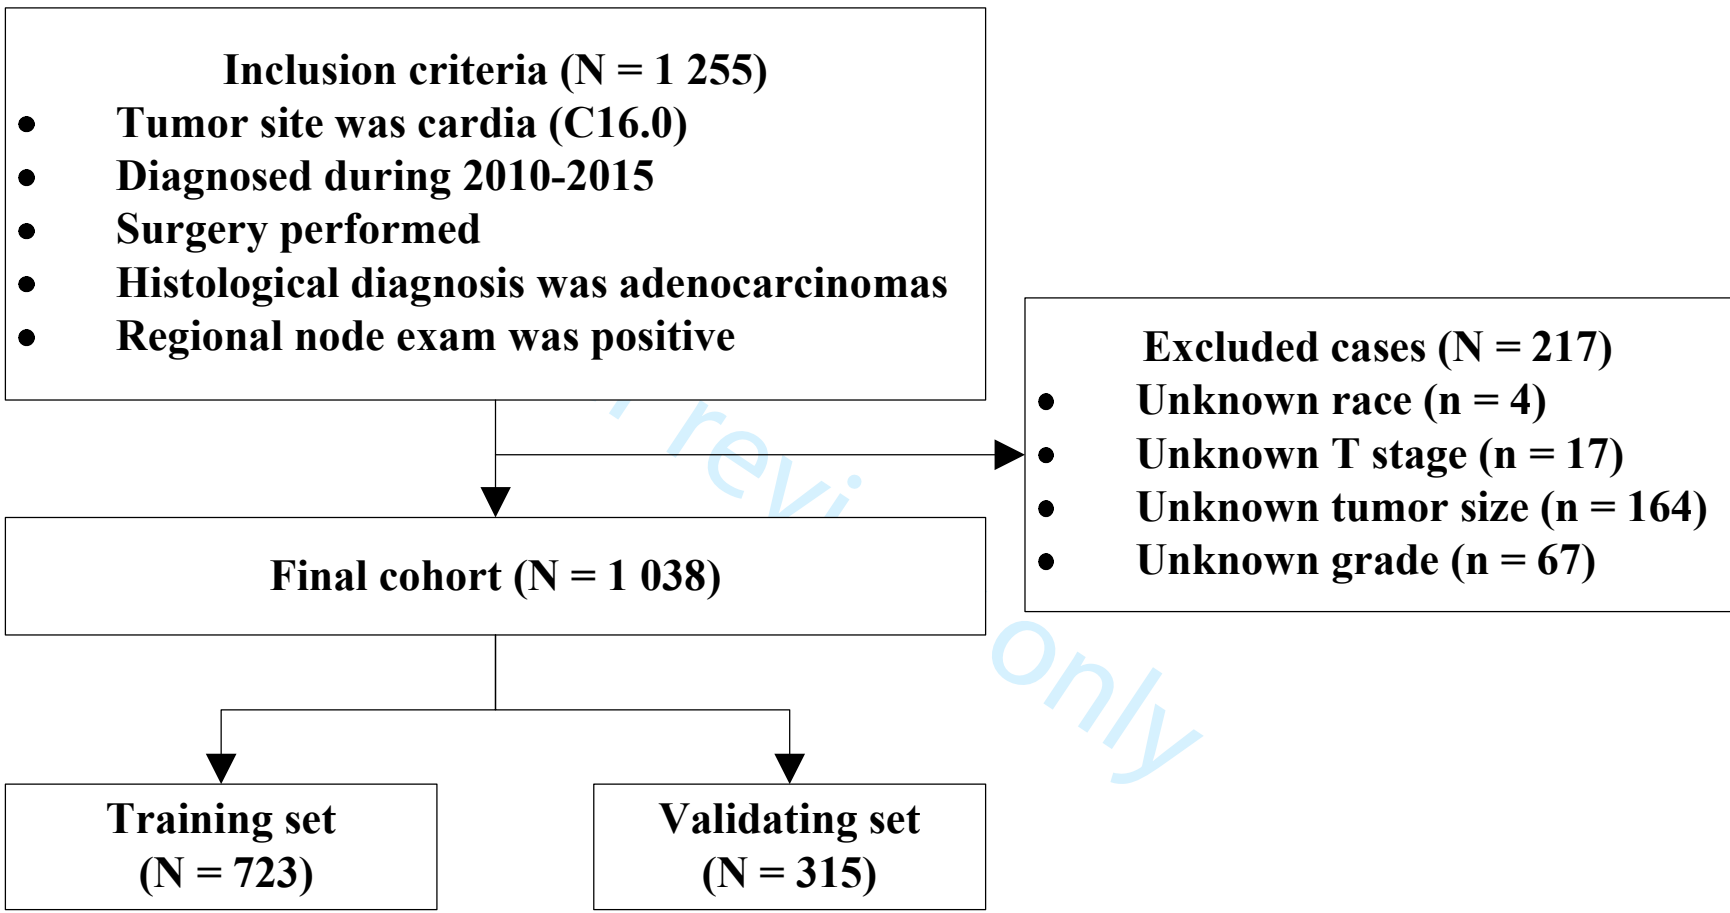

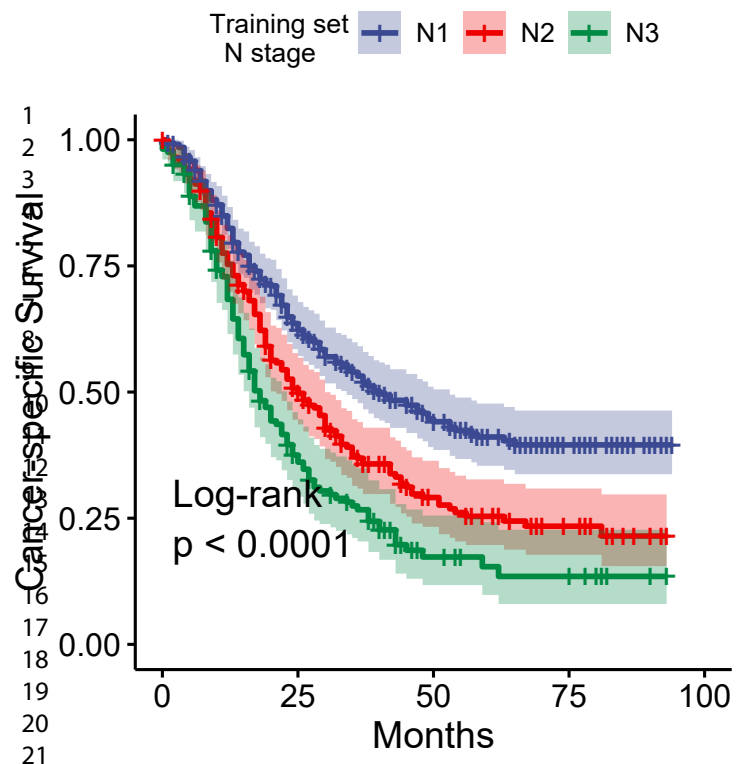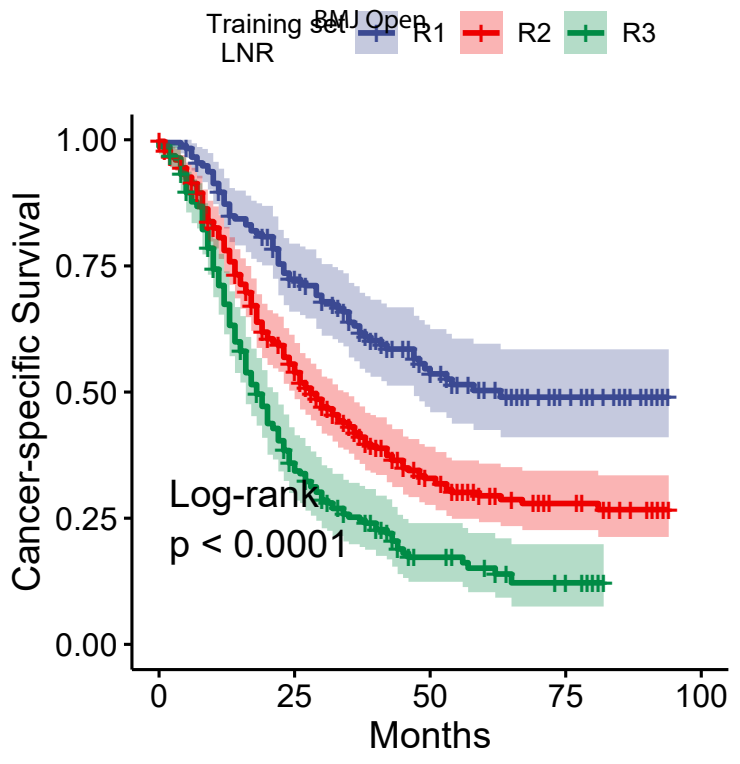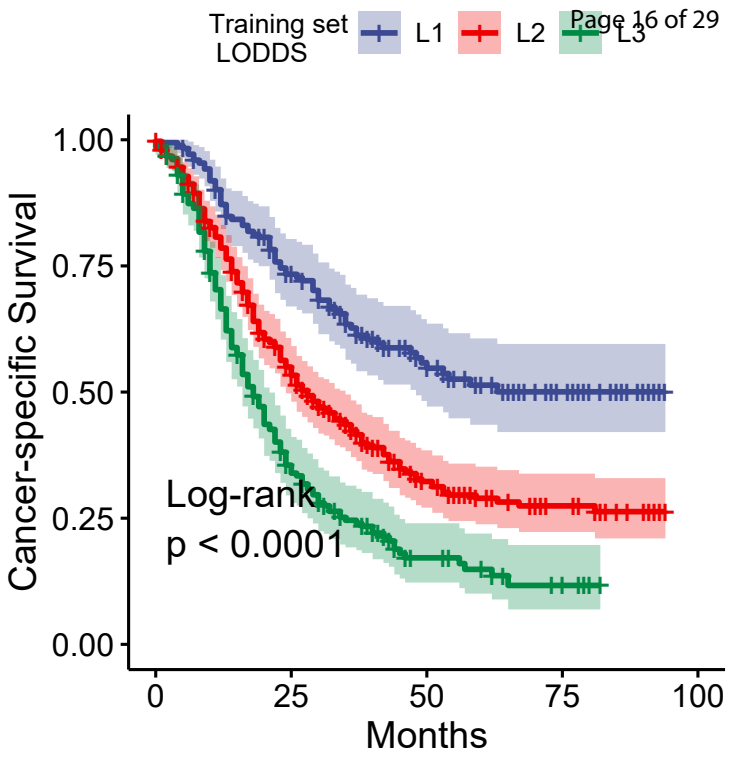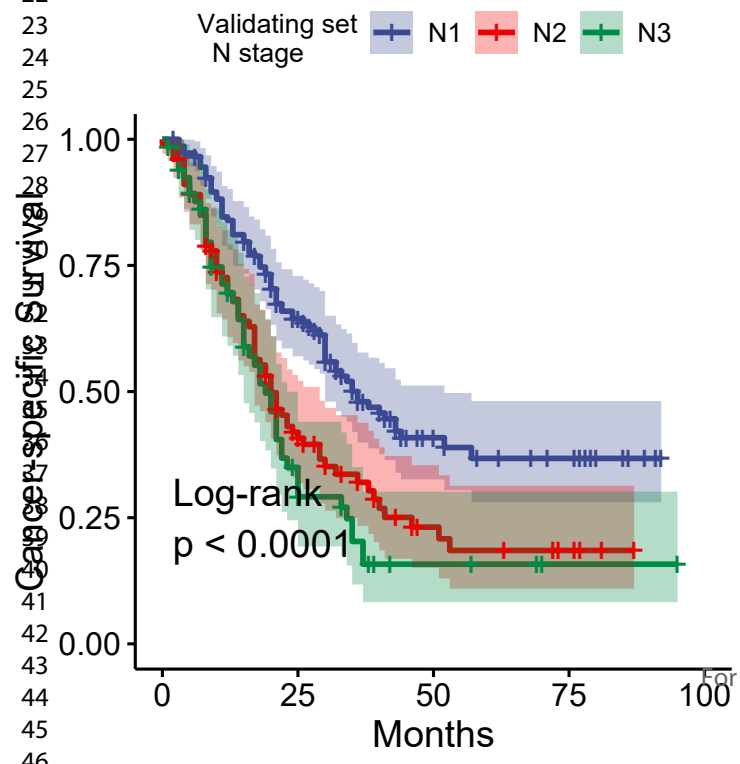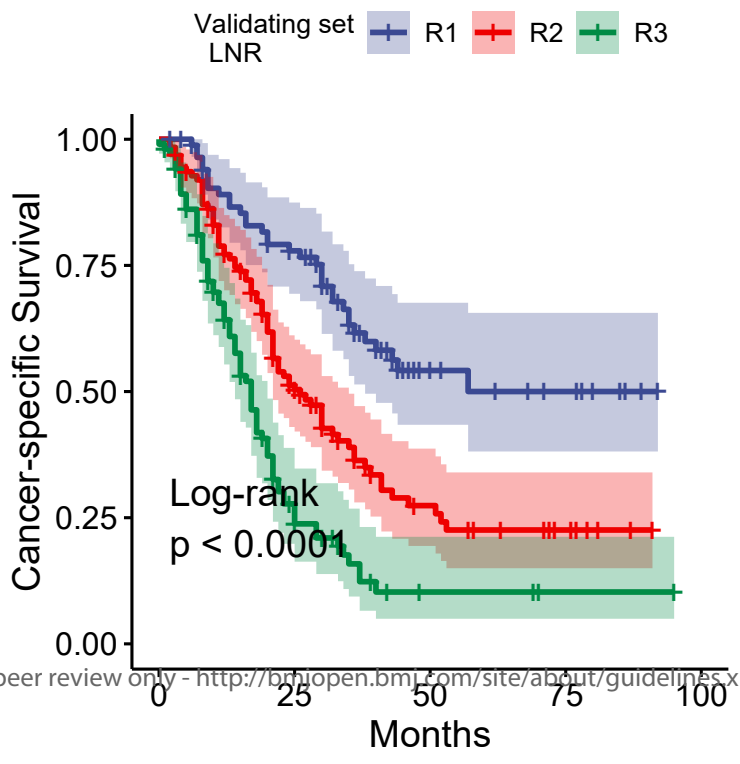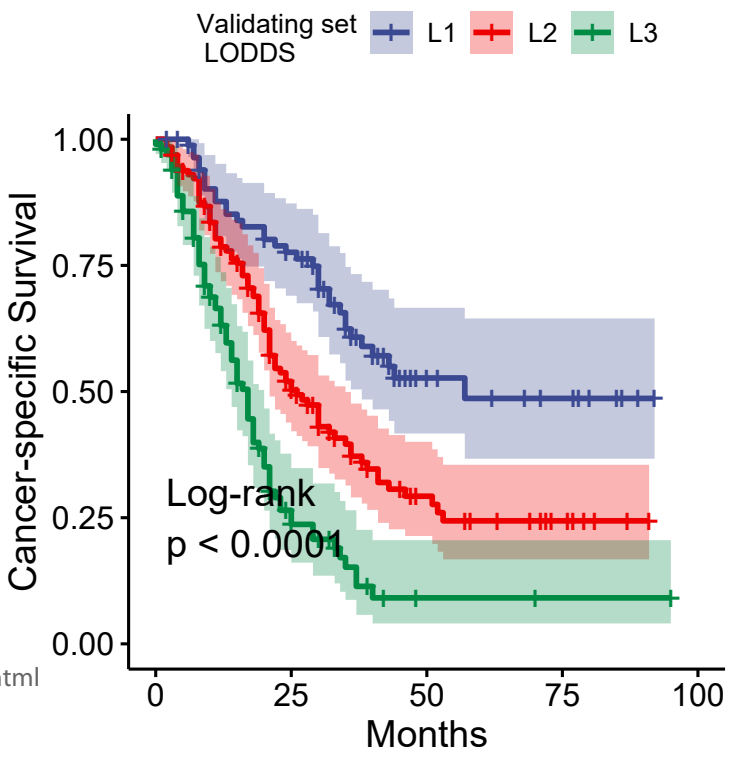

Points

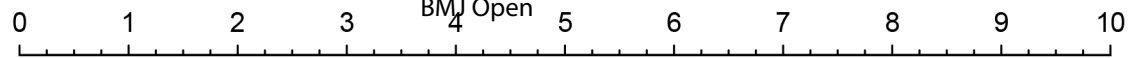

Race

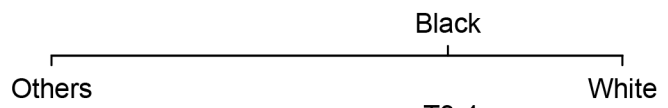

T.stage

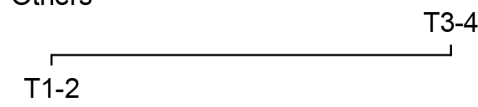

LNR

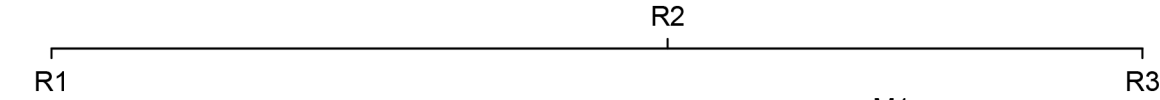

M.stage

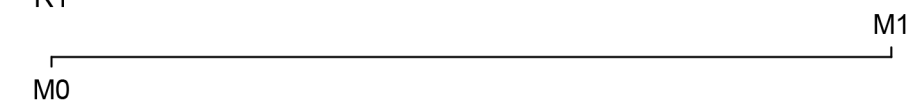

Total Points

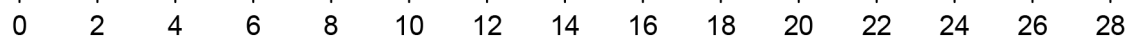

1-year CSS

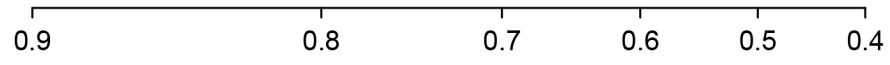

2-year CSS

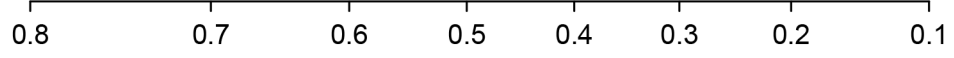

5-year CSS

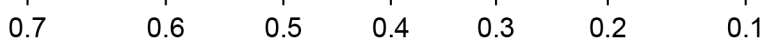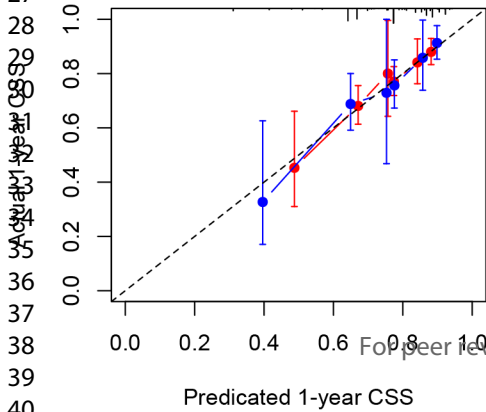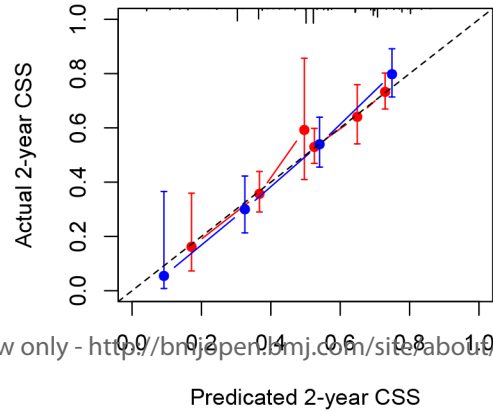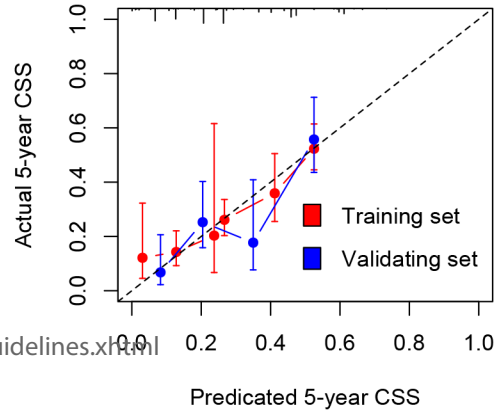

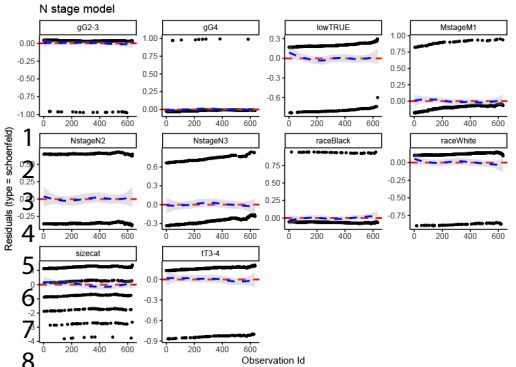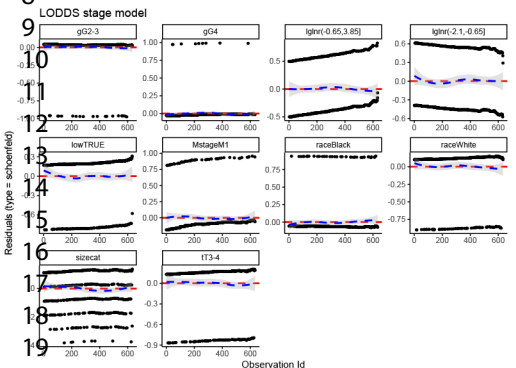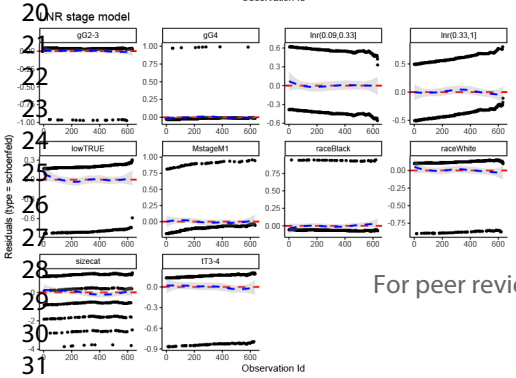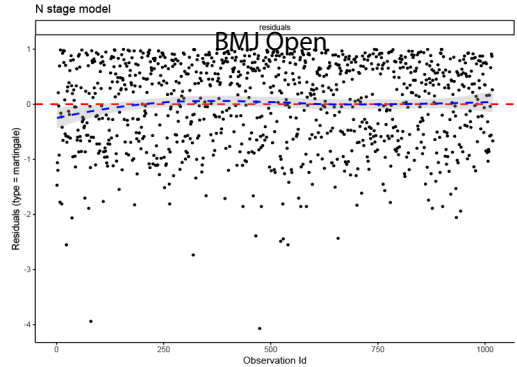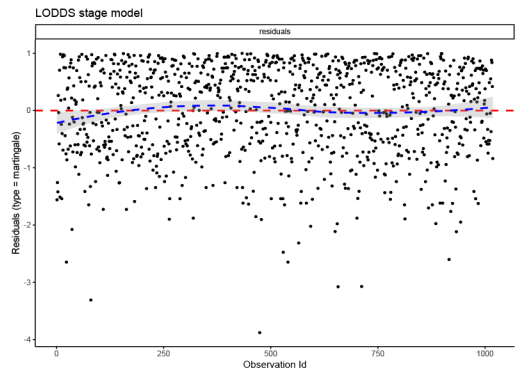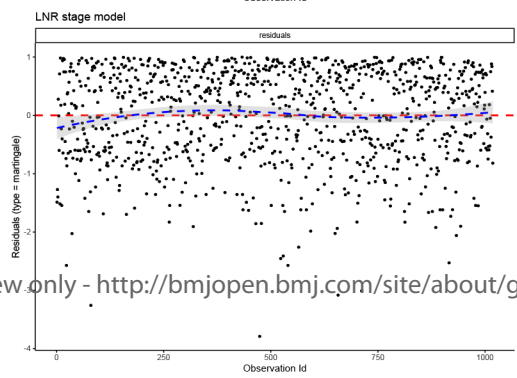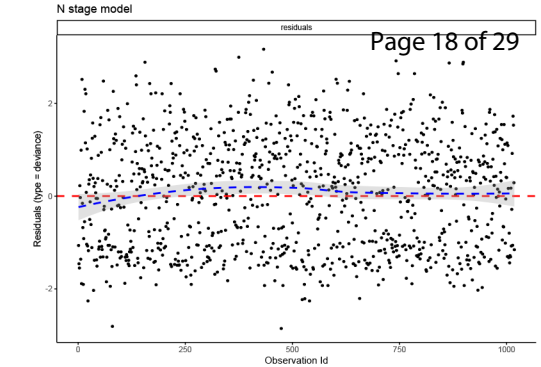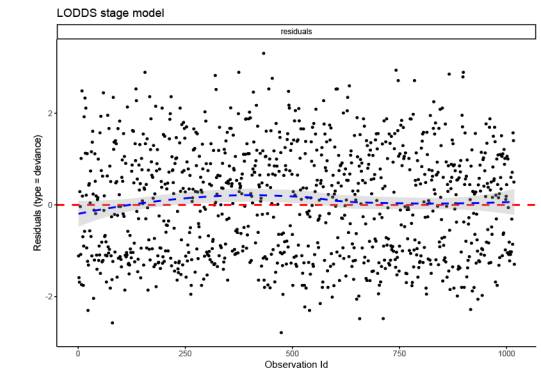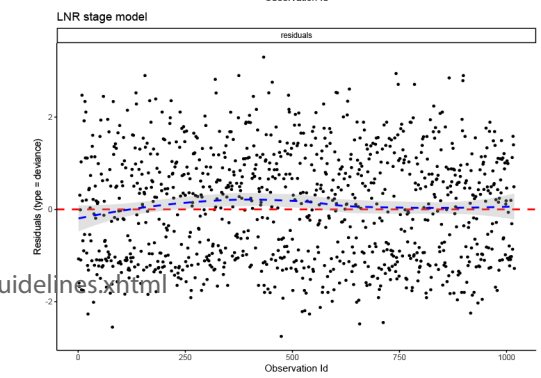

Points

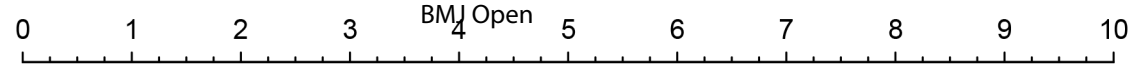

Race

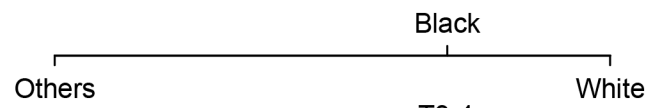

T.stage

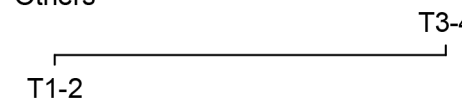

LODDS

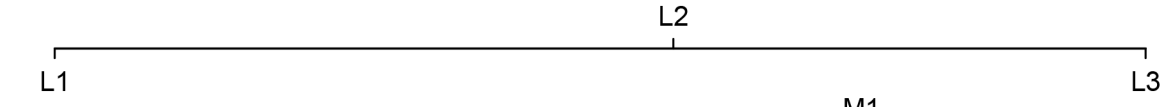

M.stage

M0

Total Points

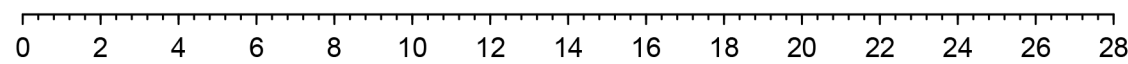

1-year CSS

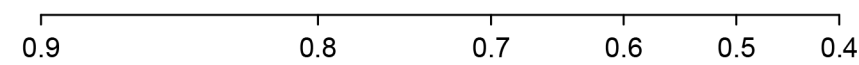

2-year CSS

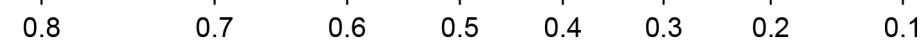

5-year CSS

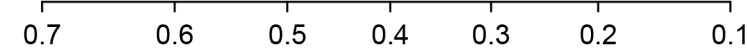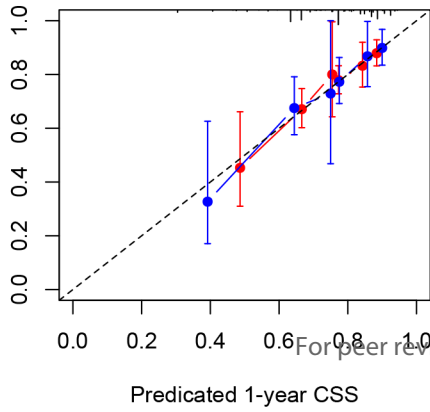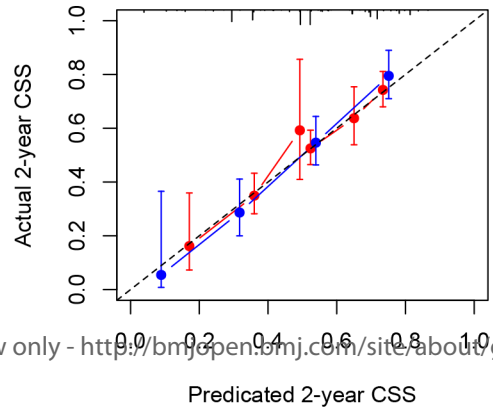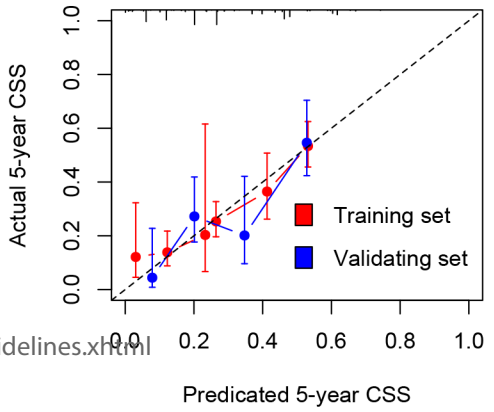

1  
2  
3  
4  
5  
6  
7  
8  
9  
10  
11  
12  
13  
14  
15  
16  
17  
18  
19  
20  
21  
22  
23  
24  
25  
26  
27  
28  
29  
30  
31  
32  
33  
34  
35  
36  
37  
38  
39  
40  
41

Training set

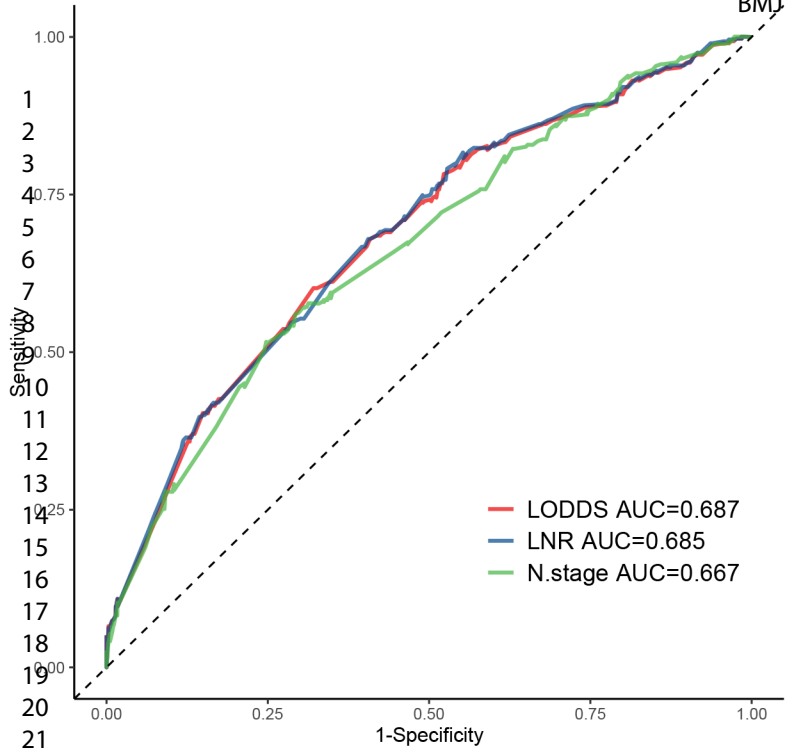

Validating set

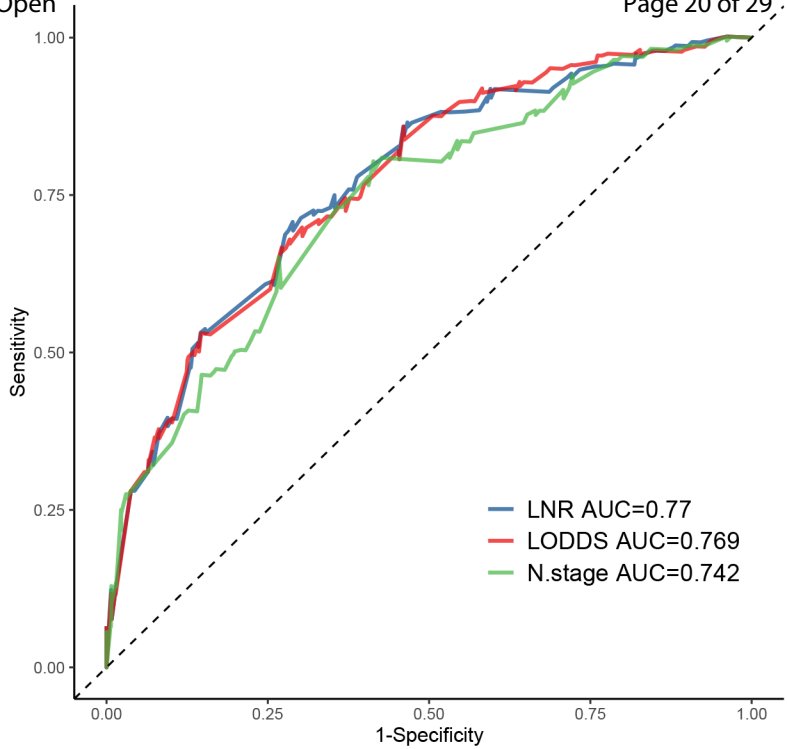

Training set

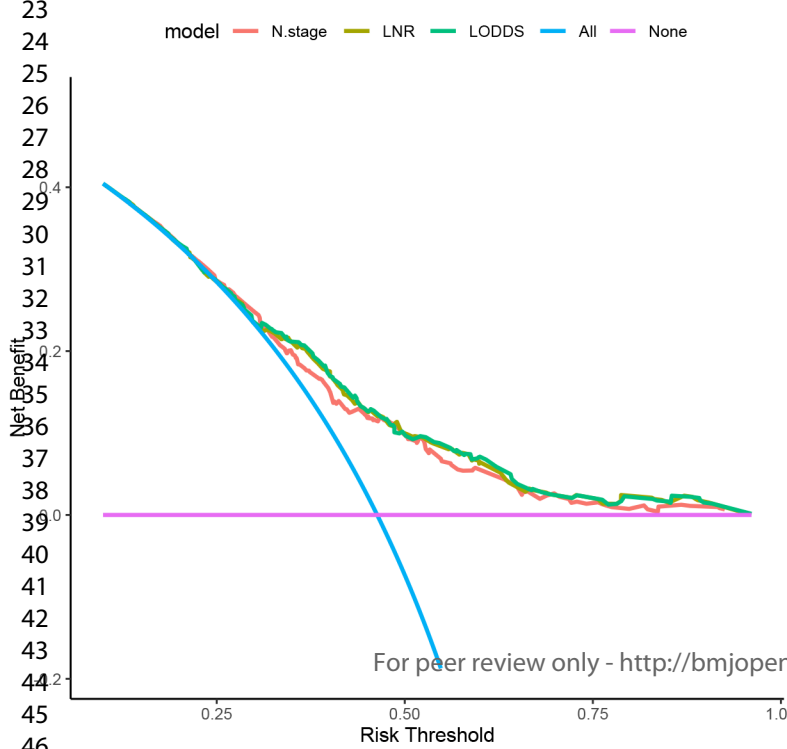

Validating set

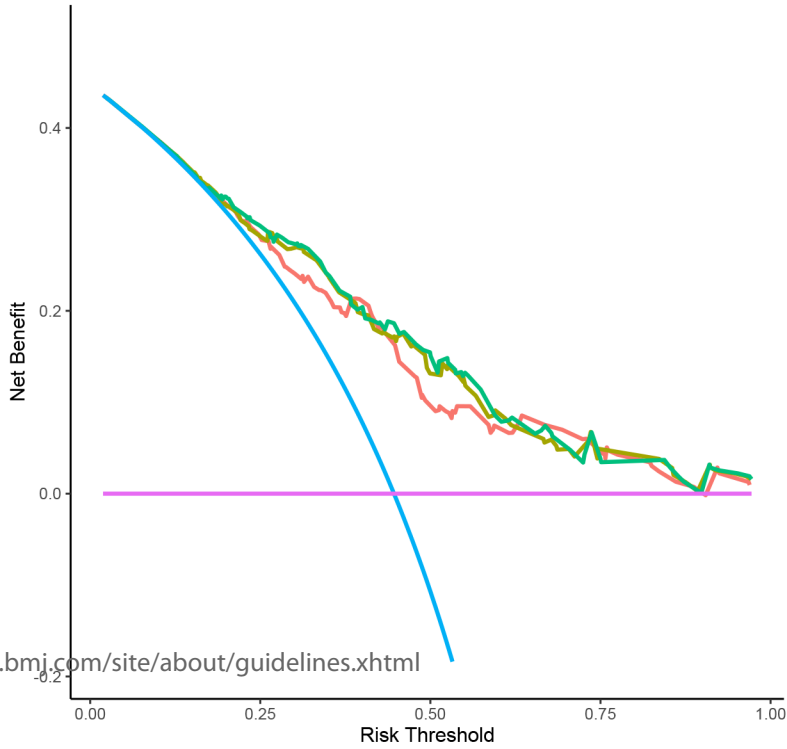



Supplementary Table 1. Comparison of the discrimination ability of different models based on different cutoff values.

|             | Crude model       |         |      | Adjusted model    |         |
|-------------|-------------------|---------|------|-------------------|---------|
|             | HR (95% CI)       | C-index | AIC  | HR (95% CI)       | C-index |
| LNR         |                   |         |      |                   |         |
| Cutoff_1    |                   | 0.607   | 5376 | 0.643             | 5350    |
| <0.09       | 1 (ref)           |         |      | 1 (ref)           |         |
| 0.09~0.33   | 1.88 (1.44, 2.44) |         |      | 1.74 (1.33, 2.29) |         |
| >0.33       | 3.02 (2.30, 3.97) |         |      | 2.63 (1.97, 3.50) |         |
| Cutoff_2    |                   | 0.605   | 5378 | 0.641             | 5355    |
| <0.09       | 1 (ref)           |         |      | 1 (ref)           |         |
| 0.09~0.40   | 1.97 (1.52, 2.54) |         |      | 1.85 (1.38, 2.54) |         |
| >0.40       | 3.16 (2.38, 4.21) |         |      | 2.72 (2.02, 3.67) |         |
| LODDS       |                   |         |      |                   |         |
| Cutoff_1    |                   | 0.609   | 5373 | 0.644             | 5346    |
| <-2.09      | 1 (ref)           |         |      | 1 (ref)           |         |
| -2.09~-0.65 | 1.93 (1.48, 2.51) |         |      | 1.80 (1.36, 2.37) |         |
| >-0.65      | 3.13 (2.38, 4.13) |         |      | 2.77 (2.07, 3.70) |         |
| Cutoff_2    |                   | 0.605   | 5378 | 0.640             | 5352    |
| <-2.10      | 1 (ref)           |         |      | 1 (ref)           |         |
| -2.09~-0.37 | 2.00 (1.54, 2.59) |         |      | 1.86 (1.42, 2.44) |         |
| >-0.37      | 3.26 (2.45, 4.33) |         |      | 2.83 (2.10, 3.81) |         |

Cutoff\_1 was generated by minimal p-value method via X-tile software, cutoff\_2 was generated using P25 and P75.

Supplementary Table 2. Univariate analysis of the potential confounders.

| Variables                     | HR (95% CI)        | P-value |
|-------------------------------|--------------------|---------|
| Age (increased by 10ys)       | 1.06 (0.98 – 1.14) | 0.065   |
| Tumor size (increased by 1cm) | 1.13 (1.06 – 1.19) | <0.001  |
| Sex                           |                    |         |
| Male                          | 1                  |         |
| Female                        | 1.09 (0.89 – 1.34) | 0.386   |
| Race                          |                    |         |
| Others                        | 1                  |         |
| Black                         | 1.42 (0.91 – 2.21) | 0.118   |
| White                         | 1.57 (1.13 – 2.19) | 0.007   |
| Grade                         |                    |         |
| G1                            | 1                  |         |
| G2-3                          | 2.08 (1.20 – 3.60) | 0.009   |
| G4                            | 3.08 (1.32 – 7.22) | 0.009   |
| T                             |                    |         |
| T1-2                          | 1                  |         |
| T3-4                          | 1.70 (1.38 – 2.10) | <0.001  |
| N                             |                    |         |
| N1                            | 1                  |         |
| N2                            | 1.61 (1.34 – 1.93) | <0.001  |
| N3                            | 2.15 (1.77 – 2.62) | <0.001  |
| M                             |                    |         |
| M0                            | 1                  |         |
| M1                            | 2.61 (2.00 – 3.39) | <0.001  |
| Low nodes yield               |                    |         |
| No                            | 1                  |         |
| Yes                           | 1.64 (1.35 – 1.99) | <0.001  |

1  
2  
3 Editor's Comments to Author (if any):  
4  
5

6 - Please revise your title so that it includes your study design. This is the preferred format for the  
7 journal.

8 **Response:** The study design is included in the title. It is a register-based retrospective cohort  
9 study.

10 - Please revise the abstract >> design section. A "database review" is not an appropriate  
11 description of your study.

12 **Response:** This section has been revised as "a register-based retrospective cohort study".

13 - Please revise the Patient and Public Involvement statement. This section should be included as a  
14 sub-heading in the methods section of all manuscripts. It should provide a brief description of any  
15 patient involvement in study design or conduct of the study, as well as any plans to disseminate  
16 the results to study participants. If patients and or public were not involved please state this.

17 The Patient and Public Involvement statement should NOT contain details of participant  
18 recruitment, patient consent or ethics approval. This information should be included elsewhere in  
19 your methods section. Please see our blog for further information regarding PPI:  
20 [http://blogs.bmj.com/bmjopen/2018/03/23/new-requirements-for-patient-and-public-involvement-](http://blogs.bmj.com/bmjopen/2018/03/23/new-requirements-for-patient-and-public-involvement-statements-in-bmj-open/)  
21 [statements-in-bmj-open/](http://blogs.bmj.com/bmjopen/2018/03/23/new-requirements-for-patient-and-public-involvement-statements-in-bmj-open/)

22 **Response:** The PPI statement has been revised according to the information from blog.

23 *"The development of the research question and outcome measures were not informed by patients'*  
24 *priorities, experience, and preferences. The patients were involved during the retrospective review of*  
25 *public database where cases were diagnosed during 2010-2015. Patients were not involved in the*  
26 *recruitment to and conduct of the study. The findings of the study will be disseminated by online article*  
27 *to all study participants whose identity kept confidential during the whole research."*

28 - Please work on improving the reporting of the methods. For example, what was the study's  
29 design? What are the settings? More information is needed on the data source used. Was it an  
30 anonymised dataset? What permissions were obtained? Did this study require approval from your  
31 ethics committee? If not then please explain why not.

32 **Response:** The reporting of the methods has been revised at the beginning of the Methods section.

33 *"This study is a SEER register-based retrospective cohort study, which aimed to enroll patients with*  
34 *node positive cardia gastric adenocarcinoma (CGA), review crucial clinical characteristics and*  
35 *observe survival of this population. The source of SEER data is registered cancer cases from various*  
36 *locations throughout the United States. The permission of data access was obtained by sending*  
37 *application form and receiving confirmation mail with valid username (21268-Nov2019) and password.*  
38 *This study was granted exemption from requiring informed consent. All procedures performed in*  
39 *studies involving human participants were in accordance with the ethical standards of the Ethics*  
40 *Committee of the Anhui Medical College."*

41 - Along with your revised manuscript, please provide a completed copy of the STROBE checklist  
42 (<http://www.strobe-statement.org/>).

43 **Response:** We provide a STROBE checklist and each item is linked to the line number of the  
44 revised manuscript.  
45  
46  
47  
48  
49  
50  
51  
52  
53  
54  
55  
56  
57  
58  
59  
60

1  
2  
3 ##Reviewer: 1

4 Dr. Rui Zhong, Southwest Medical University  
5  
6

7 Comments to the Author:

8 1.The continuous factors evaluated, LNR, age, tumour size, LODDS were all categorized and then  
9 included in the model. Categorization results in substantial loss of statistical power and reduced  
10 interpretability. For instance, by selecting the cutoff of age at 65, the interpretation is that a 64  
11 year old is the same as a 30 year old, but the 64 year old is different than a 65 year old. This makes  
12 no biological sense. Further, although the authors state that the 'best optimal cutoff' was selected  
13 (which is a form of data dredging), it is questioned that the best optimal cutoff would result in  
14 cutoffs as they did (i.e. age=65, tumour size=25, etc). The best option would be to leave the  
15 continuous variables as continuous for modeling purposes.  
16

17  
18 **Response:** Thank you for your suggestion. According to the coding rule of SEER database, age  
19 and tumor size are not always in numeric format (e.g. year of 85+, or tumor size of >990 mm),  
20 nevertheless you kindly remind us that stratification by cutoff values will result in substantial loss  
21 of statistical power. Therefore the revised manuscript transforms age and tumor size into  
22 categorized variables that contain much more strata. Age is transformed as a variable of 9 levels,  
23 with the lowest of 0-10 and the highest of 80+ (interval of 10 years). However univariate analysis  
24 shows that age is not associated with survival (see Suppl. Table 1.), so it is not included in the  
25 final model. Likewise tumor size is transformed as a variable of 6 levels, with the lowest of less  
26 than 1cm and the highest of over 5cm (interval of 1cm).  
27

28 LNR and LODDS are still kept as trichotomous factors because they are used as alternative  
29 indicators for AJCC N stage.  
30  
31

32  
33  
34 2.What selection process was used to select factors for inclusion in the multivariable model?  
35 Please explain whether a single factor regression analysis was performed before the variables  
36 entered the multivariate COX regression. In addition, please explain how this process addresses  
37 the potential effects of confounding or collinearity.  
38

39 **Response:** In previous manuscript, we selected factors due to clinical significance (for example,  
40 higher stage or large tumor size indicates unfavorable outcome). Inspired by your question, we  
41 consider both univariate model results and clinical significance in the revised manuscript, and  
42 finally include tumor size, race, grade, T stage, M stage and low nodes yield as adjusted variables  
43 for stepwise Cox regression model. The results of univariate analyses are listed in the  
44 supplementary table 1. So the confounding effect is addressed by multivariable analysis that  
45 incorporates with potential confounders.  
46  
47  
48

49  
50 3.Please consider augmenting the discussion of the findings concerning LNR. LNR association  
51 with survival is an exciting aspect of cardia gastric cancer that is currently emerging and may be  
52 clinically meaningful.  
53

54 **Response:** Thank you for your suggestion. In the previous paper, we focused on the advantage of  
55 LNR when LN harvest is inadequate. In the revised paper, we further discuss the clinical meaning  
56 of LNR. We are very grateful for the comment that helps us improve this study.  
57  
58

59 4.Why did the author use the x-titile software for the cutoff value to choose the third quartile  
60

1  
2  
3 instead of the binary or interquartile range?

4 **Response:** We transformed LNR and LODDS into trichotomous variables and selected two cut-off  
5 points that represented the greatest group difference of CSS probability according to the minimum  
6 p-value method. Thus LNR was re-coded as R1, R2 and R3; LODDS was re-coded as L1, L2 and  
7 L3, which was similar with the trichotomous AJCC N staging (N1, N2 and N3). Since only  
8 node-positive patients were enrolled, no N0 patients existed here. We address this issue in the  
9 revised manuscript in order to make it clear and understandable for readers. Thank you for your  
10 question.  
11  
12  
13

14  
15 5.As the author said whether LNR or LODDS based staging system outperforms TNM 8th edition  
16 needs to be further investigated. We want to know whether all the stagings can be corrected to the  
17 eighth edition based on the existing fields of the seer databases.  
18

19 **Response:** Inspired by your suggestion, all the stagings are now corrected to the 8<sup>th</sup> edition.  
20 Accordingly, the results have been modified. Thank you.  
21  
22

23 6.Given the importance of the Cox PH model for the development of the nomogram, it would  
24 appropriate to include validation that the assumptions of a Cox PH model are met. Please include  
25 plots (in the main text or a supplemental figure) of the Schoenfeld, Martingale, and Deviance  
26 residuals.  
27

28 **Response:** The plots for PH model validation are included in the supplementary figure 1. Plots of  
29 Schoenfeld, Martingale, and Deviance residuals for models that incorporate N stage, LNR and  
30 LODDS are all presented. The tests show that PH assumption is met in all models ( $P>0.05$ ). Thank  
31 you for the advice.  
32  
33

34 7.ECOG/Karnofsky performance scores not utilized. Please comment on why these were not  
35 utilized as they serve as significant reference points for PC treatment. If possible, this would be a  
36 great thing to include in this analysis or the analyses suggested above.  
37

38 **Response:** Unfortunately, variables that reflect general status are not available in SEER database,  
39 so ECOG or KPS was not utilized. We address this issue as a limitation in the Discussion Section  
40 of the revised paper. Thank you for the comment.  
41

42 *"...One limitation of this study is that some important factors that are associated with survival are*  
43 *not considered in the model due to unavailable data source. For example, ECOG/KPS score is*  
44 *commonly taken into account in survival analysis due to its remarkable relationship with general*  
45 *status and prognosis. Unfortunately the SEER 18 database does not record the score at diagnosis,*  
46 *so the impact of it is not considered in this analysis.....To overcome this limitation, a database*  
47 *that provides with fully detailed medical records is needed for analysis."*  
48  
49  
50

51 8.altered cutoff values would be an essential factor to analyze during the further optimization of  
52 this model. This needs to be further explained in the discussion.  
53

54 **Response:** Thank you for your suggestion. In order to cut LNR and LODDS into trichotomous  
55 factor, the previous study selected two points by using the minimal p-value method via X-tile  
56 software. Unlike one cutoff point selection, ROC and maximally selected rank statistics cannot be  
57 applied in two-point selection. Therefore the revised manuscript attempts to generate trichotomous  
58 factors using P25/P75, construct regression model and compare discrimination ability with X-tile  
59  
60

1  
2  
3 based cutoff values. As a result, the X-tile based values have higher power and are finally included  
4 in further analysis. We address this issue in the revised paper and present the process in Suppl.  
5 Table 2. Although the previous results remain, this step is very crucial for optimizing the models  
6 and improving the study reliability. We deeply appreciate this comment.  
7

8 *"...For model optimization, LNR and LODDS were also categorized into trichotomous factors*  
9 *using cut-off values of P25 and P75. The discrimination ability of the model based on interquartile*  
10 *was lower (Suppl. Table 2), so this model was not further analyzed...."*  
11  
12

13  
14 9. Please explain why the N stages do not appear in this nomogram. For example, they do not show  
15 significance in the multivariate COX regression?

16 **Response:** In the present study, we attempt to construct a new alternative indicator for N stage,  
17 because the current N stage classification may not perform well in cardia gastric cancer, so we  
18 presented the nomograms that cooperated with LNR or LODDS, other than N staging. In other  
19 words, N stages DO appear in the nomogram, but in the form of LNR or LODDS. In addition, the  
20 other reviewer suggested us to pick one plot to avoid confusion and unclear message; we only  
21 show one nomogram that cooperates with LNR in the main text, and show the other plot in the  
22 supplementary file. We hope the revision is acceptable.  
23  
24  
25

26  
27 10. We believe that the nomogram established by the author should be compared with traditional  
28 models, such as ROC curve and Decision Curve Analysis.

29 **Response:** In the revised paper, ROC and DCA curve are made to compare the prognostic powers  
30 between the new nomogram models based on LNR and LODDS and the traditional model based  
31 on N stage. The results indicate that the new nomogram models are better. For details, please see  
32 the supplementary figure 3. We really thank you for the suggestion that further confirms our  
33 results.  
34  
35  
36  
37  
38  
39  
40  
41  
42  
43  
44  
45  
46  
47  
48  
49  
50  
51  
52  
53  
54  
55  
56  
57  
58  
59  
60

1  
2  
3 ##Reviewer: 2

4 Dr. Rasa Zarnegar , Weill Cornell Medical College

6  
7 Comments to the Author:

8 I think this is a nice paper with 2 nomograms for the determination for CGA.

9  
10  
11 I think there are some revisions that would make this paper better. The SEER DB has access to  
12 total number of nodes analyzed and the number of positive nodes. It is important to use the current  
13 guidelines 8th Edition for this analysis even though the data was from prior to implementation of  
14 the 8th. The concept should still hold and validate the rigor of the study based on current  
15 guidelines.  
16

17 **Response:** All the 7<sup>th</sup> stagings are now corrected to the 8th edition. Thank you for your brilliant  
18 suggestion.  
19

20  
21 2. Raw data on the patient population No of nodes harvested and total positive is required to  
22 determine the frequency of low yield in the study design.

23 **Response:** In the revised paper, we describe the number of nodes harvested and total positive, and  
24 the frequency of low nodes yield (please see Table 1). The frequency of low yield is also in the  
25 multivariable model because it is associated with survival in univariate analysis (Suppl. Table 2).  
26  
27

28  
29 3. There should be discussion and data on neoadjuvant therapy as this likely impact survival and  
30 the number of patient that received therapy.

31 **Response:** Neoadjuvant therapy is likely to influence survival; unfortunately the database,  
32 Incidence - SEER Research Data, 18 Registries, Nov 2019 Sub 2000-2017 (SEER 18 database),  
33 does not provides with information about chemotherapy, therefore it is unavailable for this study.  
34 We treat it as a limitation and discuss the impact of neoadjuvant therapy in the Discussion Section.  
35 *"...Treatment mode is also associated with clinical outcome. This study enrolled patients who  
36 received gastric resection; however other information about chemo- or radiotherapy is not  
37 available in SEER 18 database. Randomized clinical trial demonstrates that compared with  
38 surgery alone, preoperative administration of carboplatin and paclitaxel with concurrent  
39 radiotherapy significantly improved overall survival among patients with esophageal or GEJ  
40 cancer (HR = 0.657) (31). The NCCN clinical practice guidelines for GEJ cancer recommend  
41 preoperative chemoradiation or perioperative chemotherapy due to substantial survival benefit  
42 compared with surgery alone (32). To overcome this limitation, a database that provides with fully  
43 detailed medical records is needed for analysis...."*  
44  
45  
46  
47  
48  
49

50 4. I suggest picking one nomogram. I think its important to send a clear message and by  
51 presenting 2 nomograms the authors are creating confusion and an unclear message. I think by  
52 being more focused on one approach would allow for improved implementation. The authors may  
53 want to compare whichever they select with conventional lymphadenectomy is so desired.

54 **Response:** Thanks for the advice. We pick the nomogram that incorporates with LNR because the  
55 calculation of LNR is easier than LODDS, which is more convenient in clinical practice. The  
56 nomogram and calibration curves based on LODDS are shown in supplementary figure 2. In  
57 addition, for more clear presentation, we put the calibration curves of training (red) and validating  
58  
59  
60

1  
2  
3 set (blue) into one plot.  
4  
5  
6  
7  
8  
9  
10  
11  
12  
13  
14  
15  
16  
17  
18  
19  
20  
21  
22  
23  
24  
25  
26  
27  
28  
29  
30  
31  
32  
33  
34  
35  
36  
37  
38  
39  
40  
41  
42  
43  
44  
45  
46  
47  
48  
49  
50  
51  
52  
53  
54  
55  
56  
57  
58  
59  
60

For peer review only



STROBE Statement—checklist of items that should be included in reports of observational studies

**All line numbers are based on the manuscript with tracked change.**

|                              | Item No | Recommendation                                                                                                                                                                                                                                                                                                                                                                                                                                                                                                                                                                                                                                                                                                                                         |
|------------------------------|---------|--------------------------------------------------------------------------------------------------------------------------------------------------------------------------------------------------------------------------------------------------------------------------------------------------------------------------------------------------------------------------------------------------------------------------------------------------------------------------------------------------------------------------------------------------------------------------------------------------------------------------------------------------------------------------------------------------------------------------------------------------------|
| <b>Title and abstract</b>    | 1       | (a) Indicate the study's design with a commonly used term in the title or the abstract <b>title page</b><br>(b) Provide in the abstract an informative and balanced summary of what was done and what was found <b>page2</b>                                                                                                                                                                                                                                                                                                                                                                                                                                                                                                                           |
| <b>Introduction</b>          |         |                                                                                                                                                                                                                                                                                                                                                                                                                                                                                                                                                                                                                                                                                                                                                        |
| Background/rationale         | 2       | Explain the scientific background and rationale for the investigation being reported <b>page 4</b>                                                                                                                                                                                                                                                                                                                                                                                                                                                                                                                                                                                                                                                     |
| Objectives                   | 3       | State specific objectives, including any prespecified hypotheses <b>page 4</b>                                                                                                                                                                                                                                                                                                                                                                                                                                                                                                                                                                                                                                                                         |
| <b>Methods</b>               |         |                                                                                                                                                                                                                                                                                                                                                                                                                                                                                                                                                                                                                                                                                                                                                        |
| Study design                 | 4       | Present key elements of study design early in the paper <b>page 4</b>                                                                                                                                                                                                                                                                                                                                                                                                                                                                                                                                                                                                                                                                                  |
| Setting                      | 5       | Describe the setting, locations, and relevant dates, including periods of recruitment, exposure, follow-up, and data collection <b>page 4-5</b>                                                                                                                                                                                                                                                                                                                                                                                                                                                                                                                                                                                                        |
| Participants                 | 6       | (a) <i>Cohort study</i> —Give the eligibility criteria, and the sources and methods of selection of participants. Describe methods of follow-up <b>page 4</b><br><i>Case-control study</i> —Give the eligibility criteria, and the sources and methods of case ascertainment and control selection. Give the rationale for the choice of cases and controls <b>NA</b><br><i>Cross-sectional study</i> —Give the eligibility criteria, and the sources and methods of selection of participants <b>NA</b><br>(b) <i>Cohort study</i> —For matched studies, give matching criteria and number of exposed and unexposed <b>NA</b><br><i>Case-control study</i> —For matched studies, give matching criteria and the number of controls per case <b>NA</b> |
| Variables                    | 7       | Clearly define all outcomes, exposures, predictors, potential confounders, and effect modifiers. Give diagnostic criteria, if applicable <b>page 5</b>                                                                                                                                                                                                                                                                                                                                                                                                                                                                                                                                                                                                 |
| Data sources/<br>measurement | 8*      | For each variable of interest, give sources of data and details of methods of assessment (measurement). Describe comparability of assessment methods if there is more than one group <b>page 5</b>                                                                                                                                                                                                                                                                                                                                                                                                                                                                                                                                                     |
| Bias                         | 9       | Describe any efforts to address potential sources of bias <b>page 5</b>                                                                                                                                                                                                                                                                                                                                                                                                                                                                                                                                                                                                                                                                                |
| Study size                   | 10      | Explain how the study size was arrived at <b>NA</b>                                                                                                                                                                                                                                                                                                                                                                                                                                                                                                                                                                                                                                                                                                    |
| Quantitative variables       | 11      | Explain how quantitative variables were handled in the analyses. If applicable, describe which groupings were chosen and why <b>page 5-6</b>                                                                                                                                                                                                                                                                                                                                                                                                                                                                                                                                                                                                           |
| Statistical methods          | 12      | (a) Describe all statistical methods, including those used to control for confounding <b>page 5-6</b><br>(b) Describe any methods used to examine subgroups and interactions <b>page 4-6</b><br>(c) Explain how missing data were addressed <b>page 4</b><br>(d) <i>Cohort study</i> —If applicable, explain how loss to follow-up was addressed <b>NA</b><br><i>Case-control study</i> —If applicable, explain how matching of cases and controls was addressed <b>NA</b><br><i>Cross-sectional study</i> —If applicable, describe analytical methods taking account of sampling strategy <b>NA</b><br>(e) Describe any sensitivity analyses <b>NA</b>                                                                                                |

## Results

|                          |     |                                                                                                                                                                                                                                                                                                                                                                                                                                                                |
|--------------------------|-----|----------------------------------------------------------------------------------------------------------------------------------------------------------------------------------------------------------------------------------------------------------------------------------------------------------------------------------------------------------------------------------------------------------------------------------------------------------------|
| Participants             | 13* | (a) Report numbers of individuals at each stage of study—eg numbers potentially eligible, examined for eligibility, confirmed eligible, included in the study, completing follow-up, and analysed <b>page 4</b><br>(b) Give reasons for non-participation at each stage <b>page 4</b><br>(c) Consider use of a flow diagram <b>figure 1, page 4</b>                                                                                                            |
| Descriptive data         | 14* | (a) Give characteristics of study participants (eg demographic, clinical, social) and information on exposures and potential confounders <b>page 6</b><br>(b) Indicate number of participants with missing data for each variable of interest <b>figure 1, page 4</b><br>(c) <i>Cohort study</i> —Summarise follow-up time (eg, average and total amount) <b>Table 1 page 6-7</b>                                                                              |
| Outcome data             | 15* | <i>Cohort study</i> —Report numbers of outcome events or summary measures over time <b>page 6</b><br><i>Case-control study</i> —Report numbers in each exposure category, or summary measures of exposure <b>NA</b><br><i>Cross-sectional study</i> —Report numbers of outcome events or summary measures <b>NA</b>                                                                                                                                            |
| Main results             | 16  | (a) Give unadjusted estimates and, if applicable, confounder-adjusted estimates and their precision (eg, 95% confidence interval). Make clear which confounders were adjusted for and why they were included <b>table 1, page 7-9</b><br>(b) Report category boundaries when continuous variables were categorized <b>page 7</b><br>(c) If relevant, consider translating estimates of relative risk into absolute risk for a meaningful time period <b>NA</b> |
| Other analyses           | 17  | Report other analyses done—eg analyses of subgroups and interactions, and sensitivity analyses <b>NA</b>                                                                                                                                                                                                                                                                                                                                                       |
| <b>Discussion</b>        |     |                                                                                                                                                                                                                                                                                                                                                                                                                                                                |
| Key results              | 18  | Summarise key results with reference to study objectives <b>page 9</b>                                                                                                                                                                                                                                                                                                                                                                                         |
| Limitations              | 19  | Discuss limitations of the study, taking into account sources of potential bias or imprecision. Discuss both direction and magnitude of any potential bias <b>page 10-11</b>                                                                                                                                                                                                                                                                                   |
| Interpretation           | 20  | Give a cautious overall interpretation of results considering objectives, limitations, multiplicity of analyses, results from similar studies, and other relevant evidence <b>page 9-11</b>                                                                                                                                                                                                                                                                    |
| Generalisability         | 21  | Discuss the generalisability (external validity) of the study results <b>page 11</b>                                                                                                                                                                                                                                                                                                                                                                           |
| <b>Other information</b> |     |                                                                                                                                                                                                                                                                                                                                                                                                                                                                |
| Funding                  | 22  | Give the source of funding and the role of the funders for the present study and, if applicable, for the original study on which the present article is based <b>page 11</b>                                                                                                                                                                                                                                                                                   |

\*Give information separately for cases and controls in case-control studies and, if applicable, for exposed and unexposed groups in cohort and cross-sectional studies.

**Note:** An Explanation and Elaboration article discusses each checklist item and gives methodological background and published examples of transparent reporting. The STROBE checklist is best used in conjunction with this article (freely available on the Web sites of PLoS Medicine at <http://www.plosmedicine.org/>, Annals of Internal Medicine at <http://www.annals.org/>, and Epidemiology at <http://www.epidem.com/>). Information on the STROBE Initiative is available at [www.strobe-statement.org](http://www.strobe-statement.org).

# BMJ Open

## Prognostic value of different lymph node staging methods for node-positive cardia gastric cancer: a register-based retrospective cohort study

|                                 |                                                                                                                                                  |
|---------------------------------|--------------------------------------------------------------------------------------------------------------------------------------------------|
| Journal:                        | <i>BMJ Open</i>                                                                                                                                  |
| Manuscript ID                   | bmjopen-2021-050378.R2                                                                                                                           |
| Article Type:                   | Original research                                                                                                                                |
| Date Submitted by the Author:   | 29-Jul-2021                                                                                                                                      |
| Complete List of Authors:       | Wang, Xiao-Qing; Anhui Medical College<br>Bao, Min; Anhui Medical College<br>Zhang, Cheng; First Affiliated Hospital of Anhui Medical University |
| <b>Primary Subject Heading</b>: | Oncology                                                                                                                                         |
| Secondary Subject Heading:      | Gastroenterology and hepatology                                                                                                                  |
| Keywords:                       | Gastrointestinal tumours < ONCOLOGY, Gastrointestinal tumours < GASTROENTEROLOGY, SURGERY                                                        |
|                                 |                                                                                                                                                  |

SCHOLARONE™  
Manuscripts



I, the Submitting Author has the right to grant and does grant on behalf of all authors of the Work (as defined in the below author licence), an exclusive licence and/or a non-exclusive licence for contributions from authors who are: i) UK Crown employees; ii) where BMJ has agreed a CC-BY licence shall apply, and/or iii) in accordance with the terms applicable for US Federal Government officers or employees acting as part of their official duties; on a worldwide, perpetual, irrevocable, royalty-free basis to BMJ Publishing Group Ltd ("BMJ") its licensees and where the relevant Journal is co-owned by BMJ to the co-owners of the Journal, to publish the Work in this journal and any other BMJ products and to exploit all rights, as set out in our [licence](#).

The Submitting Author accepts and understands that any supply made under these terms is made by BMJ to the Submitting Author unless you are acting as an employee on behalf of your employer or a postgraduate student of an affiliated institution which is paying any applicable article publishing charge ("APC") for Open Access articles. Where the Submitting Author wishes to make the Work available on an Open Access basis (and intends to pay the relevant APC), the terms of reuse of such Open Access shall be governed by a Creative Commons licence – details of these licences and which [Creative Commons](#) licence will apply to this Work are set out in our licence referred to above.

Other than as permitted in any relevant BMJ Author's Self Archiving Policies, I confirm this Work has not been accepted for publication elsewhere, is not being considered for publication elsewhere and does not duplicate material already published. I confirm all authors consent to publication of this Work and authorise the granting of this licence.

1  
2  
3  
4  
5  
6  
7  
8  
9  
10  
11  
12  
13  
14  
15  
16  
17  
18  
19  
20  
21  
22  
23  
24  
25  
26  
27  
28  
29  
30  
31  
32  
33  
34  
35  
36  
37  
38  
39  
40  
41  
42  
43  
44  
45  
46  
47  
48  
49  
50  
51  
52  
53  
54  
55  
56  
57  
58  
59  
60

1 **Title page**

2 **Article title:** Prognostic value of different lymph node staging methods for node-positive cardia  
3 gastric cancer: a register-based retrospective cohort study

4 **Author information:** Xiao-Qing Wang 1, Min Bao 1, Cheng Zhang 2

5 1 Anhui Medical College, Hefei, Anhui, China PR

6 2 Anhui Provincial Cancer Institute, the First Affiliated Hospital of Anhui Medical University,  
7 Hefei, Anhui, China PR

8 Corresponding to: Cheng Zhang, [ahmuzc@sina.cn](mailto:ahmuzc@sina.cn)

9 **Disclaimer:** The views expressed in the submitted article are our own and not an official position  
10 of the institution or funder.

11 **Word count:** 2962 (excluding its abstract, acknowledgments, tables, figure legends, and  
12 references)

13 **Number of figures and tables:** This draft included 3 figures and 2 tables.

14 **Disclosure of relationships and activities:** None.

## 15 ABSTRACT

16 **Objective:** To investigate the prognostic efficacy of lymph node ratio (LNR) and log odds of  
17 positive lymph nodes (LODDS) in node-positive cardia gastric adenocarcinoma (CGA).

18 **Design:** A registry-based retrospective cohort study.

19 **Setting:** Patients diagnosed with node-positive CGA in the Surveillance, Epidemiology, and End  
20 Results (SEER) database from 2010 to 2015.

21 **Participants:** A total of 1038 patients were enrolled and randomly assigned (7:3) to the training  
22 set (N = 723) or validating set (N = 315).

23 **Primary outcome measure:** Cancer-specific survival (CSS).

24 **Results:** The baseline characteristics of the training and validation sets were similar. Based on the  
25 optimal cut-off values, LNR was classified into low (<0.09), medium (0.09~0.33), and high (>0.33)  
26 groups; LODDS was also classified into low (<-2.09), medium (-2.09~-0.65), and high (>-0.65)  
27 groups. CSS was significantly different across LNR and LODDS subgroups. The Harrell  
28 concordance index of the N stage was lower than that of the LNR or LODDS. The Akaike  
29 information criterion of the N stage was higher than that of the LNR or LODDS. Independent  
30 predictors included race, T stage, M stage, and LNR (or LODDS), and they were incorporated into  
31 nomograms for 1-, 2-, and 5-year CSS prediction. Calibration plots showed satisfactory results for  
32 internal and external validity of the nomogram.

33 **Conclusions:** LNR and LODDS staging methods have better prognostic efficacy than the  
34 traditional N staging method in CGA with node metastasis. Moreover, the two values are  
35 promising substitutes for N staging in nomogram development when other independent prognostic  
36 factors are incorporated.

## 37 KEY WORDS

38 Cardia; Adenocarcinoma; Stomach Neoplasms; Lymph Node Ratio; Neoplasm Staging

## 39 STRENGTHS AND LIMITATIONS OF THIS STUDY

- 40 ● This study used the national cancer registry data for cardia gastric adenocarcinoma research;
- 41 ● Novel staging methods based on the number of positive lymph nodes have been established  
42 for prognostic prediction.
- 43 ● Nomograms based on the new staging methods were constructed and validated;
- 44 ● The validity of the outcomes of the study needs to be confirmed in other populations.

45 **Patient consent form:** The SEER database review is granted exemption from obtaining patients'  
46 consents.

47 **Word count:** 2962 (excluding its abstract, acknowledgments, tables, figure legends, and  
48 references)

## 49 INTRODUCTION

50 Gastric cancer (GC) generally includes two topographical categories: non-cardia GC that occurs at  
51 a more distal part of the stomach and GC of the cardia that occurs at the gastroesophageal junction  
52 (GEJ). In contrast to the steady decline in the incidence of non-cardia GC, GC of the cardia occurs  
53 more frequently, particularly in high-income countries (1, 2). This trend is associated with obesity,  
54 gastroesophageal reflux disease, and Barrett esophagus (2). In addition to the difference in the  
55 incidence trend, the clinic pathological features and long-term survival vary between the two GC  
56 subtypes (3). Precise staging is necessary for the accurate prediction of survival. The  
57 Tumor-Node-Metastasis (TNM) classification 7<sup>th</sup> edition of the American Joint Committee on  
58 Cancer (AJCC) recommends harvesting of at least 15 lymph nodes (LN) for N staging (4, 5).  
59 However, inadequate LN harvest is frequent because of various reasons; thus, precise staging is  
60 difficult. It has been demonstrated that the LN ratio (LNR) could provide a better estimate of the  
61 survival of patients with GC after curative gastrectomy, regardless of the number of LNs  
62 examined (6), and might be a promising aid along with the TNM staging system (7). Furthermore,  
63 in previous reports, the log odds of positive LN (LODDS) outperformed the N and LNR staging  
64 systems in predicting the survival of patients with GC (8-10). Therefore, the traditional N staging  
65 classification might be substituted with different methods with improved performance.  
66 Nevertheless, few studies have evaluated the performance of the two LN staging systems in GC of  
67 the cardia, which has distinct clinical characteristics and epidemiology than other types of GC.

68 Here, we used the data of a nationwide cancer registry to evaluate the prognostic value of LNR  
69 and LODDS in patients with node-positive cardia gastric adenocarcinoma (CGA), and, if possible,  
70 construct a nomogram for the prediction of survival based on the new LN staging system.

## 71 METHODS

### 72 Study design and Participant Selection

73 This study was a Surveillance, Epidemiology, and End Results (SEER) registry-based  
74 retrospective cohort study, which aimed to enroll patients with node-positive CGA, review their  
75 critical clinical characteristics, and observe the survival of this population. The source of the  
76 SEER data is registered cases of cancer from various locations throughout the United States.  
77 Permission for data access was obtained by sending an application form and receiving  
78 confirmation mail with a valid username (21268-Nov2019) and password.

79 A SEER\*Stat (version 8.3.8) was used to access the Incidence-SEER Research Data, 18 Registries,  
80 Nov 2019 Sub 2000-2017 (SEER 18 database) (11) and to obtain data of node-positive patients  
81 with CGA. The inclusion criteria were as follows: 1) the International Classification of Disease for  
82 Oncology, Third Edition (ICD-O-3) code for the primary tumor site was C16.0 (cardia); 2) broad  
83 histological recode was 8140-8389 adenomas and adenocarcinomas; 3) diagnostic confirmation  
84 was by positive histology; 4) surgery was performed; 5) diagnosis was during 2010-2015; and 6)  
85 the definite number of positive regional nodes was known and was not zero. Cases with unknown  
86 race, T stage information, tumor size, or tumor grade were excluded. As shown in Figure 1, the  
87 final cohort comprised 1038 patients with node-positive CGA, of whom 857 were male, and 181  
88 were female. A total of 338 (32.56%) patients were above 70 years of age. Eight hundred and  
89 ninety-six (86.32%) patients were White, 64 were Black, and 78 were of other races. Of the total

90 cohort, 70% of the patients were randomly assigned to the training set (N = 723), and the  
91 remaining were assigned to the validation set (N = 315).

## 92 **Technical Information**

93 The main outcome was cancer-specific survival (CSS), which was defined as the period between  
94 the first diagnosis and death specifically due to CGA. In addition, we extracted the following  
95 variables for analysis: sex, race, age, AJCC 7<sup>th</sup> TNM stage information, tumor size, tumor grade,  
96 number of regional nodes examined, and number of regional nodes that were positive. The  
97 information about the stage of cancer was further corrected according to the AJCC 8<sup>th</sup> criteria.  
98 LNR and LODDS were calculated as previously reported (12). Briefly, LNR was defined as the  
99 ratio of the number of positive nodes divided by the total number of examined nodes. LODDS was  
100 calculated using the formula:  $\log(\text{NPLN}+0.50)/(\text{NDLN}-\text{NPLN}+0.50)$ , in which 0.50 was added to  
101 both the numerator and denominator to avoid an infinite number.

102 The optimal thresholds for dividing LNR and LODDS into trichotomous variables were  
103 determined using the X-tile software (version 3.6.1) (13), which were based on the maximal  
104 log-rank chi-square value that represented the greatest group difference in CSS probability. LNR  
105 and LODDS were classified into three levels because they are proposed as alternative indicators  
106 for N stage in node-positive GC, including N1, N2, and N3.

## 107 **Statistics**

108 The distributions of baseline characteristics between the training and validation sets were  
109 described and compared using chi-square test. Survival curves, median survival, and CSS rates  
110 were generated using Kaplan-Meier method. Outcome differences between the groups were  
111 analyzed using log-rank test. After testing proportional hazard assumption, a multivariable Cox  
112 regression model was used to establish a CSS prognostic model. The prognostic power was  
113 evaluated using Akaike information criterion (AIC) and Harrell concordance index (C-index). A  
114 predictive model with a lower AIC indicated a better model fit, while a higher C-index indicated a  
115 better discriminative ability. A C-index value of 0.5 indicated no predictive power, and an index  
116 of 1.0 indicated complete differentiation. Cox stepwise regression analysis was also performed to  
117 construct a nomogram for the prediction of 1-, 2-, and 5-year CSS. Validation of the nomogram  
118 was performed using internal and external calibration plots (14). Bootstraps with 1000 resamples  
119 were used for the validation activities. Receiver operator characteristic (ROC) curves and areas  
120 under the ROC curves (AUCs) were calculated to evaluate the accuracy of CSS prediction using  
121 different models. Decision curve analysis (DCA) was performed to determine the clinical  
122 application of different models: the proportion of true positive results minus the proportion of  
123 false positive results, and the relative risks of false-positive and false-negative results were  
124 weighted to obtain the net benefits of decision-making. All statistical analyses were performed  
125 using R software (version 3.5.3). A two-tailed P value of less than 0.05 was considered  
126 statistically significant.

## 127 **Patient and Public Involvement**

128 Due to the retrospective and observational nature of the study, the research question and outcome  
129 measures were not developed and influenced by patients' priorities, experiences, and preferences.  
130 Patients were not involved in the design, recruitment, and conduct of this study. Patients were not



131 asked to assess the burden of the intervention and time required to participate in the research. The  
 132 findings of the study will be disseminated online and are freely available for public.

### 133 **Ethics approval statement**

134 The Ethics Committee of Anhui Medical College exempted the requirement for ethics approval  
 135 because of the observational nature of the study.

## 136 **RESULTS**

137 Table 1 summarizes the demographic and clinical features of the participants. In all, 628 patients  
 138 (60.50%) were diagnosed with a tumor less than 5cm. Six hundred and forty patients (61.66%)  
 139 were diagnosed with grade III or IV cancer. The number of patients with T1, T2, T3, and T4 stage  
 140 was 94, 125, 717, and 102, respectively. The number of patients with N1, N2, and N3 stage was  
 141 479, 330, and 229, respectively. Seventy-five patients (7.23%) had distant metastasis at  
 142 presentation. The median CSS was 27 months. The rate of 1, 2, and 5-year CSS was 76.8%, 53.0%,  
 143 and 29.2%, respectively. There was no statistical difference in the baseline characteristics between  
 144 the training and validating set. The detailed information about the two sets is also presented in  
 145 Table 1.

Table 1. Baseline information of the included patients with node positive CGA, N(%).

| Groups     | Training set<br>(N = 723) | Validating set<br>(N = 315) | P-value |
|------------|---------------------------|-----------------------------|---------|
| Sex        |                           |                             |         |
| Male       | 596 (82.43)               | 261 (82.86)                 | 0.939   |
| Female     | 127 (17.57)               | 54 (17.14)                  |         |
| Age        |                           |                             |         |
| <70        | 490 (67.77)               | 210 (66.67)                 | 0.781   |
| ≥70        | 233 (32.23)               | 105 (33.33)                 |         |
| Race       |                           |                             |         |
| White      | 628 (86.86)               | 268 (85.08)                 | 0.437   |
| Black      | 40 (5.53)                 | 24 (7.62)                   |         |
| Others     | 55 (7.61)                 | 23 (7.30)                   |         |
| Tumor size |                           |                             |         |
| <5cm       | 442 (61.13)               | 186 (59.05)                 | 0.573   |
| ≥5cm       | 281 (38.87)               | 129 (40.95)                 |         |
| Grade      |                           |                             |         |
| I-II       | 279 (38.59)               | 119 (37.78)                 | 0.859   |
| III-IV     | 444 (61.41)               | 196 (62.22)                 |         |
| T stage    |                           |                             |         |
| T1a        | 17 (2.35)                 | 4 (1.27)                    | 0.224   |
| T1b        | 53 (7.33)                 | 20 (6.35)                   |         |
| T2         | 83 (11.48)                | 42 (13.33)                  |         |
| T3         | 501 (69.29)               | 216 (68.57)                 |         |
| T4a        | 49 (6.78)                 | 28 (8.89)                   |         |
| T4b        | 20 (2.77)                 | 5 (1.59)                    |         |

|                          |                   |                   |       |
|--------------------------|-------------------|-------------------|-------|
| N stage                  |                   |                   |       |
| N1                       | 332 (45.92)       | 147 (46.67)       |       |
| N2                       | 229 (31.67)       | 101 (32.06)       | 0.921 |
| N3                       | 162 (22.41)       | 67 (21.27)        |       |
| M stage                  |                   |                   |       |
| M0                       | 678 (93.78)       | 285 (90.48)       |       |
| M1                       | 45 (6.22)         | 30 (9.52)         | 0.079 |
| Low nodes yield          |                   |                   |       |
| Yes                      | 532 (73.58)       | 243 (77.14)       | 0.300 |
| No                       | 191 (26.42)       | 72 (22.86)        |       |
| No. of nodes harvest     | 17 (12, 25)       | 16 (11, 24)       | 0.400 |
| No. of positive nodes    | 3 (1, 6)          | 3 (1, 6)          | 1.000 |
| Median survival (months) | 28 (25, 32)       | 25 (21, 32)       | 0.361 |
| CSS rate (%)             |                   |                   |       |
| 1-year                   | 77.0 (74.0, 80.2) | 76.3 (71.6, 81.2) |       |
| 2-year                   | 53.7 (50.1, 57.5) | 51.4 (46.0, 57.5) |       |
| 5-year                   | 30.3 (26.7, 34.5) | 26.4 (20.9, 33.4) |       |

Abbreviation: CGA, cardia gastric adenocarcinoma; CSS, cancer-specific survival

146 According to X-tile software results, the optimal cut-off values for LNR were 0.09 and 0.33, and  
 147 for LODDS were -2.09 and -0.65. Thus, patients were classified into the low (<0.09, R1), medium  
 148 (0.09~0.33, R2), or high LNR (>0.33, R3) groups; or low (<-2.09, L1), medium (-2.09~-0.65, L2),  
 149 or high LODDS (>-0.65, L3) groups. For model optimization, LNR and LODDS were also  
 150 categorized into trichotomous factors using the cut-off values of  $P_{25}$  and  $P_{75}$ . The discrimination  
 151 ability of the model based on the interquartiles was poor (Suppl. Table 1); hence, this model was  
 152 not analyzed further. Next, we created the survival curves of the patients according to the N  
 153 staging, LNR, or LODDS staging system. As shown in Figure 2 in the training set, CSS was  
 154 significantly different between all the three staging systems (all the log-rank P values < 0.0001);  
 155 however the 95% confidence intervals (CIs) of N2 and N3 survival curve were initially divergent  
 156 and partly overlapped afterward. The inferior discriminative ability of the N system was further  
 157 reinforced by the AIC and C-index. As shown in Table 2, the C-index of the N stage was lower  
 158 than that of LNR or LODDS. Similarly, the AIC of the N stage was higher than that of the LNR or  
 159 LODDS. The clinical characteristics with statistical significance for CSS were further  
 160 incorporated in the Cox regression model as potential confounders (Suppl. Table 2), and all the  
 161 variables met the proportional hazard assumption (Suppl. Figure 1, all the P values > 0.05). The  
 162 prognostic value of the adjusted model was generally better than that of the crude model. In  
 163 addition, the prognostic value of the LNR system seemed to be poorer than that of the LODDS  
 164 system; however, the difference was not significant; hence, we incorporated both the systems for  
 165 nomogram construction.

Table 2. Prognostic values of variables for patients with node positive CGA (N = 1 038).

| Variables | Crude model |         |     | Adjusted model |         |     |
|-----------|-------------|---------|-----|----------------|---------|-----|
|           | HR (95% CI) | C-index | AIC | HR (95% CI)    | C-index | AIC |

| <b>Training set (N = 723)</b>   |                   |       |      |                   |            |
|---------------------------------|-------------------|-------|------|-------------------|------------|
| N stage                         |                   | 0.582 | 5403 |                   | 0.632 5365 |
| N1                              | 1 (ref)           |       |      | 1 (ref)           |            |
| N2                              | 1.53(1.24, 1.91)  |       |      | 1.42(1.14, 1.77)  |            |
| N3                              | 2.15 (1.70, 2.71) |       |      | 2.03(1.60, 2.59)  |            |
| LNR                             |                   | 0.607 | 5376 |                   | 0.643 5350 |
| R1                              | 1 (ref)           |       |      | 1 (ref)           |            |
| R2                              | 1.88 (1.44, 2.44) |       |      | 1.74 (1.33, 2.29) |            |
| R3                              | 3.02 (2.30, 3.97) |       |      | 2.63 (1.97, 3.50) |            |
| LODDS                           |                   | 0.609 | 5373 |                   | 0.644 5346 |
| L1                              | 1 (ref)           |       |      | 1 (ref)           |            |
| L2                              | 1.93 (1.48, 2.51) |       |      | 1.80 (1.36, 2.37) |            |
| L3                              | 3.13 (2.38, 4.13) |       |      | 2.77 (2.07, 3.70) |            |
| <b>Validating set (N = 315)</b> |                   |       |      |                   |            |
| N stage                         |                   | 0.596 | 1957 |                   | 0.675 1931 |
| N1                              | 1 (ref)           |       |      | 1 (ref)           |            |
| N2                              | 1.81 (1.31, 2.51) |       |      | 1.75 (1.25, 2.46) |            |
| N3                              | 2.18 (1.51, 3.15) |       |      | 2.23 (1.50, 3.30) |            |
| LNR                             |                   | 0.646 | 1927 |                   | 0.691 1913 |
| R1                              | 1 (ref)           |       |      | 1 (ref)           |            |
| R2                              | 2.20 (1.47, 3.30) |       |      | 1.91(1.26, 2.90)  |            |
| R3                              | 4.16 (2.76, 6.28) |       |      | 3.58 (2.30, 5.56) |            |
| LODDS                           |                   | 0.647 | 1927 |                   | 0.789 1914 |
| L1                              | 1 (ref)           |       |      | 1 (ref)           |            |
| L2                              | 2.07 (1.39, 3.09) |       |      | 2.08 (1.38, 3.14) |            |
| L3                              | 4.22 (2.79, 6.39) |       |      | 4.10 (2.65, 6.34) |            |

Abbreviations: CGA, cardia gastric adenocarcinoma; HR, hazard ratio; CI, confidence interval; AIC, Akaike information criterion; LNR, lymph node ratio; LODDS, log odds of positive lymph nodes.

Adjusted model considered race, tumor size, grade, T stage and M stage.

Stepwise Cox regression analysis showed race, T stage, M stage, and LNR (or LODDS) were independent predictors; hence, these factors were included in the nomograms. For both LNR and LODDS, the total score was 40, and a higher score suggested lower survival (Figure 3 and Suppl. Figure 2). Next, the calibration plot was used to assess the internal and external validity of the nomogram (Figure 3 and Suppl. Figure 2). Since the cross-spot line was generally close to the grey reference line, we concluded that the predicted CSS was well correlated with the actual state. In addition, ROC curves indicated that the AUC of the model based on N stage was lower than that of the model based on the nomogram of LNR or LODDS (Suppl. Figure 3). However the DCA plot does not show advantage of the nomogram (Suppl. Figure 3).

## DISCUSSION

The present study analyzed the databases of the national cancer registry and demonstrated that survival of patients with node-positive CGA could be well predicted when the traditional N staging method is substituted with an LNR or LODDS system. This outcome was seen both in

1  
2  
3 179 training and validation set. In the training set, the survival curves clearly separated when the  
4 180 patient grouping was implemented following the LNR or LODDS method, which was not  
5 181 achieved by the traditional N staging system. An adjusted model that simultaneously considered  
6 182 the staging, clinical, and demographic features, outperformed the crude model that only considers  
7 183 staging. Therefore, multiple independent survival factors were incorporated in the nomogram  
8 184 construction, which suggested White, deeper infiltration of the tumor, higher proportion of  
9 185 positive LN, and metastasis as risk factors. The nomograms performed consistently across the 1, 2,  
10 186 and 5-year prediction of the CSS as seen in the validation plots.

11 187 Previous studies have demonstrated the superiority of LNR or LODDS for prognostic prediction  
12 188 in GC after surgical resection (8-10, 15-17). However, the patients were not further classified  
13 189 according to the primary tumor site; this is a critical limitation since there is a significant  
14 190 difference between cardia and non-cardia GC in terms of tumor features, etiological factors, and  
15 191 biological behaviors (3). In the AJCC cancer staging 7<sup>th</sup> edition, tumors involving GEJ were  
16 192 categorized as esophageal cancer (5). This was debatable because the GC staging system has a  
17 193 better ability to predict survival of a GEJ tumor (18, 19). In the latest 8<sup>th</sup> edition (20), a tumor that  
18 194 has its epicenter within 2 cm of the GEJ and involves the GEJ (Siewert type I/II) is classified as  
19 195 esophageal cancer. Other types of GCs, including a tumor with an epicenter more than 2 cm from  
20 196 the GEJ or a tumor located with 2 cm of the GEJ but not involving the GEJ, are classified as GC.  
21 197 The superiority of the new system was confirmed by a retrospective observational study from two  
22 198 institutions in China that have a high volume of cases of GC, regardless of the Siewert type (21).  
23 199 In terms of the Siewert type II junctional adenocarcinoma, a marginal superiority of the  
24 200 esophageal cancer was found in discriminating survival rates after three and five years. However  
25 201 the advantage of the GC system lies in the division of the N3 category into N3a and N3b. Hence,  
26 202 the authors concluded that neither the esophageal nor the stomach staging system is accurate in  
27 203 predicting survival in Siewert type II junctional cancer (22). Moreover, CGA is probably a special  
28 204 entity that has different biological characteristics compared to distinct gastric or esophageal cancer.  
29 205 To the best of our knowledge, the present study is the first to demonstrate a superior prognostic  
30 206 prediction based on LNR or LODDS in patients with node-positive CGA. Unfortunately, we were  
31 207 unable to consider the Siewert type due to a lack of information in the SEER database; hence,  
32 208 further studies are necessary with a special focus on tumor location.

33 209 LNR and LODDS have been proven to be the strongest indicators of survival in gastric  
34 210 adenocarcinoma when LN harvest is inadequate (16, 17). It has been demonstrated that, in general,  
35 211 more extensive LN resection is associated with better survival, which might be due to either  
36 212 improved N classification or a therapeutic effect of lymphadenectomy. For esophageal cancer, the  
37 213 worldwide data shows that harvesting 10 nodes for pT1, 20 for pT2, and 30 or more for pT3/T4 is  
38 214 desirable for reaching maximum 5-year survival (23). For GC, a higher LN harvest also shows  
39 215 improved survival (24). It is suggested that at least 16 nodes be evaluated pathologically and  
40 216 evaluation of more than 30 nodes is desirable (25). Overall, it is encouraged to harvest as many  
41 217 LNs as possible; balancing the extent of LN resection necessary for accurate N staging and  
42 218 maximum survival without unnecessarily increasing the morbidity caused by radical  
43 219 lymphadenectomy. Nevertheless, many conditions can lead to inadequate LN harvest. It is  
44 220 estimated that only one-fifth of the patients with GC have an adequate number of LN examined in  
45 221 Iran (26), while more than 15 LNs are examined in 64% of the patients in the US (25). The LNR

222 and LODDS staging methods do not require an adequate number of LNs to be evaluated. In the  
223 present study, a low LN yield was found to be a risk factor for poor survival in univariate analysis;  
224 however, it was not significant in the LNR or LODDS based multivariate model, which indicates  
225 that LN harvest has little impact on prediction of survival based on LNR or LODDS. In fact, the  
226 new node category method is consistent when nodal assessment is inadequate during surgery not  
227 only for GC (8, 15-17) but also for colorectal cancer (27), esophageal cancer (28), oral squamous  
228 cell carcinoma (29), gallbladder cancer (30), and others.

229 The association between LNR and survival is a promising aspect of cardia GC that is currently  
230 emerging and might be clinically relevant. A higher ratio of positive LN indicates a worse  
231 outcome in cardia GC. Patients are at 2-3 times higher risk of cancer-specific death if the ratio is  
232 over 33%. The ratio of 9-33% also indicates a twofold risk. This effect is independent of other  
233 crucial clinical characteristics; thus, it is a useful tool for surgeons to predict the prognosis. This is  
234 also evidence supporting truly radical surgery, i.e., complete lymph node resection rather than  
235 limited resection (31). In addition, LNR minimizes the “stage migration” phenomenon that occurs  
236 with the current N staging system (32).

237 One limitation of this study is that some important factors associated with survival have not been  
238 considered in the model due to unavailable data. For example, the Eastern Cooperative Oncology  
239 Group or Karnofsky Performance Status score is commonly considered in the survival analysis  
240 due to its remarkable relationship with the general status and prognosis. Unfortunately, the SEER  
241 18 database does not record the score at diagnosis; hence, its impact is not considered in this  
242 analysis. The treatment modality is also associated with clinical outcomes. This study enrolled  
243 patients who underwent gastric resection; however other information about chemo- or  
244 radiotherapy is not available in the SEER 18 database. A previous randomized clinical trial  
245 demonstrated that compared with surgery alone, preoperative administration of carboplatin and  
246 paclitaxel with concurrent radiotherapy significantly improved the overall survival among patients  
247 with esophageal or GEJ cancer (HR = 0.657) (33). The National Comprehensive Cancer Network  
248 clinical practice guidelines for GEJ cancer recommend preoperative chemoradiation or  
249 perioperative chemotherapy due to substantial survival benefits compared with surgery alone (34).  
250 To overcome this limitation, a database that provides fully detailed medical records is necessary  
251 for analysis. Moreover, the inclusion of these factors would greatly improve the prognostic power  
252 of the survival prediction model. Another limitation is that our results are based on the training set  
253 and confirmed by the validation set; however, the baseline characteristics of the two groups are  
254 similar. Hence, these results need to be validated among populations with different characteristics.  
255 The third limitation is clinical usability. The DCA result is proposed for assessing the potential  
256 clinical impact of risk models for recommending treatment or intervention, and the suggested  
257 clinical usability of the nomogram may be poorer than that of other models. In this regard,  
258 although this model may have some merits regarding outcome prediction, its use for guiding  
259 clinical decisions should be further studied.

260 In conclusion, staging methods based on LNR and LODDS have better prognostic ability than the  
261 traditional N staging method in patients of CGA with regional lymph node metastasis. Moreover,  
262 the two values are promising substitutes for N staging in nomogram development when other  
263 independent prognostic factors are incorporated.

264 **Contributorship statement:** WXQ work conception, data interpretation, critical review for  
265 important content, final approval of the manuscript and agreement to be accountable for all  
266 aspects of the work; BM administrative work, funding, critical review for important content, final  
267 approval of the manuscript and agreement to be accountable for all aspects of the work; ZC  
268 acquisition, analysis of data, drafting the work, final approval of the manuscript and agreement to  
269 be accountable for all aspects of the work.

270 **Competing interests:** None.

271 **Funding:** This work was supported by [Domestic Visiting Study Project for Outstanding Young  
272 Talents in Colleges and Universities in Anhui Province] grant number [gxnfx2021183] and  
273 [Major Project of Natural Science of Anhui Provincial Department of Education] grant number  
274 [KJ2019ZD73].

275 **Data sharing statement:** Dataset available from the SEER website  
276 (<https://seer.cancer.gov/data-software/>).

277 **Acknowledgement:** We thank all patient advisers for their special contribution.  
278

## References:

- 280 1. Bray F, Ferlay J, Soerjomataram I, Siegel RL, Torre LA, Jemal A. Global cancer statistics 2018:  
281 GLOBOCAN estimates of incidence and mortality worldwide for 36 cancers in 185 countries. *CA*  
282 *Cancer J Clin.* [Journal Article]. 2018 2018-11-01;68(6):394-424.
- 283 2. Abdi E, Latifi-Navid S, Zahri S, Yazdanbod A, Pourfarzi F. Risk factors predisposing to cardia  
284 gastric adenocarcinoma: Insights and new perspectives. *Cancer Med.* [Journal Article; Research  
285 Support, Non-U.S. Gov't; Review]. 2019 2019-10-01;8(13):6114-26.
- 286 3. Amini N, Spolverato G, Kim Y, Squires MH, Poultsides GA, Fields R, et al. Clinicopathological  
287 features and prognosis of gastric cardia adenocarcinoma: a multi-institutional US study. *J SURG*  
288 *ONCOL.* [Comparative Study; Journal Article; Multicenter Study]. 2015 2015-03-01;111(3):285-92.
- 289 4. Sobin L, Gospodarowicz M, Wittekind C. *TNM classification of malignant tumours. 7th edition.*:  
290 Wiley-Blackwell; 2009.
- 291 5. Edge S, Byrd D, Compton C, Fritz A, Greene F, Trotti A. *AJCC cancer staging manual. 7th*  
292 *edition.*: Springer; 2009.
- 293 6. Hou Y, Wang X, Chen J. Prognostic significance of metastatic lymph node ratio: the lymph node  
294 ratio could be a prognostic indicator for patients with gastric cancer. *WORLD J SURG ONCOL.*  
295 [Journal Article]. 2018 2018-10-04;16(1):198.
- 296 7. Zhu J, Xue Z, Zhang S, Guo X, Zhai L, Shang S, et al. Integrated analysis of the prognostic role  
297 of the lymph node ratio in node-positive gastric cancer: A meta-analysis. *INT J SURG.* [Journal Article;  
298 Meta-Analysis; Review]. 2018 2018-09-01;57:76-83.
- 299 8. Sun Z, Xu Y, Li DM, Wang ZN, Zhu GL, Huang BJ, et al. Log odds of positive lymph nodes: a  
300 novel prognostic indicator superior to the number-based and the ratio-based N category for gastric  
301 cancer patients with R0 resection. *CANCER-AM CANCER SOC.* [Journal Article; Research Support,  
302 Non-U.S. Gov't]. 2010 2010-06-01;116(11):2571-80.
- 303 9. Zhao E, Zhou C, Chen S. Prognostic nomogram based on log odds of positive lymph nodes for  
304 gastric carcinoma patients after surgical resection. *FUTURE ONCOL.* [Journal Article]. 2019  
305 2019-12-01;15(36):4207-22.
- 306 10. Gu P, Deng J, Sun Z, Wang Z, Wang W, Liang H, et al. Superiority of log odds of positive lymph

- 1  
2  
3 307 nodes (LODDS) for prognostic prediction after gastric cancer surgery: a multi-institutional analysis of  
4 308 7620 patients in China. *SURG TODAY*. [Journal Article]. 2021 2021-01-01;51(1):101-10.
- 5  
6 309 11. Surveillance, Epidemiology, and End Results (SEER) Program ([www.seer.cancer.gov](http://www.seer.cancer.gov))  
7 310 SEER\*Stat Database: Incidence - SEER Research Data, 18 Registries, Nov 2019 Sub (2000-2017) -  
8 311 Linked To County Attributes - Time Dependent (1990-2017) Income/Rurality, 1969-2018 Counties,  
9 312 National Cancer Institute, DCCPS, Surveillance Research Program, released April 2020, based on the  
10 313 November 2019 submission..
- 11  
12 314 12. Yu Y, Zhang P, Yao R, Wang J, Wang P, Xue X, et al. Prognostic value of log odds of positive  
13 315 lymph nodes in node-positive lung squamous cell carcinoma patients after surgery: a SEER  
14 316 population-based study. *Transl Lung Cancer Res*. [Journal Article]. 2020 2020-08-01;9(4):1285-301.
- 15  
16 317 13. Camp RL, Dolled-Filhart M, Rimm DL. X-tile: a new bio-informatics tool for biomarker  
17 318 assessment and outcome-based cut-point optimization. *CLIN CANCER RES*. [Journal Article;  
18 319 Research Support, Non-U.S. Gov't; Research Support, U.S. Gov't, Non-P.H.S.; Research Support, U.S.  
19 320 Gov't, P.H.S.]. 2004 2004-11-01;10(21):7252-9.
- 20  
21 321 14. Iasonos A, Schrag D, Raj GV, Panageas KS. How to build and interpret a nomogram for cancer  
22 322 prognosis. *J CLIN ONCOL*. [Journal Article; Review]. 2008 2008-03-10;26(8):1364-70.
- 23  
24 323 15. Jian-Hui C, Shi-Rong C, Hui W, Si-le C, Jian-Bo X, Er-Tao Z, et al. Prognostic value of three  
25 324 different lymph node staging systems in the survival of patients with gastric cancer following D2  
26 325 lymphadenectomy. *Tumour Biol*. [Journal Article]. 2016 2016-08-01;37(8):11105-13.
- 27  
28 326 16. Aurello P, Petrucciani N, Nigri GR, La Torre M, Magistri P, Tierno S, et al. Log odds of positive  
29 327 lymph nodes (LODDS): what are their role in the prognostic assessment of gastric adenocarcinoma? *J*  
30 328 *GASTROINTEST SURG*. [Comparative Study; Journal Article]. 2014 2014-07-01;18(7):1254-60.
- 31  
32 329 17. Kilic MO, Gundogdu SB, Ozden S, Saylam B, Tez M. The prognostic value of different node  
33 330 staging systems in patients with  $\leq 15$  lymph nodes following surgery for gastric adenocarcinoma.  
34 331 *ACTA CHIR BELG*. [Journal Article]. 2018 2018-02-01;118(1):1-6.
- 35  
36 332 18. Suh YS, Han DS, Kong SH, Lee HJ, Kim YT, Kim WH, et al. Should adenocarcinoma of the  
37 333 esophagogastric junction be classified as esophageal cancer? A comparative analysis according to the  
38 334 seventh AJCC TNM classification. *ANN SURG*. [Comparative Study; Journal Article; Research  
39 335 Support, Non-U.S. Gov't]. 2012 2012-05-01;255(5):908-15.
- 40  
41 336 19. Huang Q, Shi J, Feng A, Fan X, Zhang L, Mashimo H, et al. Gastric cardiac carcinomas involving  
42 337 the esophagus are more adequately staged as gastric cancers by the 7th edition of the American Joint  
43 338 Commission on Cancer Staging System. *Mod Pathol*. [Journal Article; Research Support, Non-U.S.  
44 339 Gov't; Validation Study]. 2011 2011-01-01;24(1):138-46.
- 45  
46 340 20. Amin M, Edge S, Greene F, Byrd D, Brookland R. *AJCC cancer staging manual*. 8th edition.:  
47 341 Springer; 2016.
- 48  
49 342 21. Liu K, Feng F, Chen XZ, Zhou XY, Zhang JY, Chen XL, et al. Comparison between gastric and  
50 343 esophageal classification system among adenocarcinomas of esophagogastric junction according to  
51 344 AJCC 8th edition: a retrospective observational study from two high-volume institutions in China.  
52 345 *GASTRIC CANCER*. [Comparative Study; Journal Article; Observational Study]. 2019  
53 346 2019-05-01;22(3):506-17.
- 54  
55 347 22. Karstens KF, Ghadban T, Sawez S, Konczalla L, Woestemeier A, Bachmann K, et al. Comparison  
56 348 of the 8th UICC staging system for esophageal and gastric cancers in Siewert type II junctional  
57 349 adenocarcinomas. *Eur J Surg Oncol*. [Comparative Study; Journal Article]. 2020 2020-04-01;46(4 Pt  
58 350 A):638-43.

- 1  
2  
3 351 23. Rizk NP, Ishwaran H, Rice TW, Chen LQ, Schipper PH, Kesler KA, et al. Optimum  
4 352 lymphadenectomy for esophageal cancer. *ANN SURG*. [Journal Article; Research Support, Non-U.S.  
5 353 Gov't]. 2010 2010-01-01;251(1):46-50.
- 7 354 24. Macalindong SS, Kim KH, Nam BH, Ryu KW, Kubo N, Kim JY, et al. Effect of total number of  
8 355 harvested lymph nodes on survival outcomes after curative resection for gastric adenocarcinoma:  
9 356 findings from an eastern high-volume gastric cancer center. *BMC CANCER*. [Journal Article;  
11 357 Research Support, Non-U.S. Gov't]. 2018 2018-01-12;18(1):73.
- 12 358 25. Schoenleber SJ, Schnelldorfer T, Wood CM, Qin R, Sarr MG, Donohue JH. Factors influencing  
13 359 lymph node recovery from the operative specimen after gastrectomy for gastric adenocarcinoma. *J*  
14 360 *GASTROINTEST SURG*. [Journal Article]. 2009 2009-07-01;13(7):1233-7.
- 16 361 26. Khanjani N, Mirzaei S, Nasrolahi H, Hamed SH, Mosalaei A, Omidvari S, et al. Insufficient  
17 362 lymph node assessment in gastric adenocarcinoma. *J Egypt Natl Canc Inst*. [Journal Article]. 2019  
18 363 2019-10-22;31(1):2.
- 20 364 27. Pei JP, Zhang CD, Fan YC, Dai DQ. Comparison of Different Lymph Node Staging Systems in  
21 365 Patients With Resectable Colorectal Cancer. *FRONT ONCOL*. [Journal Article]. 2018  
22 366 2018-01-20;8:671.
- 24 367 28. Cao J, Yuan P, Ma H, Ye P, Wang Y, Yuan X, et al. Log Odds of Positive Lymph Nodes Predicts  
25 368 Survival in Patients After Resection for Esophageal Cancer. *ANN THORAC SURG*. [Journal Article;  
26 369 Multicenter Study]. 2016 2016-08-01;102(2):424-32.
- 28 370 29. Jin W, Zhu Z, Wu Y, Ding X, Wu H, Song X, et al. Prognostic value of log odds of positive  
29 371 lymph nodes in patients with resectable oral squamous cell carcinoma. *ORAL ONCOL*. [Journal  
30 372 Article; Research Support, Non-U.S. Gov't]. 2020 2020-09-01;108:104709.
- 32 373 30. Li J, Sun Y, Zhao B, Tang C, Fan D, Jiang W, et al. Lymph Node Ratio-Based Staging System for  
33 374 Gallbladder Cancer With Fewer Than Six Lymph Nodes Examined. *FRONT ONCOL*. [Journal  
34 375 Article]. 2020 2020-01-20;10:542005.
- 36 376 31. Spillane AJ, Cheung BL, Winstanley J, Thompson JF. Lymph node ratio provides prognostic  
37 377 information in addition to american joint committee on cancer N stage in patients with melanoma, even  
38 378 if quality of surgery is standardized. *ANN SURG*. [Journal Article]. 2011 2011-01-01;253(1):109-15.
- 39 379 32. Rosa F, Tortorelli AP, Alfieri S, Doglietto GB. Lymph node ratio for gastric cancer: useful  
40 380 instrument or just an expedient to retrieve fewer lymph nodes? *ANN SURG*. [Letter; Comment]. 2014  
41 381 2014-04-01;259(4):e65.
- 43 382 33. van Hagen P, Hulshof MC, van Lanschot JJ, Steyerberg EW, van Berge HM, Wijnhoven BP, et al.  
44 383 Preoperative chemoradiotherapy for esophageal or junctional cancer. *N Engl J Med*. [Journal Article;  
45 384 Multicenter Study; Randomized Controlled Trial; Research Support, Non-U.S. Gov't]. 2012  
46 385 2012-05-31;366(22):2074-84.
- 48 386 34. Ajani JA, D'Amico TA, Bentrem DJ, Chao J, Corvera C, Das P, et al. Esophageal and  
49 387 Esophagogastric Junction Cancers, Version 2.2019, NCCN Clinical Practice Guidelines in Oncology. *J*  
50 388 *Natl Compr Canc Netw*. [Journal Article]. 2019 2019-07-01;17(7):855-83.

389

**FIGURE LEGENDS**

390 Figure 1. Flow diagram of the patient selection and grouping.

391 Figure 2. Survival curves of the training and validating sets by different staging systems.

392 Figure 3. Construction of nomogram based on Tumor-Lymph node ratio-Metastasis staging system  
393 and calibration plots for the nomogram.  
394



1  
2  
3 395 Suppl. Figure 1. Kaplan Meier plots for proportional hazard assumption test in models that were  
4 396 based on N stage, lymph node ratio, and log odds of positive lymph nodes.  
5  
6 397 Suppl. Figure 2. Construction of nomogram based on Tumor-Log odds of positive lymph nodes  
7 398 -Metastasis staging system and calibration plots for the nomogram.  
8 399 Suppl. Figure 3. Receiver operator characteristic curves and decision curve analysis plots for  
9 400 comparison of the prediction powers of the different models.  
10  
11 401  
12  
13  
14  
15  
16  
17  
18  
19  
20  
21  
22  
23  
24  
25  
26  
27  
28  
29  
30  
31  
32  
33  
34  
35  
36  
37  
38  
39  
40  
41  
42  
43  
44  
45  
46  
47  
48  
49  
50  
51  
52  
53  
54  
55  
56  
57  
58  
59  
60

For peer review only

1  
2  
3  
4  
5  
6  
7  
8  
9  
10  
11  
12  
13  
14  
15  
16  
17  
18  
19  
20  
21  
22  
23  
24  
25  
26  
27  
28  
29  
30  
31  
32  
33  
34  
35  
36  
37  
38  
39  
40  
41  
42  
43  
44  
45  
46



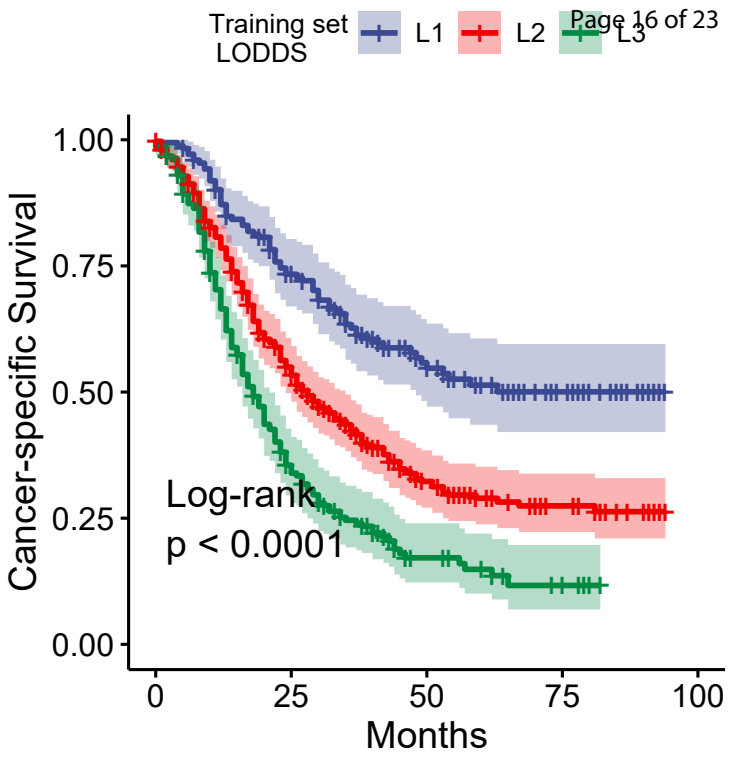

1  
2  
3  
4  
5  
6  
7  
8  
9  
10  
11  
12  
13  
14  
15  
16  
17  
18  
19  
20  
21  
22  
23  
24  
25  
26  
27  
28  
29  
30  
31  
32  
33  
34  
35  
36  
37  
38  
39  
40  
41

Points



Race



T.stage



LNR



M.stage



Total Points



1-year CSS

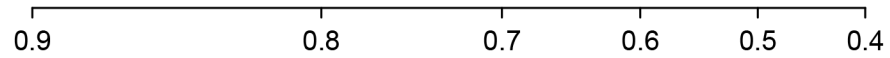

2-year CSS



5-year CSS

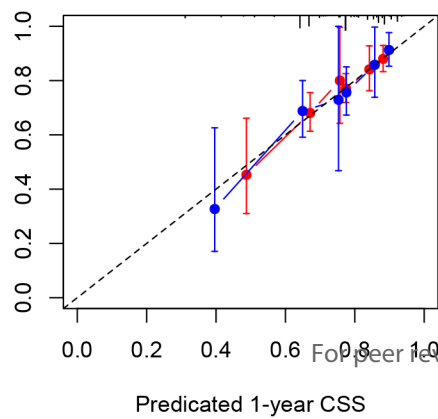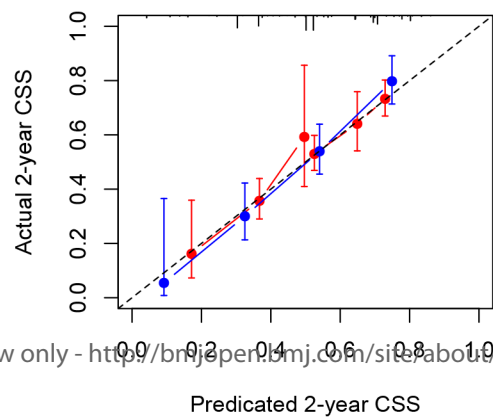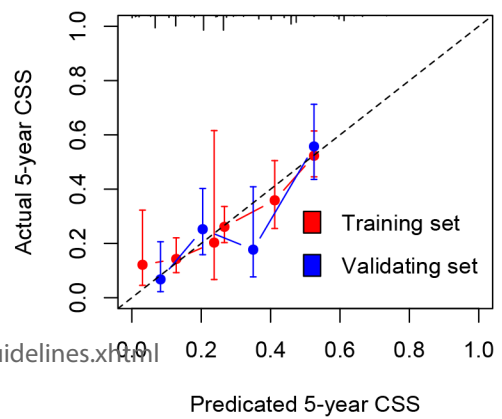

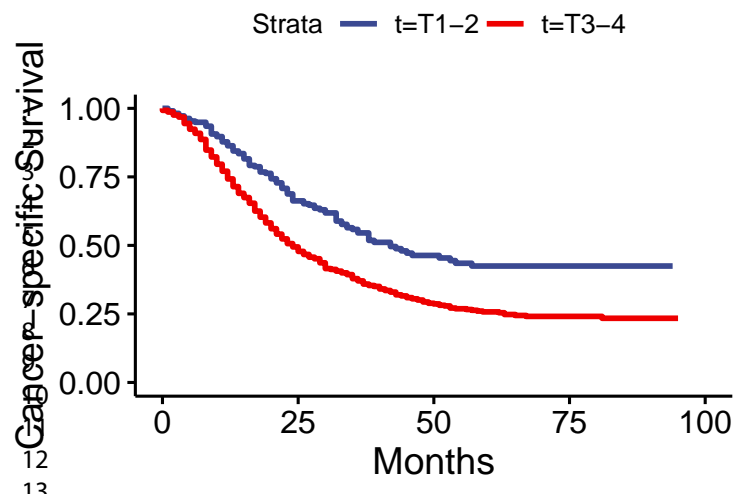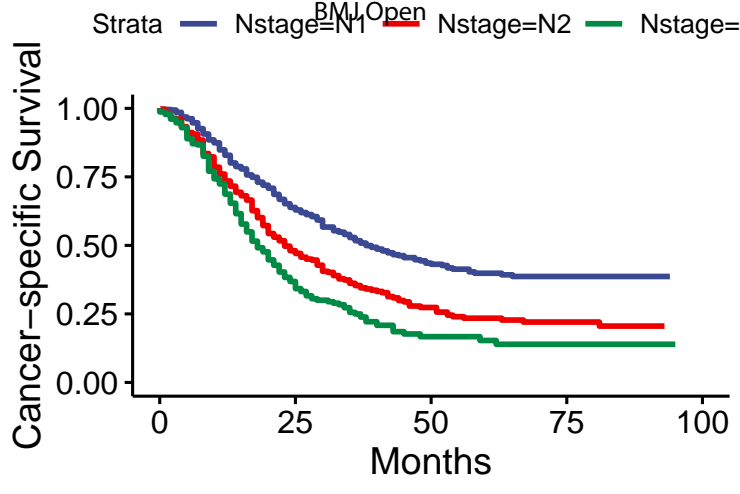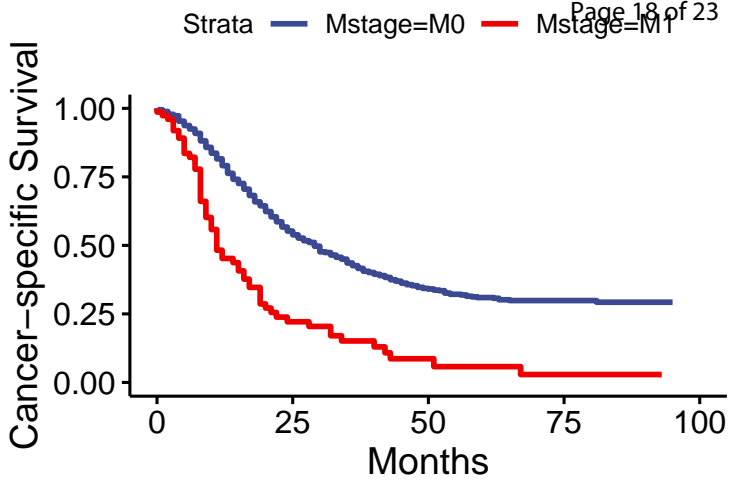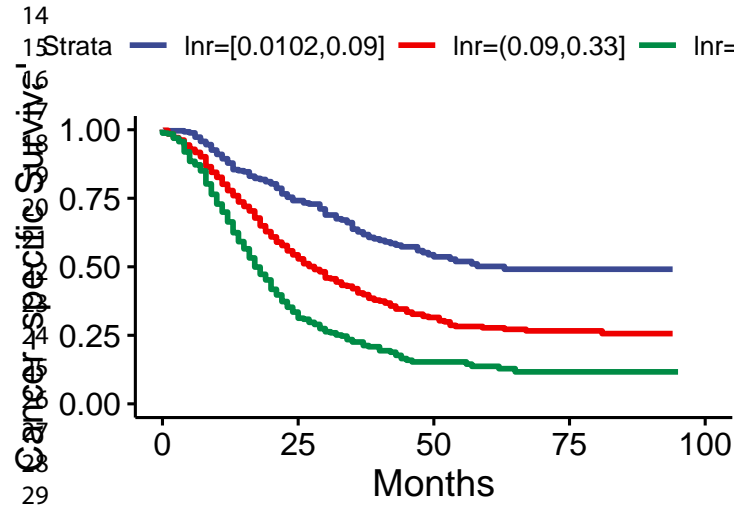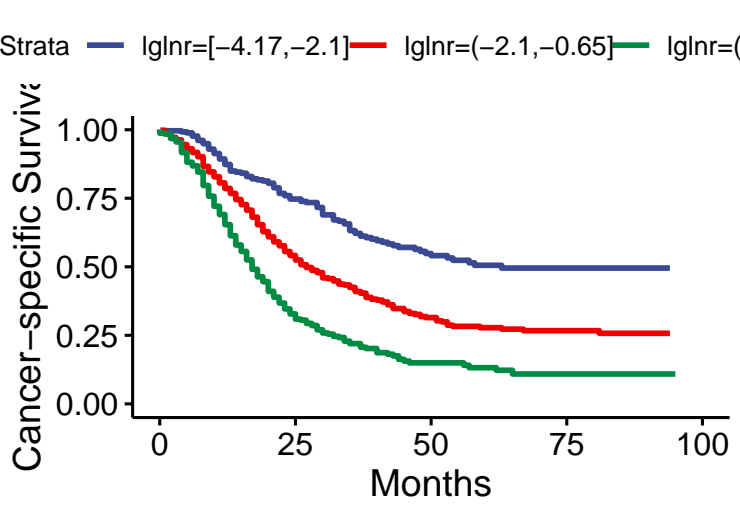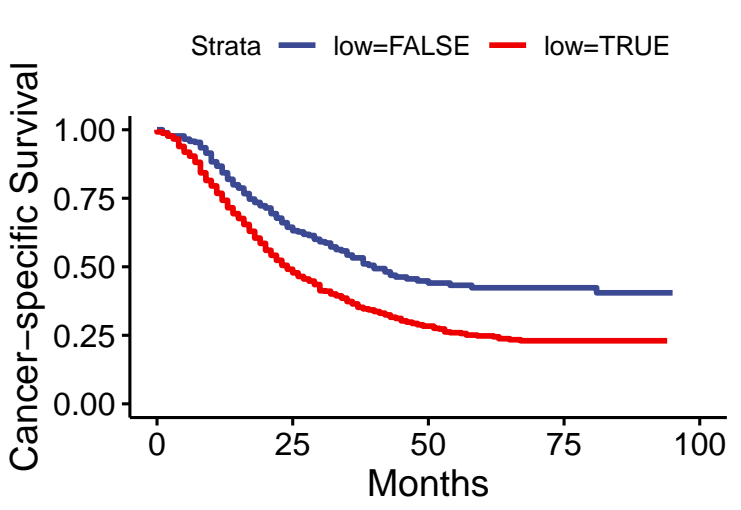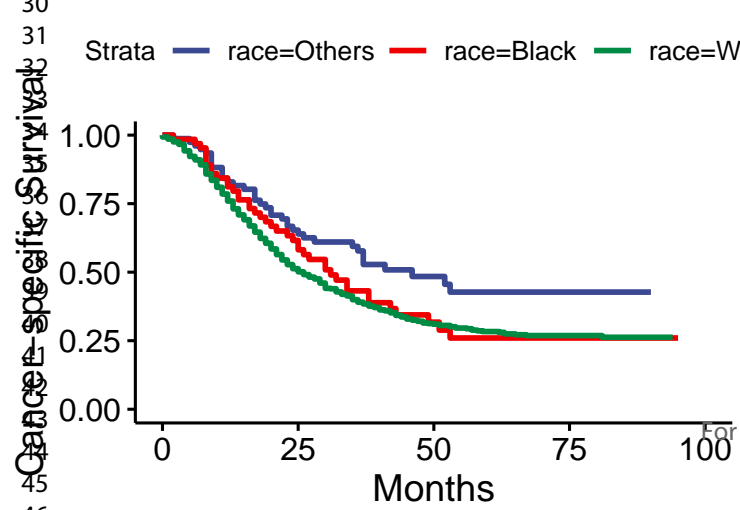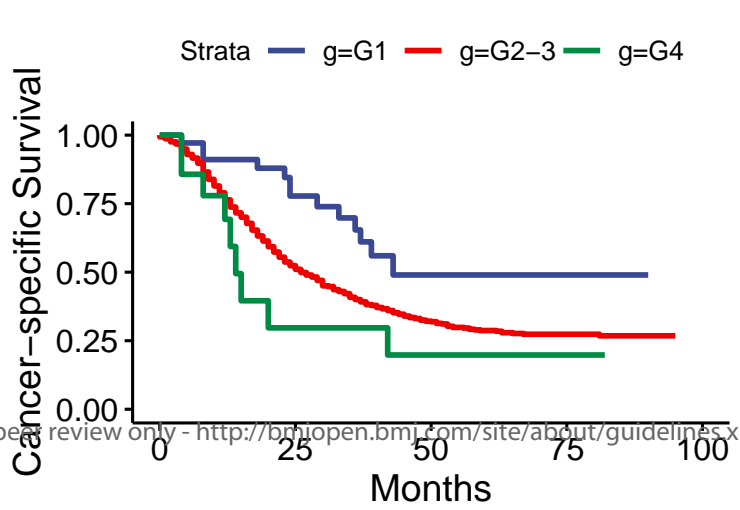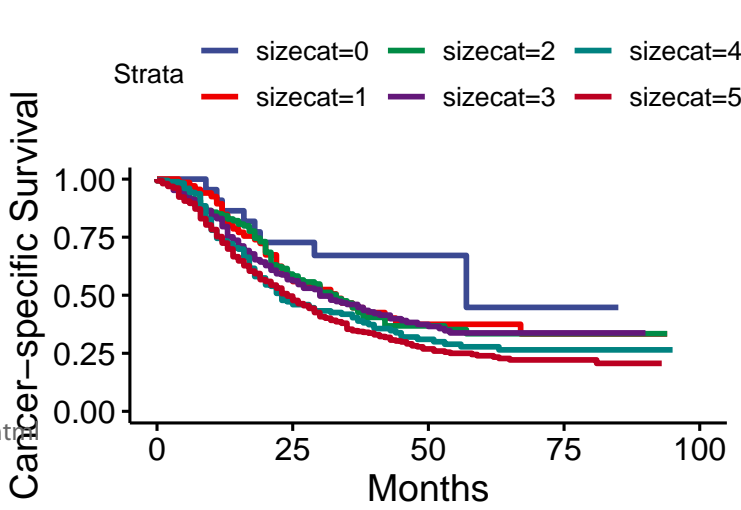

Points



Race



T.stage



LODDS

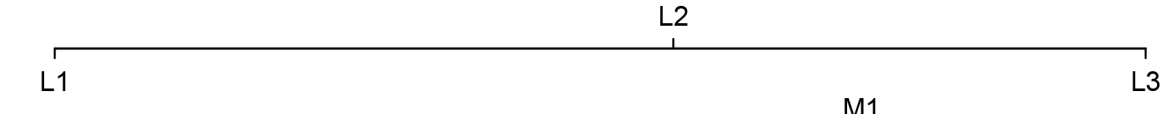

M.stage

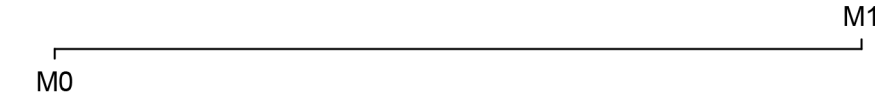

Total Points

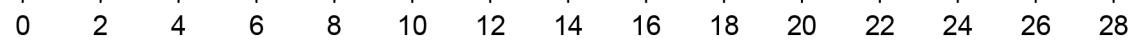

1-year CSS

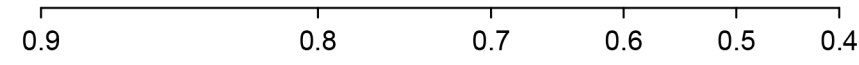

2-year CSS

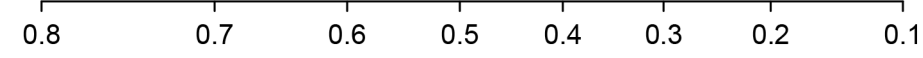

5-year CSS

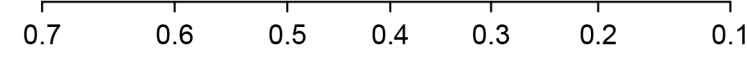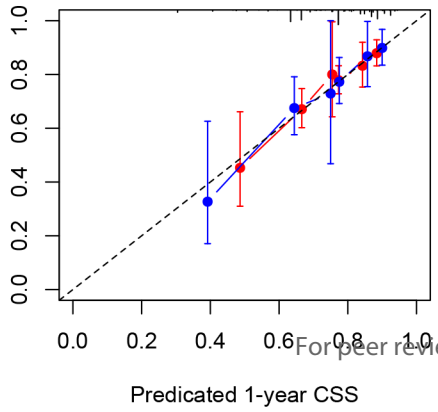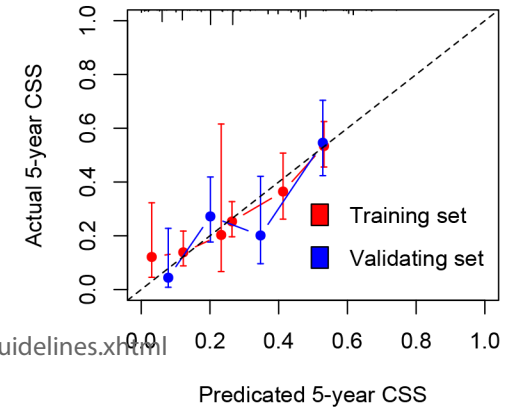

1  
2  
3  
4  
5  
6  
7  
8  
9  
10  
11  
12  
13  
14  
15  
16  
17  
18  
19  
20  
21  
22  
23  
24  
25  
26  
27  
28  
29  
30  
31  
32  
33  
34  
35  
36  
37  
38  
39  
40  
41

Training set



Validating set

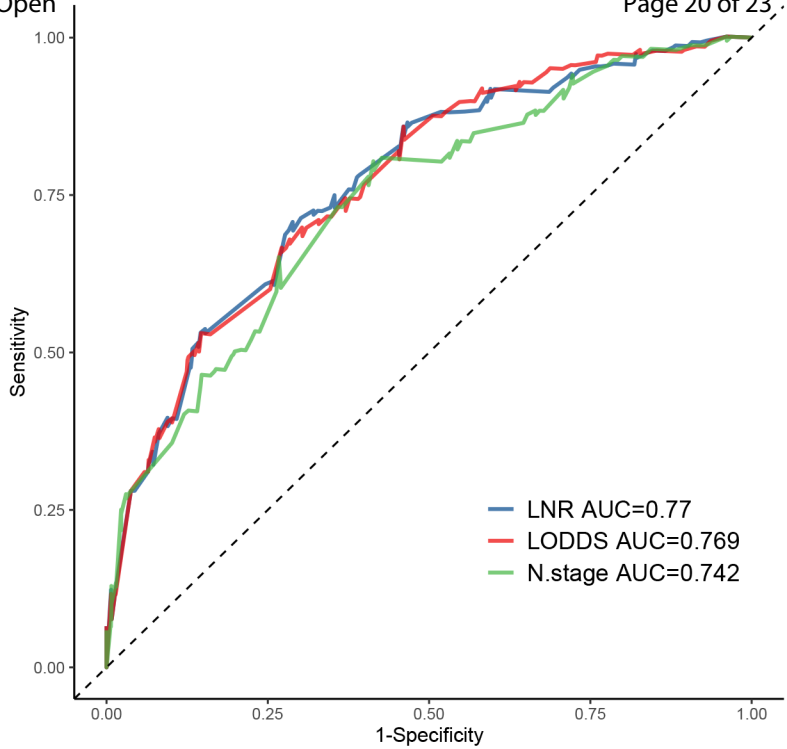

Training set



Validating set



Supplementary Table 1. Comparison of the discrimination ability of different models based on different cutoff values.

|             | Crude model       |         |      | Adjusted model    |         |
|-------------|-------------------|---------|------|-------------------|---------|
|             | HR (95% CI)       | C-index | AIC  | HR (95% CI)       | C-index |
| LNR         |                   |         |      |                   |         |
| Cutoff_1    |                   | 0.607   | 5376 | 0.643             | 5350    |
| <0.09       | 1 (ref)           |         |      | 1 (ref)           |         |
| 0.09~0.33   | 1.88 (1.44, 2.44) |         |      | 1.74 (1.33, 2.29) |         |
| >0.33       | 3.02 (2.30, 3.97) |         |      | 2.63 (1.97, 3.50) |         |
| Cutoff_2    |                   | 0.605   | 5378 | 0.641             | 5355    |
| <0.09       | 1 (ref)           |         |      | 1 (ref)           |         |
| 0.09~0.40   | 1.97 (1.52, 2.54) |         |      | 1.85 (1.38, 2.54) |         |
| >0.40       | 3.16 (2.38, 4.21) |         |      | 2.72 (2.02, 3.67) |         |
| LODDS       |                   |         |      |                   |         |
| Cutoff_1    |                   | 0.609   | 5373 | 0.644             | 5346    |
| <-2.09      | 1 (ref)           |         |      | 1 (ref)           |         |
| -2.09~-0.65 | 1.93 (1.48, 2.51) |         |      | 1.80 (1.36, 2.37) |         |
| >-0.65      | 3.13 (2.38, 4.13) |         |      | 2.77 (2.07, 3.70) |         |
| Cutoff_2    |                   | 0.605   | 5378 | 0.640             | 5352    |
| <-2.10      | 1 (ref)           |         |      | 1 (ref)           |         |
| -2.09~-0.37 | 2.00 (1.54, 2.59) |         |      | 1.86 (1.42, 2.44) |         |
| >-0.37      | 3.26 (2.45, 4.33) |         |      | 2.83 (2.10, 3.81) |         |

Cutoff\_1 was generated by minimal p-value method via X-tile software, cutoff\_2 was generated using P25 and P75.



Supplementary Table 2. Univariate analysis of the potential confounders.

| Variables                     | HR (95% CI)        | P-value |
|-------------------------------|--------------------|---------|
| Age (increased by 10ys)       | 1.06 (0.98 – 1.14) | 0.065   |
| Tumor size (increased by 1cm) | 1.13 (1.06 – 1.19) | <0.001  |
| Sex                           |                    |         |
| Male                          | 1                  |         |
| Female                        | 1.09 (0.89 – 1.34) | 0.386   |
| Race                          |                    |         |
| Others                        | 1                  |         |
| Black                         | 1.42 (0.91 – 2.21) | 0.118   |
| White                         | 1.57 (1.13 – 2.19) | 0.007   |
| Grade                         |                    |         |
| G1                            | 1                  |         |
| G2-3                          | 2.08 (1.20 – 3.60) | 0.009   |
| G4                            | 3.08 (1.32 – 7.22) | 0.009   |
| T                             |                    |         |
| T1-2                          | 1                  |         |
| T3-4                          | 1.70 (1.38 – 2.10) | <0.001  |
| N                             |                    |         |
| N1                            | 1                  |         |
| N2                            | 1.61 (1.34 – 1.93) | <0.001  |
| N3                            | 2.15 (1.77 – 2.62) | <0.001  |
| M                             |                    |         |
| M0                            | 1                  |         |
| M1                            | 2.61 (2.00 – 3.39) | <0.001  |
| Low nodes yield               |                    |         |
| No                            | 1                  |         |
| Yes                           | 1.64 (1.35 – 1.99) | <0.001  |

1  
2  
3  
4  
5  
6  
7  
8  
9  
10  
11  
12  
13  
14  
15  
16  
17  
18  
19  
20  
21  
22  
23  
24  
25  
26  
27  
28  
29  
30  
31  
32  
33  
34  
35  
36  
37  
38  
39  
40  
41  
42  
43  
44  
45  
46  
47  
48  
49  
50  
51  
52  
53  
54  
55  
56  
57  
58  
59  
60

## STROBE Statement—checklist of items that should be included in reports of observational studies

|                              | Item No | Recommendation                                                                                                                                                                                                                                                                                                                                                                                                                                                                                                                                                                                                                                                                                                                                         |
|------------------------------|---------|--------------------------------------------------------------------------------------------------------------------------------------------------------------------------------------------------------------------------------------------------------------------------------------------------------------------------------------------------------------------------------------------------------------------------------------------------------------------------------------------------------------------------------------------------------------------------------------------------------------------------------------------------------------------------------------------------------------------------------------------------------|
| <b>Title and abstract</b>    | 1       | (a) Indicate the study's design with a commonly used term in the title or the abstract <b>title page</b><br>(b) Provide in the abstract an informative and balanced summary of what was done and what was found <b>page2</b>                                                                                                                                                                                                                                                                                                                                                                                                                                                                                                                           |
| <b>Introduction</b>          |         |                                                                                                                                                                                                                                                                                                                                                                                                                                                                                                                                                                                                                                                                                                                                                        |
| Background/rationale         | 2       | Explain the scientific background and rationale for the investigation being reported <b>page 3</b>                                                                                                                                                                                                                                                                                                                                                                                                                                                                                                                                                                                                                                                     |
| Objectives                   | 3       | State specific objectives, including any prespecified hypotheses <b>page3</b>                                                                                                                                                                                                                                                                                                                                                                                                                                                                                                                                                                                                                                                                          |
| <b>Methods</b>               |         |                                                                                                                                                                                                                                                                                                                                                                                                                                                                                                                                                                                                                                                                                                                                                        |
| Study design                 | 4       | Present key elements of study design early in the paper <b>page 3</b>                                                                                                                                                                                                                                                                                                                                                                                                                                                                                                                                                                                                                                                                                  |
| Setting                      | 5       | Describe the setting, locations, and relevant dates, including periods of recruitment, exposure, follow-up, and data collection <b>page 3-4</b>                                                                                                                                                                                                                                                                                                                                                                                                                                                                                                                                                                                                        |
| Participants                 | 6       | (a) <i>Cohort study</i> —Give the eligibility criteria, and the sources and methods of selection of participants. Describe methods of follow-up <b>page 4</b><br><i>Case-control study</i> —Give the eligibility criteria, and the sources and methods of case ascertainment and control selection. Give the rationale for the choice of cases and controls <b>NA</b><br><i>Cross-sectional study</i> —Give the eligibility criteria, and the sources and methods of selection of participants <b>NA</b><br>(b) <i>Cohort study</i> —For matched studies, give matching criteria and number of exposed and unexposed <b>NA</b><br><i>Case-control study</i> —For matched studies, give matching criteria and the number of controls per case <b>NA</b> |
| Variables                    | 7       | Clearly define all outcomes, exposures, predictors, potential confounders, and effect modifiers. Give diagnostic criteria, if applicable <b>page 4</b>                                                                                                                                                                                                                                                                                                                                                                                                                                                                                                                                                                                                 |
| Data sources/<br>measurement | 8*      | For each variable of interest, give sources of data and details of methods of assessment (measurement). Describe comparability of assessment methods if there is more than one group <b>page 3-4</b>                                                                                                                                                                                                                                                                                                                                                                                                                                                                                                                                                   |
| Bias                         | 9       | Describe any efforts to address potential sources of bias <b>page 4</b>                                                                                                                                                                                                                                                                                                                                                                                                                                                                                                                                                                                                                                                                                |
| Study size                   | 10      | Explain how the study size was arrived at <b>NA</b>                                                                                                                                                                                                                                                                                                                                                                                                                                                                                                                                                                                                                                                                                                    |
| Quantitative variables       | 11      | Explain how quantitative variables were handled in the analyses. If applicable, describe which groupings were chosen and why <b>page 4</b>                                                                                                                                                                                                                                                                                                                                                                                                                                                                                                                                                                                                             |
| Statistical methods          | 12      | (a) Describe all statistical methods, including those used to control for confounding <b>page 4</b><br>(b) Describe any methods used to examine subgroups and interactions <b>page 4</b><br>(c) Explain how missing data were addressed <b>page 4</b><br>(d) <i>Cohort study</i> —If applicable, explain how loss to follow-up was addressed <b>NA</b><br><i>Case-control study</i> —If applicable, explain how matching of cases and controls was addressed <b>NA</b><br><i>Cross-sectional study</i> —If applicable, describe analytical methods taking account of sampling strategy <b>NA</b><br>(e) Describe any sensitivity analyses <b>NA</b>                                                                                                    |
| <b>Results</b>               |         |                                                                                                                                                                                                                                                                                                                                                                                                                                                                                                                                                                                                                                                                                                                                                        |
| Participants                 | 13*     | (a) Report numbers of individuals at each stage of study—eg numbers potentially eligible,                                                                                                                                                                                                                                                                                                                                                                                                                                                                                                                                                                                                                                                              |

|                          |     |                                                                                                                                                                                                                                       |
|--------------------------|-----|---------------------------------------------------------------------------------------------------------------------------------------------------------------------------------------------------------------------------------------|
|                          |     | examined for eligibility, confirmed eligible, included in the study, completing follow-up, and analysed <b>page 5</b>                                                                                                                 |
|                          |     | (b) Give reasons for non-participation at each stage <b>page 5</b>                                                                                                                                                                    |
|                          |     | (c) Consider use of a flow diagram <b>figure 1, page 3</b>                                                                                                                                                                            |
| Descriptive data         | 14* | (a) Give characteristics of study participants (eg demographic, clinical, social) and information on exposures and potential confounders <b>page 5-6</b>                                                                              |
|                          |     | (b) Indicate number of participants with missing data for each variable of interest <b>figure 1, page 3</b>                                                                                                                           |
|                          |     | (c) <i>Cohort study</i> —Summarise follow-up time (eg, average and total amount) <b>Table 1 page 5-6</b>                                                                                                                              |
| Outcome data             | 15* | <i>Cohort study</i> —Report numbers of outcome events or summary measures over time <b>page 5</b>                                                                                                                                     |
|                          |     | <i>Case-control study</i> —Report numbers in each exposure category, or summary measures of exposure <b>NA</b>                                                                                                                        |
|                          |     | <i>Cross-sectional study</i> —Report numbers of outcome events or summary measures <b>NA</b>                                                                                                                                          |
| Main results             | 16  | (a) Give unadjusted estimates and, if applicable, confounder-adjusted estimates and their precision (eg, 95% confidence interval). Make clear which confounders were adjusted for and why they were included <b>table 1, page 5-6</b> |
|                          |     | (b) Report category boundaries when continuous variables were categorized <b>page 6</b>                                                                                                                                               |
|                          |     | (c) If relevant, consider translating estimates of relative risk into absolute risk for a meaningful time period <b>NA</b>                                                                                                            |
| Other analyses           | 17  | Report other analyses done—eg analyses of subgroups and interactions, and sensitivity analyses <b>NA</b>                                                                                                                              |
| <b>Discussion</b>        |     |                                                                                                                                                                                                                                       |
| Key results              | 18  | Summarise key results with reference to study objectives <b>page 7-8</b>                                                                                                                                                              |
| Limitations              | 19  | Discuss limitations of the study, taking into account sources of potential bias or imprecision. Discuss both direction and magnitude of any potential bias <b>page 9</b>                                                              |
| Interpretation           | 20  | Give a cautious overall interpretation of results considering objectives, limitations, multiplicity of analyses, results from similar studies, and other relevant evidence <b>page 8-9</b>                                            |
| Generalisability         | 21  | Discuss the generalisability (external validity) of the study results <b>page 9</b>                                                                                                                                                   |
| <b>Other information</b> |     |                                                                                                                                                                                                                                       |
| Funding                  | 22  | Give the source of funding and the role of the funders for the present study and, if applicable, for the original study on which the present article is based <b>page 10</b>                                                          |

\*Give information separately for cases and controls in case-control studies and, if applicable, for exposed and unexposed groups in cohort and cross-sectional studies.

**Note:** An Explanation and Elaboration article discusses each checklist item and gives methodological background and published examples of transparent reporting. The STROBE checklist is best used in conjunction with this article (freely available on the Web sites of PLoS Medicine at <http://www.plosmedicine.org/>, Annals of Internal Medicine at <http://www.annals.org/>, and Epidemiology at <http://www.epidem.com/>). Information on the STROBE Initiative is available at [www.strobe-statement.org](http://www.strobe-statement.org).
