# Supplementary material for: Prognostic value of different lymph node staging methods for node-positive cardia gastric cancer: a register-based retrospective cohort study
Source: PubMed Central journal article supplement — BMJ Open. 2021 Aug 23;11(8):e050378. doi: 10.1136/bmjopen-2021-050378 (PMC8383860; doi:10.1136/bmjopen-2021-050378), 2021-08-23
Supplement: bmjopen-2021-050378supp001.pdf [file bmjopen-2021-050378supp001.pdf]

Supplementary Table 1. Comparison of the discrimination ability of different models based on different cutoff values.

|             | Crude model       |         |      | Adjusted model    |         |
|-------------|-------------------|---------|------|-------------------|---------|
|             | HR (95% CI)       | C-index | AIC  | HR (95% CI)       | C-index |
| LNR         |                   |         |      |                   |         |
| Cutoff_1    |                   | 0.607   | 5376 | 0.643             | 5350    |
| <0.09       | 1 (ref)           |         |      | 1 (ref)           |         |
| 0.09~0.33   | 1.88 (1.44, 2.44) |         |      | 1.74 (1.33, 2.29) |         |
| >0.33       | 3.02 (2.30, 3.97) |         |      | 2.63 (1.97, 3.50) |         |
| Cutoff_2    |                   | 0.605   | 5378 | 0.641             | 5355    |
| <0.09       | 1 (ref)           |         |      | 1 (ref)           |         |
| 0.09~0.40   | 1.97 (1.52, 2.54) |         |      | 1.85 (1.38, 2.54) |         |
| >0.40       | 3.16 (2.38, 4.21) |         |      | 2.72 (2.02, 3.67) |         |
| LODDS       |                   |         |      |                   |         |
| Cutoff_1    |                   | 0.609   | 5373 | 0.644             | 5346    |
| <-2.09      | 1 (ref)           |         |      | 1 (ref)           |         |
| -2.09~-0.65 | 1.93 (1.48, 2.51) |         |      | 1.80 (1.36, 2.37) |         |
| >-0.65      | 3.13 (2.38, 4.13) |         |      | 2.77 (2.07, 3.70) |         |
| Cutoff_2    |                   | 0.605   | 5378 | 0.640             | 5352    |
| <-2.10      | 1 (ref)           |         |      | 1 (ref)           |         |
| -2.09~-0.37 | 2.00 (1.54, 2.59) |         |      | 1.86 (1.42, 2.44) |         |
| >-0.37      | 3.26 (2.45, 4.33) |         |      | 2.83 (2.10, 3.81) |         |

Cutoff\_1 was generated by minimal p-value method via X-tile software, cutoff\_2 was generated using P25 and P75.

Supplementary Table 2. Univariate analysis of the potential confounders.

| Variables                     | HR (95% CI)        | P-value |
|-------------------------------|--------------------|---------|
| Age (increased by 10ys)       | 1.06 (0.98 – 1.14) | 0.065   |
| Tumor size (increased by 1cm) | 1.13 (1.06 – 1.19) | <0.001  |
| Sex                           |                    |         |
| Male                          | 1                  |         |
| Female                        | 1.09 (0.89 – 1.34) | 0.386   |
| Race                          |                    |         |
| Others                        | 1                  |         |
| Black                         | 1.42 (0.91 – 2.21) | 0.118   |
| White                         | 1.57 (1.13 – 2.19) | 0.007   |
| Grade                         |                    |         |
| G1                            | 1                  |         |
| G2-3                          | 2.08 (1.20 – 3.60) | 0.009   |
| G4                            | 3.08 (1.32 – 7.22) | 0.009   |
| T                             |                    |         |
| T1-2                          | 1                  |         |
| T3-4                          | 1.70 (1.38 – 2.10) | <0.001  |
| N                             |                    |         |
| N1                            | 1                  |         |
| N2                            | 1.61 (1.34 – 1.93) | <0.001  |
| N3                            | 2.15 (1.77 – 2.62) | <0.001  |
| M                             |                    |         |
| M0                            | 1                  |         |
| M1                            | 2.61 (2.00 – 3.39) | <0.001  |
| Low nodes yield               |                    |         |
| No                            | 1                  |         |
| Yes                           | 1.64 (1.35 – 1.99) | <0.001  |
