# Supplementary figures and images for: Prognostic value of different lymph node staging methods for node-positive cardia gastric cancer: a register-based retrospective cohort study
Source: PubMed Central journal article supplement — BMJ Open. 2021 Aug 23;11(8):e050378. doi: 10.1136/bmjopen-2021-050378 (PMC8383860; doi:10.1136/bmjopen-2021-050378), 2021-08-23

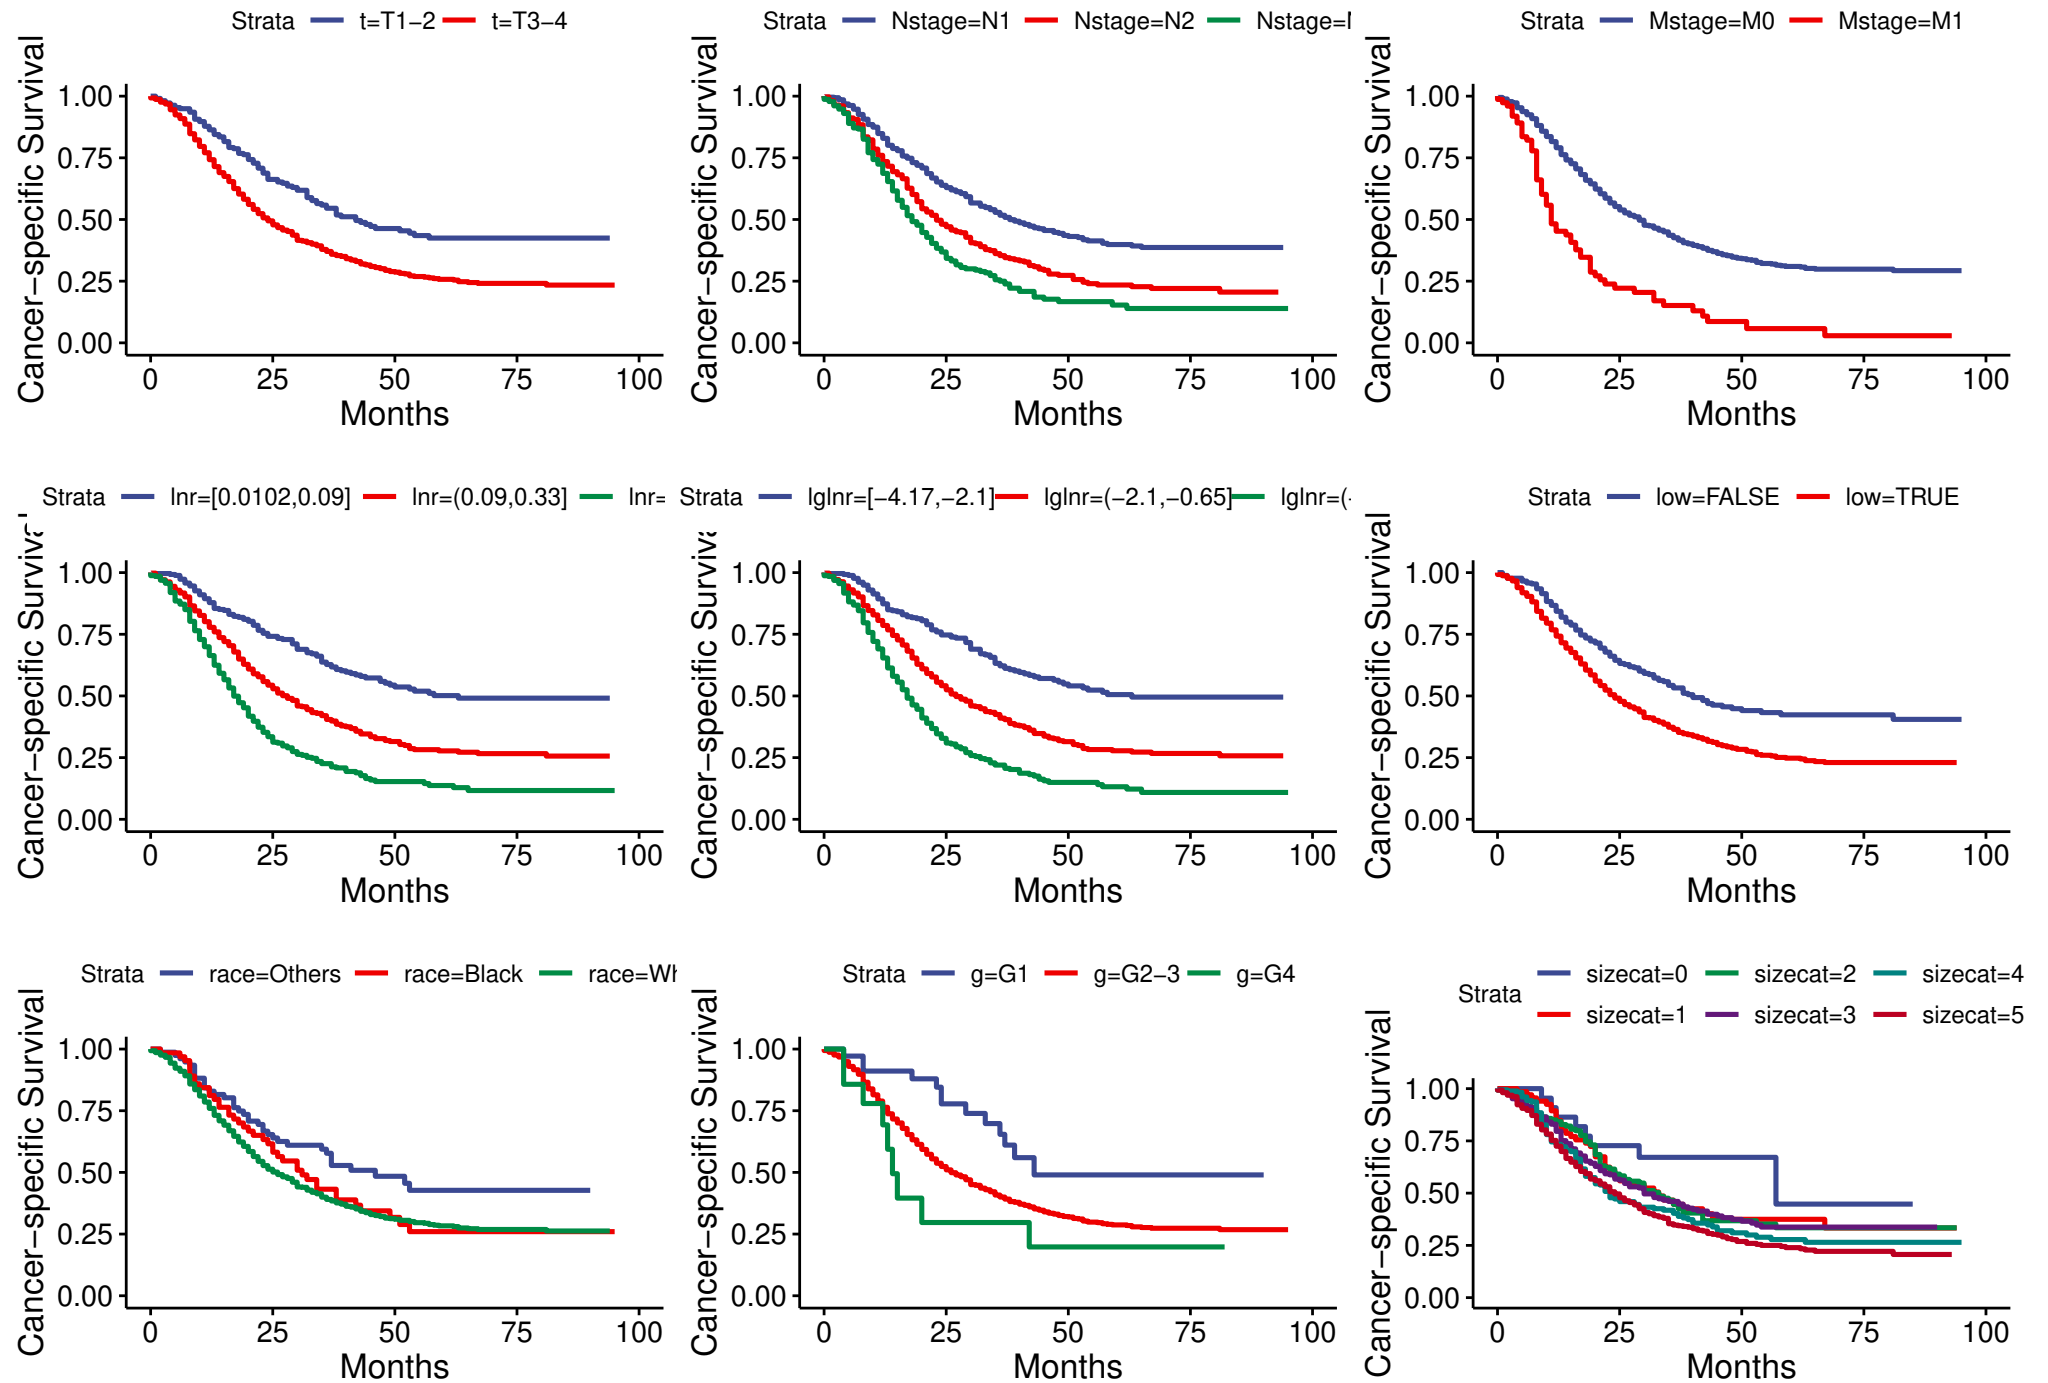

Supplement: bmjopen-2021-050378supp002.pdf [file bmjopen-2021-050378supp002.pdf]

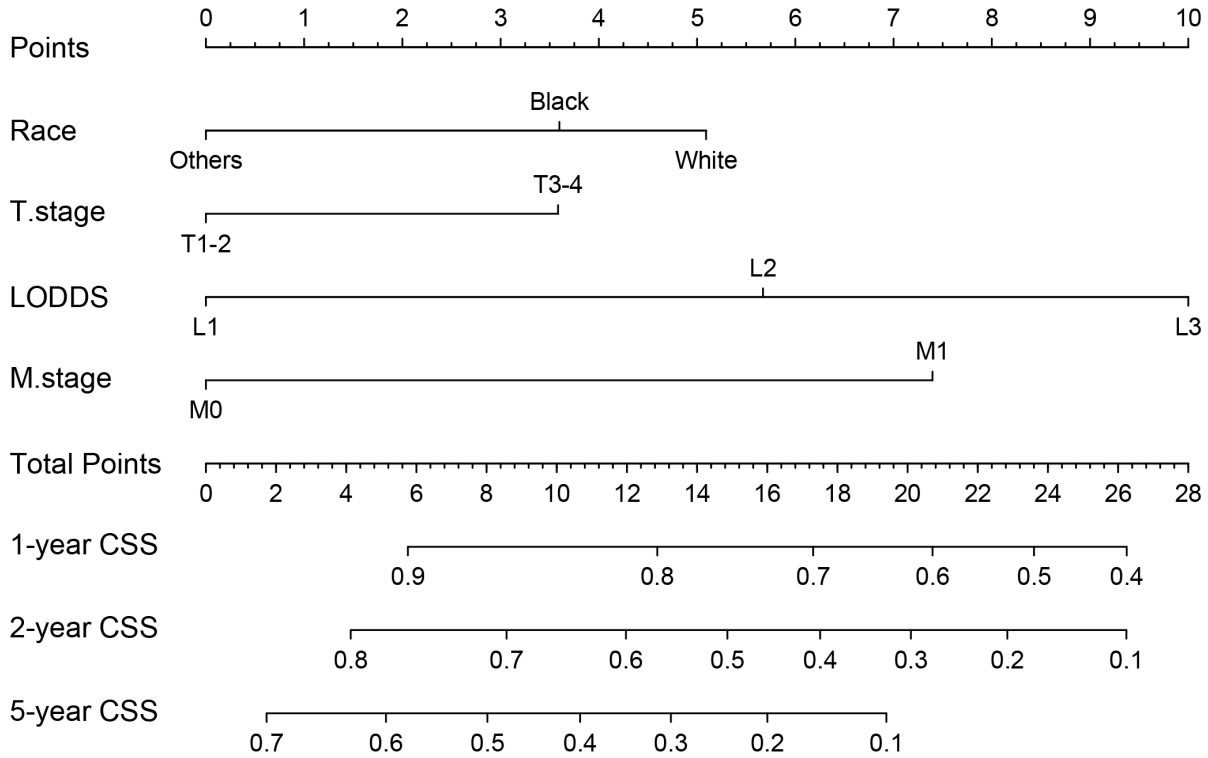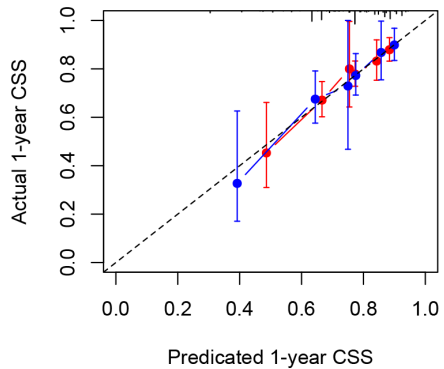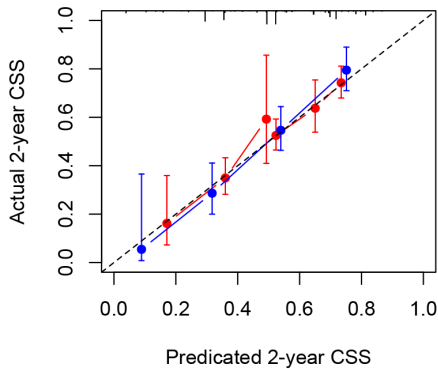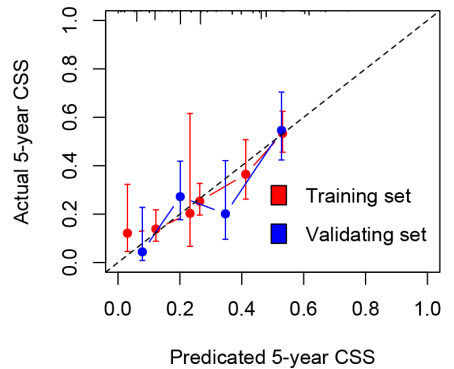

Supplement: bmjopen-2021-050378supp003.pdf [file bmjopen-2021-050378supp003.pdf]

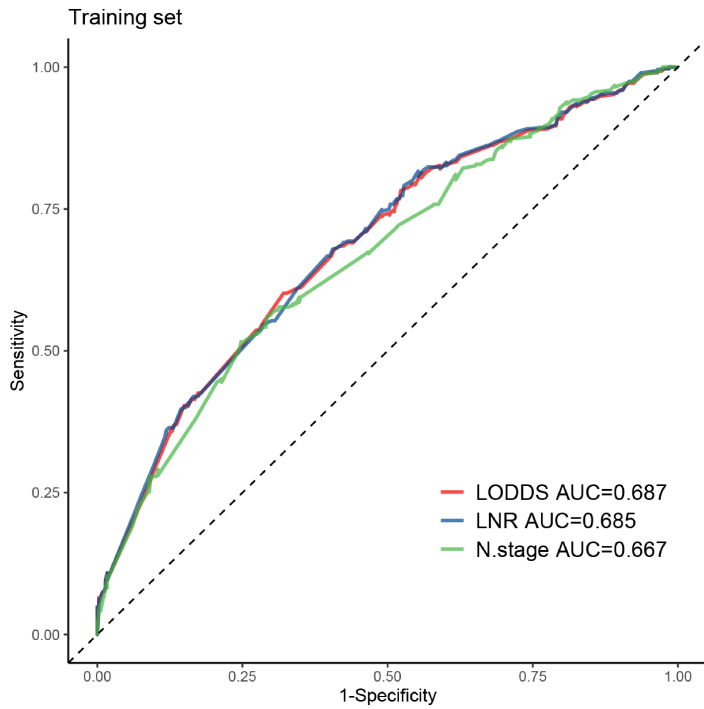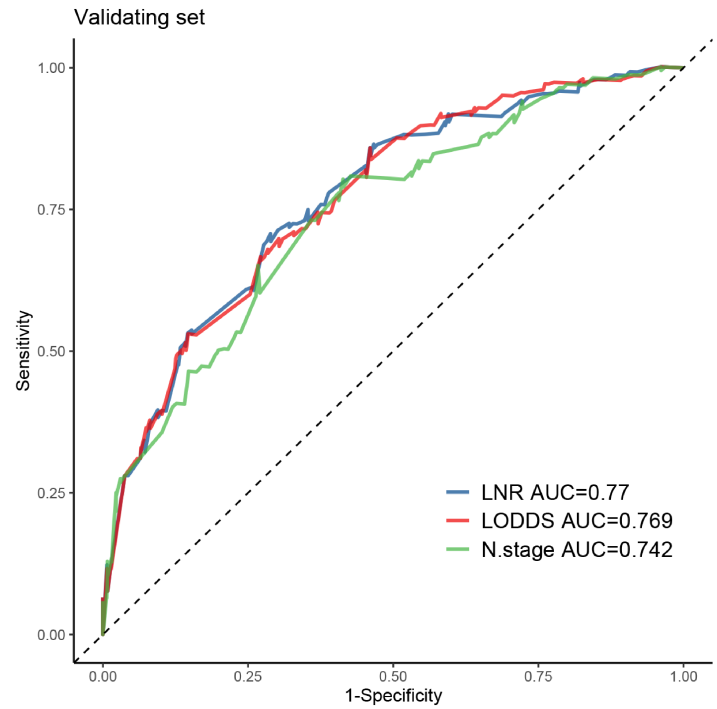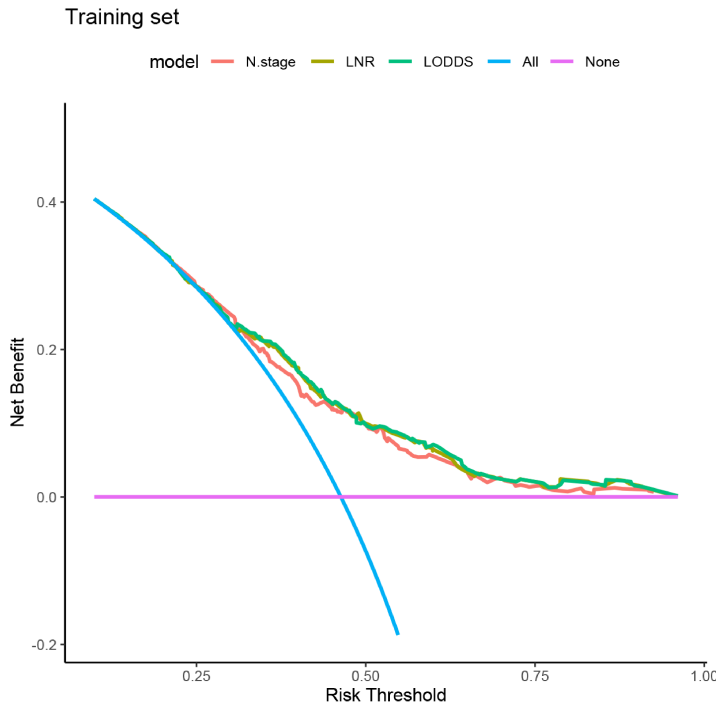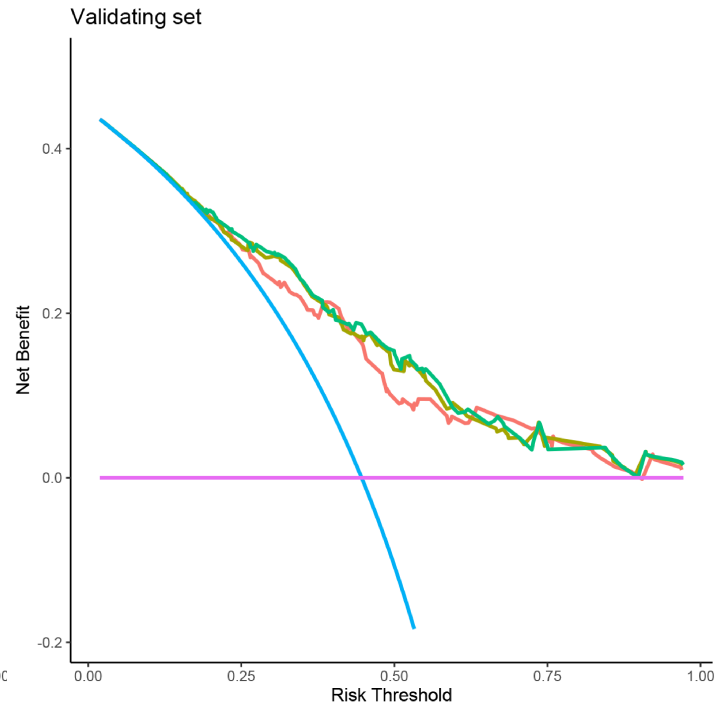

Supplement: bmjopen-2021-050378supp004.pdf [file bmjopen-2021-050378supp004.pdf]
